# Supplementary material for: Carboboration of isocyanates with tris(pentafluorophenyl)borane and evidence for dissociative FLP chemistry of an acid–base pair
Source: Royal Society of Chemistry journal article supplement (doi:10.1039/c9cc02707f), 2019-01-01
Supplement: c9cc02707f1.pdf [file c9cc02707f1.pdf]

Supporting Information

**Carboboration of isocyanates with tris(pentafluorophenyl)borane and  
evidence for dissociative FLP chemistry of an acid–base pair**

Meera Mehta,\* and Jose M. Goicoechea\*

Department of Chemistry, University of Oxford, Chemistry Research Laboratory, 12 Mansfield Road,  
Oxford, OX1 3TA, U.K.

E-mail: meera.mehta@chem.ox.ac.uk; jose.goicoechea@chem.ox.ac.uk

**Table of Contents**

|                                                            |           |
|------------------------------------------------------------|-----------|
| Table of Contents .....                                    | 1         |
| <b>1. Methods and Materials</b> .....                      | <b>3</b>  |
| <b>1.1. General Remarks</b> .....                          | <b>3</b>  |
| <b>1.2. X-ray Diffraction Studies</b> .....                | <b>3</b>  |
| <b>1.3. Kinetic Studies</b> .....                          | <b>4</b>  |
| <b>1.4. Thermodynamic Studies</b> .....                    | <b>4</b>  |
| <b>1.5. Computational Studies</b> .....                    | <b>4</b>  |
| <b>1.6. General Procedure for Scrambled Products</b> ..... | <b>5</b>  |
| <b>2. Synthesis and Characterization Data</b> .....        | <b>5</b>  |
| <b>2.1. Compound 1a</b> .....                              | <b>5</b>  |
| <b>2.2. Compound 1b</b> .....                              | <b>7</b>  |
| <b>2.3. Compound 1c</b> .....                              | <b>10</b> |
| <b>2.4. Compound 2</b> .....                               | <b>13</b> |
| <b>2.5. Compound 3a</b> .....                              | <b>15</b> |
| <b>2.6. Compound 3b</b> .....                              | <b>17</b> |
| <b>2.7. Compound 3c</b> .....                              | <b>20</b> |
| <b>2.8. Compound 3d</b> .....                              | <b>22</b> |
| <b>2.9. Compound 3e</b> .....                              | <b>24</b> |
| <b>2.10. Compound 3f</b> .....                             | <b>27</b> |
| <b>2.11. Compound 3g</b> .....                             | <b>29</b> |
| <b>2.12. Compound 3h</b> .....                             | <b>32</b> |
| <b>2.13. Compound 4</b> .....                              | <b>34</b> |
| <b>2.14. Compound 5</b> .....                              | <b>35</b> |
| <b>3. Kinetic Studies</b> .....                            | <b>38</b> |
| <b>4. Thermodynamic Studies</b> .....                      | <b>40</b> |

|                                                |    |
|------------------------------------------------|----|
| <b>5. Crystallographic Tables</b> .....        | 42 |
| <b>6. DFT Studies</b> .....                    | 43 |
| <b>6.1 Geometry Optimized Structures</b> ..... | 45 |
| <b>6.1.1. PhNCO</b> .....                      | 45 |
| <b>6.1.2. CyNCO</b> .....                      | 46 |
| <b>6.1.3. Compound 1a</b> .....                | 46 |
| <b>6.1.4. Compound A</b> .....                 | 48 |
| <b>6.1.5. Compound B</b> .....                 | 50 |
| <b>6.1.6. Compound C</b> .....                 | 52 |
| <b>6.1.7. Compound 2</b> .....                 | 54 |
| <b>6.1.8. Compound D</b> .....                 | 56 |
| <b>6.1.9. Compound 4</b> .....                 | 59 |
| <b>6.1.10. Compound E</b> .....                | 62 |
| <b>6.1.11. Compound F</b> .....                | 64 |
| <b>6.1.12. Compound 5</b> .....                | 66 |
| <b>6.1.13. Compound G</b> .....                | 69 |
| <b>6.1.14. Compound H</b> .....                | 70 |
| <b>7. References</b> .....                     | 73 |

## 1. Methods and Materials

### 1.1. General Remarks

All reactions and product manipulations were carried out under an inert atmosphere of argon or dinitrogen using standard Schlenk-line or glovebox techniques (MBraun UNILab glovebox maintained at  $< 0.1$  ppm  $\text{H}_2\text{O}$  and  $< 0.1$  ppm  $\text{O}_2$ ). Hexane (hex; Sigma-Aldrich, HPLC grade) and toluene (Sigma-Aldrich; HPLC grade) were purified using an MBraun SPS-800 solvent system. All dry solvents were stored under argon in gas-tight ampoules.  $d_8$ -Toluene (Sigma-Aldrich, 99.5%) and  $\text{C}_6\text{D}_6$  (Sigma-Aldrich, 99.5%) were degassed and stored over 3 Å molecular sieves.  $\text{B}(\text{C}_6\text{F}_5)_3$ , phenyl isocyanate, cyclohexyl isocyanate, allyl isocyanate, 4-bromophenyl isocyanate, 4-chlorophenyl isocyanate, 4-nitrophenyl isocyanate, 4-methoxyphenyl isocyanate, benzyl isocyanate, 2-(trifluoromethyl)phenyl isocyanate were purchased from either Sigma-Aldrich or Alfa Aesar and used without further purification. Whereas,  $\text{Al}(\text{C}_6\text{F}_5)_3$  and  $\text{Ga}(\text{C}_6\text{F}_5)_3$  were prepared according to known procedures.<sup>[1,2]</sup>

*Additional characterization techniques:*  $^1\text{H}$ ,  $^{13}\text{C}$ ,  $^{11}\text{B}$ ,  $^{19}\text{F}$  NMR spectra were acquired at 298 K with a Bruker Ascend 400 NMR spectrometer and with a Bruker AV III 500 MHz NMR spectrometer.  $^1\text{H}$  and  $^{13}\text{C}$  NMR spectra were referenced to the most downfield solvent resonance.  $^{11}\text{B}$  and  $^{19}\text{F}$  spectra were externally referenced to  $\text{BF}_3 \cdot \text{Et}_2\text{O}$  in  $\text{C}_6\text{D}_6$  and  $\text{CFCl}_3$  ( $\delta = 0$  ppm), respectively. Multiplicity is indicated using the following abbreviations: b = broad, s = singlet, d = doublet, t = triplet, and q = quartet.  $^{13}\text{C}$  NMR resonances for  $\text{C}_6\text{F}_5$  could not always be observed. Elemental analyses were carried out by Elemental Microanalyses Ltd. (Devon, U.K.). Samples (approx. 5 mg) were submitted in sealed Pyrex ampoules. In cases where elemental analysis data deviate significantly from expected values, the best obtainable analysis is presented.

### 1.2. X-ray Diffraction Studies

Single crystal X-ray structure determination: Single-crystal X-ray diffraction data were collected using an Oxford Diffraction Supernova dual-source diffractometer equipped with a 135 mm Atlas CCD area detector. Crystals were selected under Paratone-N oil, mounted on micromount loops and quench-cooled using an Oxford Cryosystems open flow  $\text{N}_2$  cooling device.<sup>[3]</sup> Data were collected at 150 K using mirror monochromated  $\text{Cu K}\alpha$  radiation ( $\lambda = 1.5418$  Å; Oxford Diffraction Supernova). Data collected on the Oxford Diffraction

Supernova diffractometer were processed using the CrysAlisPro package, including unit cell parameter refinement and inter-frame scaling (which was carried out using SCALE3 ABSPACK within CrysAlisPro).<sup>[4]</sup> Equivalent reflections were merged and diffraction patterns processed with the CrysAlisPro suite. Structures were subsequently solved using direct methods and refined on  $F^2$  using the ShelXL 2013 package and ShelXle.<sup>[5,6]</sup>

### 1.3. Kinetic Studies

A stock solution of **1a** was prepared by dissolving 0.2 g of **1a** (25 mg/ sample, 0.03 mmol) in 4 mL of  $d_8$ -toluene. The NMR instrument was pre-warmed to 353 K, pre-locked, pre-tuned, and pre-shimmed to a dummy sample. To an air tight J. Young NMR tube 0.5 mL of stock solution was added along with the appropriate equivalents of CyNCO using a micro-syringe. The sample was cooled to 4 °C before being quickly inserted into the NMR instrument. The sample was shimmed and monitored by  $^{19}\text{F}\{^1\text{H}\}$  NMR spectroscopy.

### 1.4. Thermodynamic Studies

A stock solution of **1a** was prepared by dissolving 0.2 g of **1a** (25 mg/ sample, 0.03 mmol) in 4 mL of  $d_8$ -toluene. The NMR instrument was pre-warmed to the appropriate temperature. To an air tight J. Young NMR tube 0.5 mL of stock solution was added along with 4.3  $\mu\text{L}$  of CyNCO (0.03 mmol, 1 eq) using a microsyringe. The sample was inserted into the NMR instrument and monitored by  $^{19}\text{F}\{^1\text{H}\}$  NMR spectroscopy until equilibrium was reached.

### 1.5. Computational Studies

All calculations were performed with the Gaussian09 program package3 (version g09, rev.d01). The theoretical approach is based on the framework of density functional theory (DFT).<sup>[7,8]</sup> All calculations were performed with the PBE1PBE functional and employing 6-31G(d,p) basis set. Transition states and ground states were fully optimized without constraints at the corresponding level of theory and uniquely characterized by occurrence of one or none imaginary frequency respectively and verified by the corresponding frequency calculation. The imaginary frequencies for the transition state calculations can be found together with the  $x,y,z$  coordinates. Gibbs free reaction energies and enthalpies were calculated for standard conditions ( $p = 1 \text{ atm}$ ,  $T = 298 \text{ K}$ ) and are unscaled. Geometry optimizations were performed using the Gaussian 09, Revision D.01.<sup>[9,10]</sup>

## 1.6. General Procedure for Scrambled Products

A solution of **1b** (50 mg, 0.07 mmol) and isocyanate (0.7 mmol, 10 eq) in toluene (0.5 mL) was sealed in an air tight J. Young NMR tube and heated to 110 °C overnight. The solution was cooled to room temperature and solvent removed under reduced pressure. Crystals suitable for X-ray diffraction studies could be obtained by extracting the product in hexane.

## 2. Synthesis and Characterization Data

### 2.1. Compound 1a

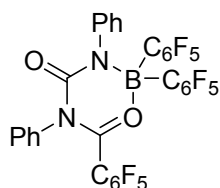

In a Schlenk flask charged with a stir bar  $B(C_6F_5)_3$  (1.0 g, 2.0 mmol) was dissolved in 30 mL of toluene. To this mixture PhNCO (1.0 g, 8.4 mmol, 4.2 eq) was added dropwise and stirred overnight. The solvent was removed under reduced pressure to give a pale yellow oil, which was further washed with hexane ( $3 \times 20$  mL) to yield a white precipitate. Crystals suitable for X-ray diffraction studies could be obtained from the hexane filtrate.

**$^1H$  NMR (500 MHz,  $C_6D_6$ ):**  $\delta$  = 7.36 (d,  $^3J_{H-H}$  = 7.5 Hz, 2H, *Ph*), 6.96 (m, 2H, *Ph*), 6.92 (m, 2H, *Ph*), 6.77 (m, 1H, *Ph*), 6.62 (m, 3H, *Ph*);  **$^{19}F\{^1H\}$  NMR (377 MHz,  $C_6D_6$ ):**  $\delta$  = -135.0 (d,  $^3J_{F-F}$  = 22 Hz, 4F, *o*- $C_6F_5$ ), -139.1 (d,  $^3J_{F-F}$  = 20 Hz, 2F, *o*- $C_6F_5$ ), -142.8 (t,  $^3J_{F-F}$  = 22 Hz, 1F, *p*- $C_6F_5$ ), -153.2 (t,  $^3J_{F-F}$  = 21 Hz, 2F, *p*- $C_6F_5$ ), -157.4 (m, 2F, *m*- $C_6F_5$ ), -162.5 (td,  $^3J_{F-F}$  = 23, 9.4 Hz, 4F, *m*- $C_6F_5$ );  **$^{11}B\{^1H\}$  NMR (128 MHz,  $C_6D_6$ ):**  $\delta$  = 4.0 (s);  **$^{13}C\{^1H\}$  NMR (126 MHz,  $C_6D_6$ ):**  $\delta$  = 166.7 (s, NCN), 148.5 (bd,  $^1J_{C-F}$  = 245 Hz,  $C_6F_5$ ), 147.7 (s, *Ph*), 142.3 (bd,  $^1J_{C-F}$  = 258 Hz,  $C_6F_5$ ), 141.2 (bd,  $^1J_{C-F}$  = 247 Hz,  $C_6F_5$ ), 139.7 (s, *Ph*), 137.5 (bd,  $^1J_{C-F}$  = 250 Hz,  $C_6F_5$ ), 133.6 (s, *Ph*), 130.9 (s, *Ph*), 129.4 (s, *Ph*), 128.9 (s, *Ph*), 127.1 (s, *Ph*), 126.4 (s, *Ph*), 105.6 (s, NCO) ppm.

**Isolated Yield** = 68%.

**Elemental analysis** for  $C_{32}H_{10}BF_{15}N_2O_2$ : calcd.: C 51.23, H 1.34, N 3.73; found: C 51.07, H 1.31, N 3.82.

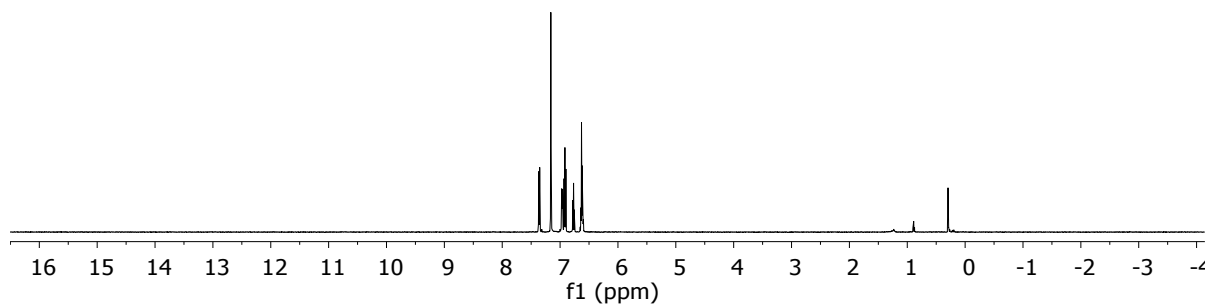

**Figure S1.**  $^1\text{H}$  NMR spectrum ( $\text{C}_6\text{D}_6$ ) of **1a**.

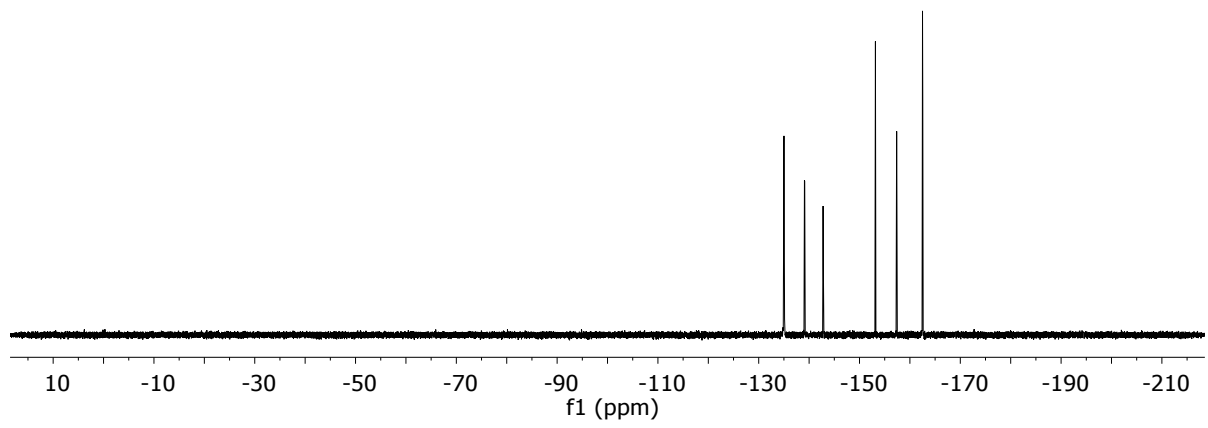

**Figure S2.**  $^{19}\text{F}\{^1\text{H}\}$  NMR spectrum ( $\text{C}_6\text{D}_6$ ) of **1a**.

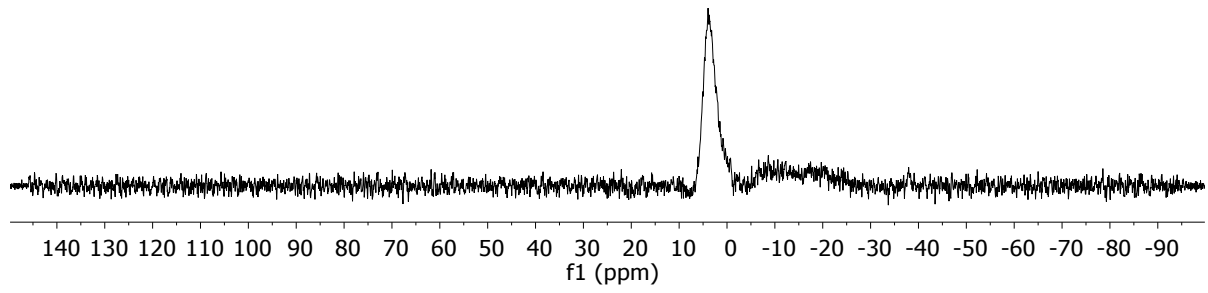

**Figure S3.**  $^{11}\text{B}\{^1\text{H}\}$  NMR spectrum ( $\text{C}_6\text{D}_6$ ) of **1a**.

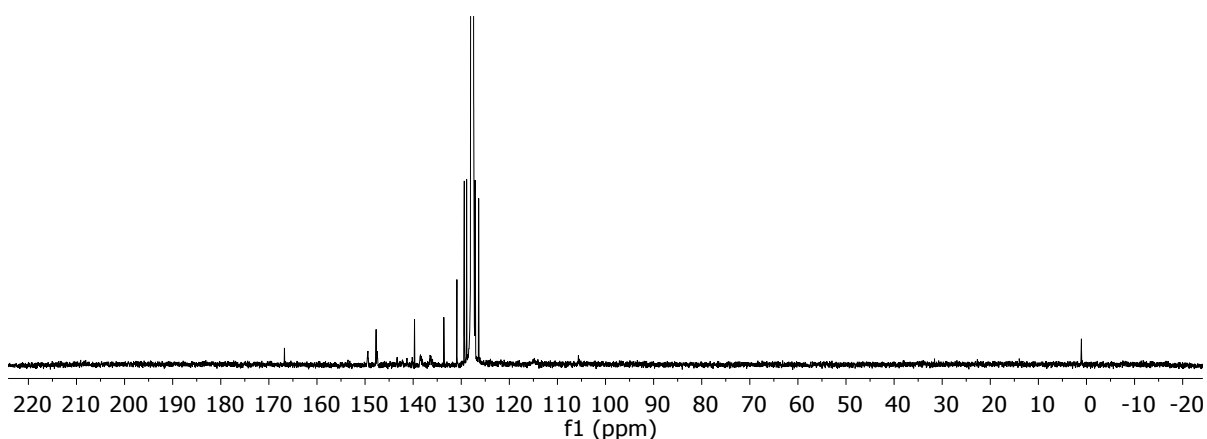

**Figure S4.**  $^{13}\text{C}\{^1\text{H}\}$  NMR spectrum ( $\text{C}_6\text{D}_6$ ) of **1a**.

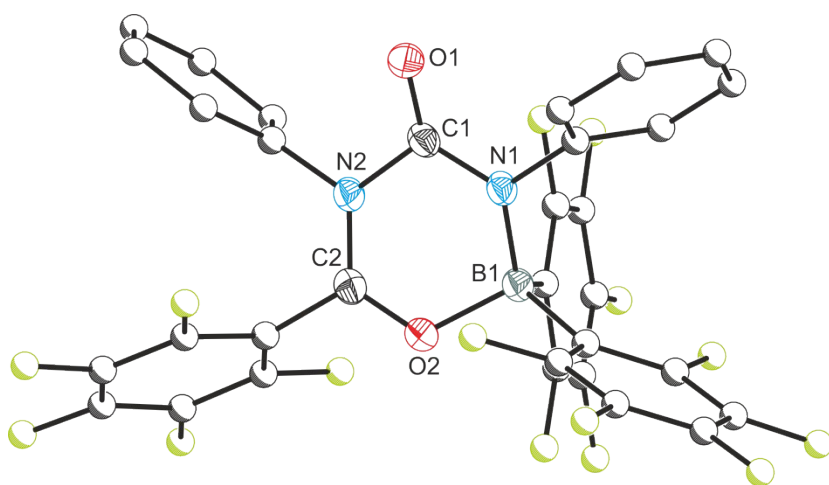

**Figure S5.** Single crystal X-ray structure of **1a**. Atoms of the Ph and  $\text{C}_6\text{F}_5$  moieties are pictured as spheres of arbitrary radius. Anisotropic displacement ellipsoids pictured at 50% probability. Hydrogen atoms omitted for clarity.

## 2.2. Compound 1b

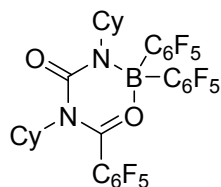

In a Schlenk flask charged with a stir bar  $\text{B}(\text{C}_6\text{F}_5)_3$  (1.0 g, 2.0 mmol) was dissolved in 30 mL of toluene. To this mixture  $\text{CyNCO}$  (1.0 g, 8.0 mmol, 4 eq) was added dropwise and stirred overnight. Crystals suitable for X-ray diffraction studies grew from the solution overnight. The solvent was decanted and the product dried under reduced pressure to yield a white precipitate.

**$^1\text{H}$  NMR (500 MHz,  $\text{C}_6\text{D}_6$ ):**  $\delta$  = 3.28 (m, 2H, Cy), 2.47 (qd,  $^3J_{\text{H-H}} = 12.8, 3.8$  Hz, 2H, Cy), 2.36 (bq,  $^3J_{\text{H-H}} = 12.7$  Hz, 2H, Cy), 1.84 (bd,  $^3J_{\text{H-H}} = 12.0$  Hz, 2H, Cy), 1.58 (m, 4H, Cy), 1.38 (m, 3H, Cy), 1.15 (d,  $^3J_{\text{H-H}} = 10.0$  Hz, 1H, Cy), 0.95 (m, 4H, Cy), 0.81 (qt,  $^3J_{\text{H-H}} = 13.2, 3.5$  Hz, 1H, Cy), 0.60 (dddd,  $^3J_{\text{H-H}} = 17.2, 13.5, 8.4, 3.6$  Hz, 2H, Cy);  **$^{19}\text{F}\{^1\text{H}\}$  NMR (377 MHz,  $\text{C}_6\text{D}_6$ ):**  $\delta$  = -134.0 (d,  $^3J_{\text{F-F}} = 23$  Hz, 4F, *o*- $\text{C}_6\text{F}_5$ ), -40.3 (m, 2F, *o*- $\text{C}_6\text{F}_5$ ), -143.6 (t,  $^3J_{\text{F-F}} = 21$  Hz, 1F, *p*- $\text{C}_6\text{F}_5$ ), -154.1 (t,  $^3J_{\text{F-F}} = 20$  Hz, 2F, *p*- $\text{C}_6\text{F}_5$ ), -156.7 (m, 2F, *m*- $\text{C}_6\text{F}_5$ ), -162.9 (m, 4F, *m*- $\text{C}_6\text{F}_5$ );  **$^{11}\text{B}\{^1\text{H}\}$  NMR (128 MHz,  $\text{C}_6\text{D}_6$ ):**  $\delta$  = 2.7 (s);  **$^{13}\text{C}\{^1\text{H}\}$  NMR (126 MHz,  $\text{C}_6\text{D}_6$ ):**  $\delta$  = 164.5 (s, NCN), 148.6 (bd,  $^1J_{\text{C-F}} = 239$  Hz,  $\text{C}_6\text{F}_5$ ), 146.2 (s, NCO), 137.4 (bd,  $^3J_{\text{C-F}} = 251$  Hz,  $\text{C}_6\text{F}_5$ ), 66.0 (s, Cy), 59.7 (s, Cy), 30.6 (s, Cy), 29.2 (s, Cy), 26.4 (s, Cy), 25.7 (s, Cy), 25.4 (s, Cy), 24.3 (s, Cy) ppm.

**Isolated Yield** = 70%.

**Elemental analysis** for  $\text{C}_{32}\text{H}_{22}\text{BF}_{15}\text{N}_2\text{O}_2$ : calcd.: C 50.42, H 2.91, N 3.67; found: C 50.93, H 2.87, N 3.77.

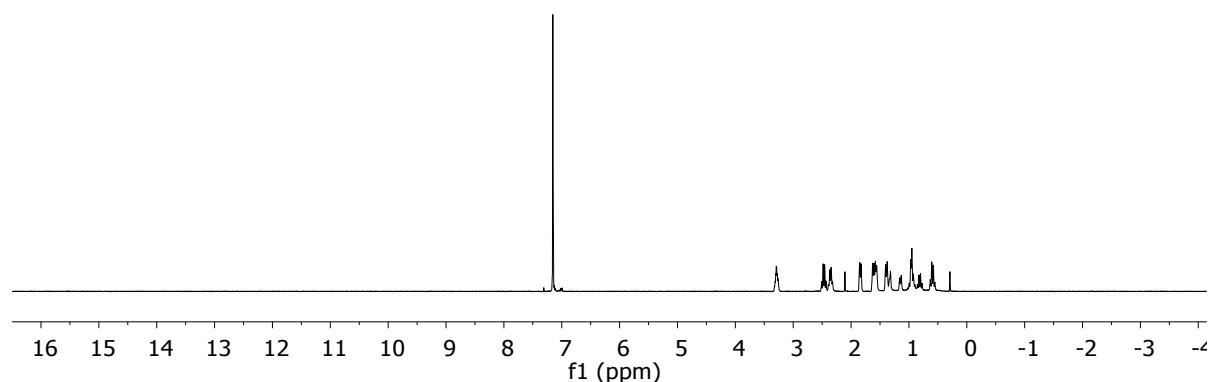

**Figure S6.**  $^1\text{H}$  NMR spectrum ( $\text{C}_6\text{D}_6$ ) of **1b**.

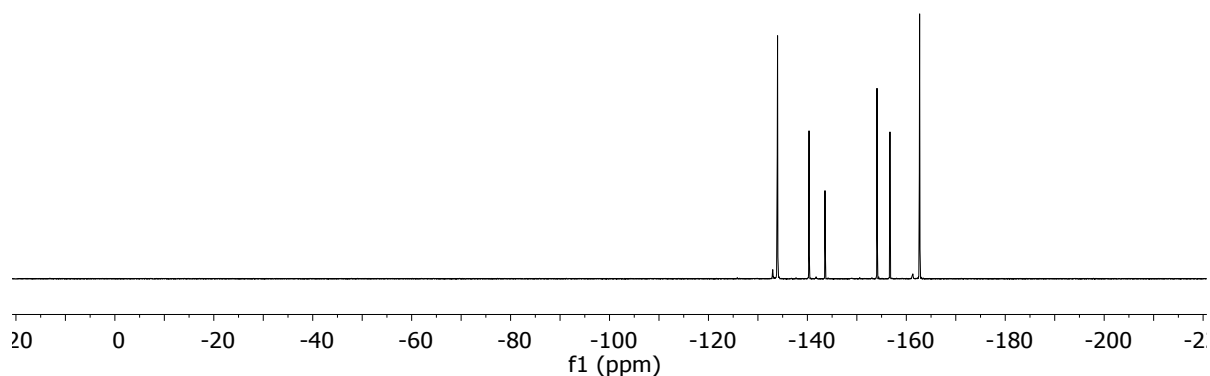

**Figure S7.**  $^{19}\text{F}\{^1\text{H}\}$  NMR spectrum ( $\text{C}_6\text{D}_6$ ) of **1b**.



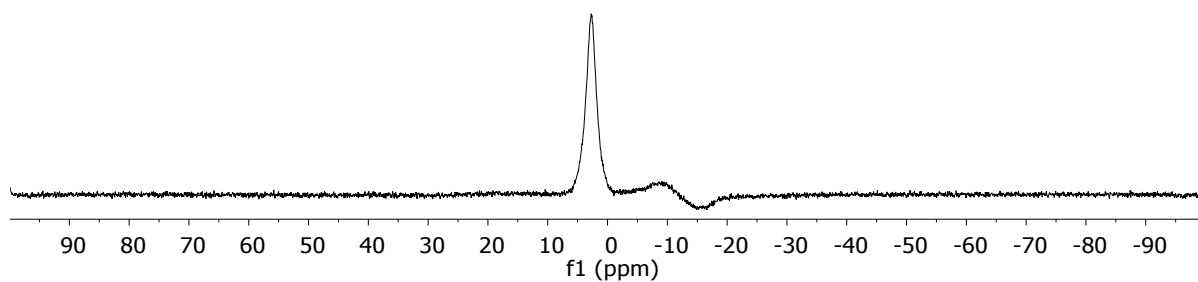

**Figure S8.**  $^{11}\text{B}\{^1\text{H}\}$  NMR spectrum ( $\text{C}_6\text{D}_6$ ) of **1b**.

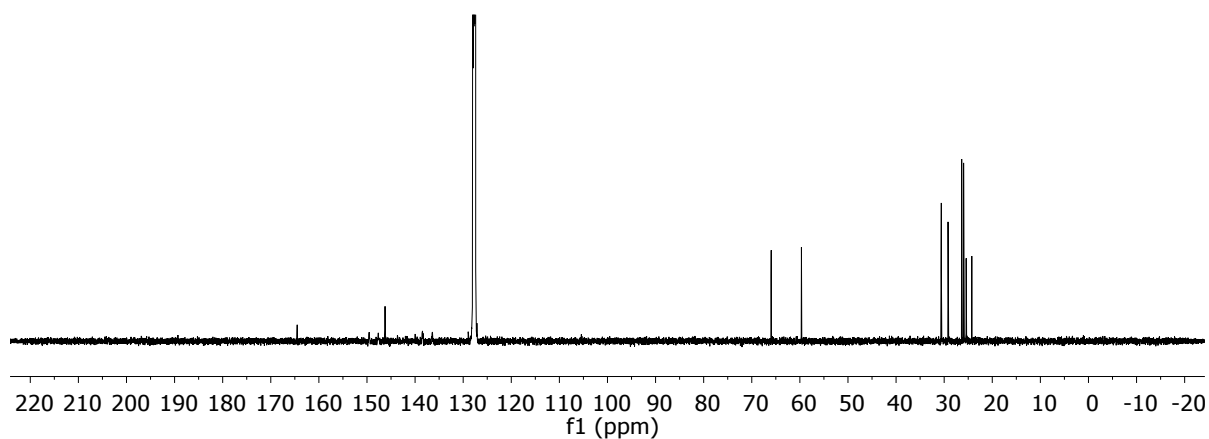

**Figure S9.**  $^{13}\text{C}\{^1\text{H}\}$  NMR spectrum ( $\text{C}_6\text{D}_6$ ) of **1b**.

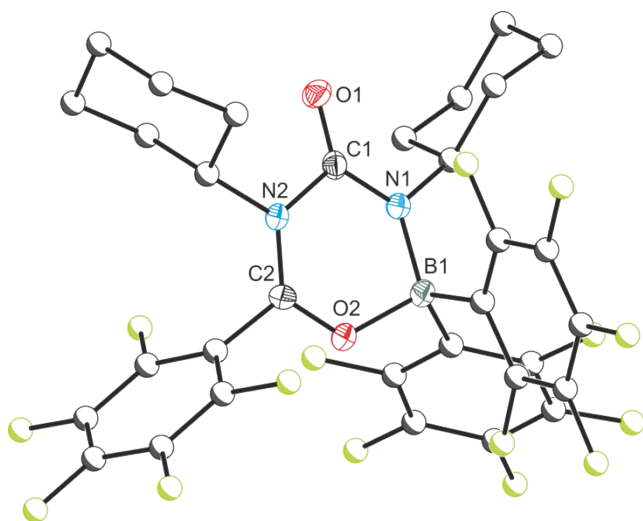

**Figure S10.** Single crystal X-ray structure of **1b**. Atoms of the Cy and  $\text{C}_6\text{F}_5$  moieties are pictured as spheres of arbitrary radius. Anisotropic displacement ellipsoids pictured at 50% probability. Hydrogen atoms omitted for clarity.

### 2.3. Compound 1c

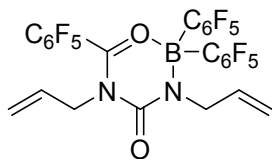

In a Schlenk flask charged with a stir bar  $B(C_6F_5)_3$  (1.0 g, 2.0 mmol) was dissolved in 30 mL of toluene. To this mixture allyl isocyanate (1.0 g, 10 mmol, 5 eq) was added dropwise and stirred overnight. The solvent was removed under reduced pressure to give a pale-yellow oil, which was further washed with hexane ( $3 \times 20$  mL) to yield a white precipitate. Crystals suitable for X-ray diffraction studies could be obtained from the hexane filtrate.

**$^1H$  NMR (500 MHz,  $C_6D_6$ ):**  $\delta$  = 5.59 (ddt,  $^3J_{H-H}$  = 16.5, 10.4, 5.9 Hz, 1H,  $CH_2CHCH_2$ ), 5.21 (ddt,  $^3J_{H-H}$  = 17.2, 10.7, 5.5 Hz, 1H,  $CH_2CHCH_2$ ), 4.64 (m, 3H,  $NCH_2CHCH_2$ ), 4.45 (m, 1H,  $NCH_2CHCH_2$ ), 3.34 (m, 4H,  $NCH_2CHCH_2$ );  **$^{19}F\{^1H\}$  NMR (377 MHz,  $C_6D_6$ ):**  $\delta$  = -136.1 (dd,  $^3J_{F-F}$  = 24, 9 Hz, 4F, *o*- $C_6F_5$ ), -139.3 (d,  $^3J_{F-F}$  = 18 Hz, 2F, *o*- $C_6F_5$ ), -143.1 (m, 1F, *p*- $C_6F_5$ ), -154.0 (t,  $^3J_{F-F}$  = 21 Hz, 2F, *p*- $C_6F_5$ ), -156.5 (dd,  $^3J_{F-F}$  = 22, 18 Hz, 2F, *m*- $C_6F_5$ ), -162.9 (m, 4F, *m*- $C_6F_5$ );  **$^{11}B\{^1H\}$  NMR (128 MHz,  $C_6D_6$ ):**  $\delta$  = 2.9 (s);  **$^{13}C\{^1H\}$  NMR (126 MHz,  $C_6D_6$ ):**  $\delta$  = 165.3 (s, NCN), 148.51 (bd,  $^1J_{C-F}$  = 246 Hz,  $C_6F_5$ ), 143.8 (bd,  $^1J_{C-F}$  = 275 Hz,  $C_6F_5$ ), 142.7 (bd,  $^1J_{C-F}$  = 256 Hz,  $C_6F_5$ ), 141.1 (bd,  $^1J_{C-F}$  = 253 Hz,  $C_6F_5$ ), 137.4 (bd,  $^1J_{C-F}$  = 249 Hz,  $C_6F_5$ ), 132.0 (s,  $NCH_2CHCH_2$ ), 129.5 (s,  $NCH_2CHCH_2$ ), 118.8 (s,  $NCH_2CHCH_2$ ), 116.3 (s,  $NCH_2CHCH_2$ ), 48.8 (s,  $NCH_2CHCH_2$ ), 48.5 (s,  $NCH_2CHCH_2$ ) ppm.

**Isolated Yield** = 63%.

**Elemental analysis** for  $C_{26}H_{10}BF_{15}N_2O_2$ : calcd.: C 46.05, H 1.49, N 4.13; found: C 45.96, H 1.48, N 4.21.

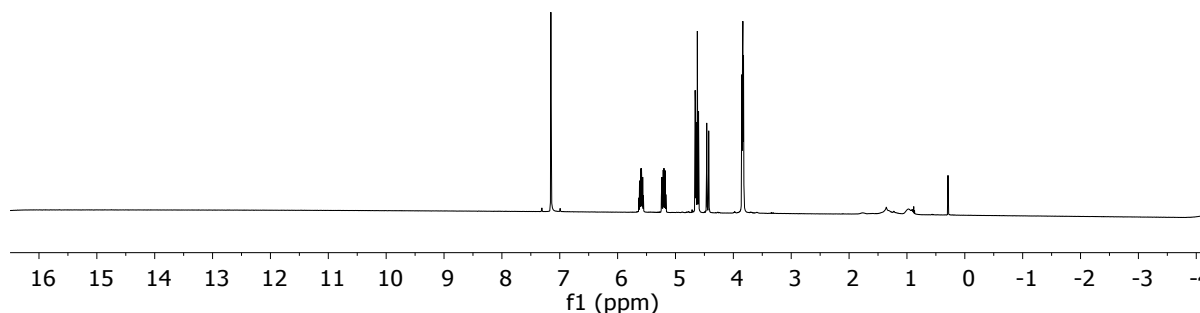

**Figure S11.**  $^1H$  NMR spectrum ( $C_6D_6$ ) of **1c**.

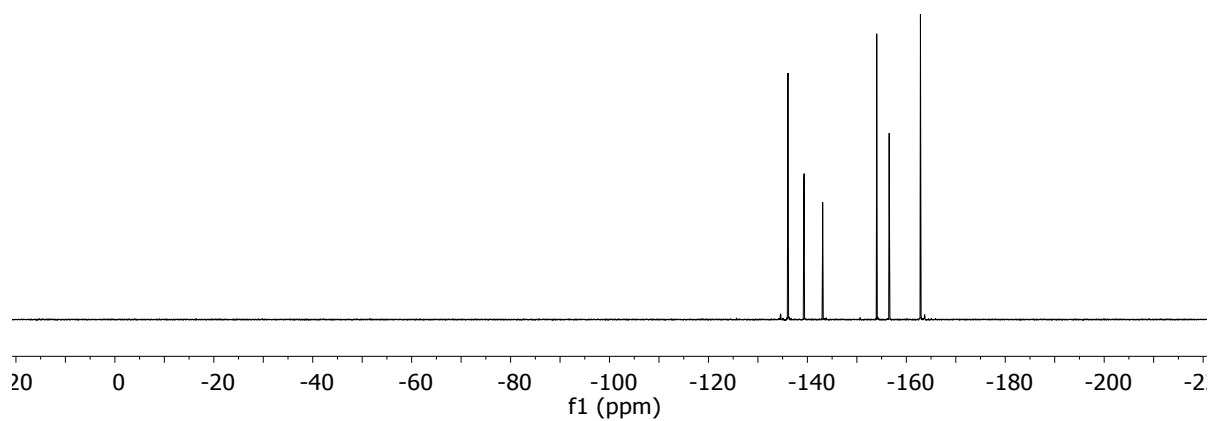

**Figure S12.**  $^{19}\text{F}\{^1\text{H}\}$  NMR spectrum ( $\text{C}_6\text{D}_6$ ) of **1c**.

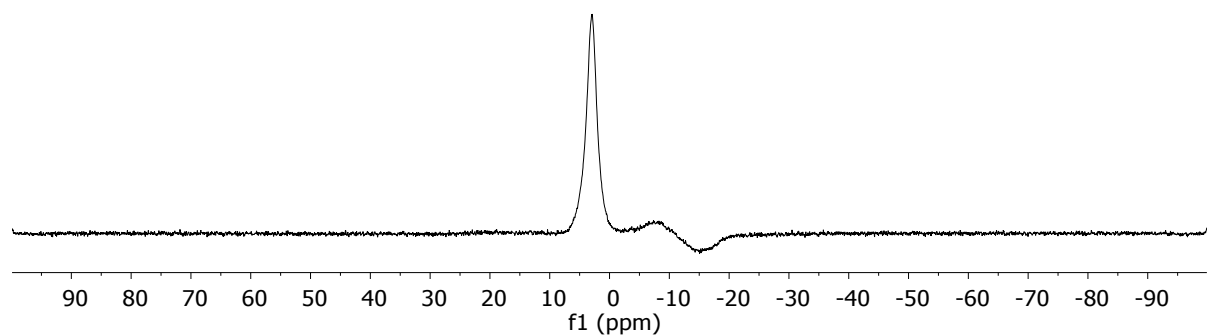

**Figure S13.**  $^{11}\text{B}\{^1\text{H}\}$  NMR spectrum ( $\text{C}_6\text{D}_6$ ) of **1c**.

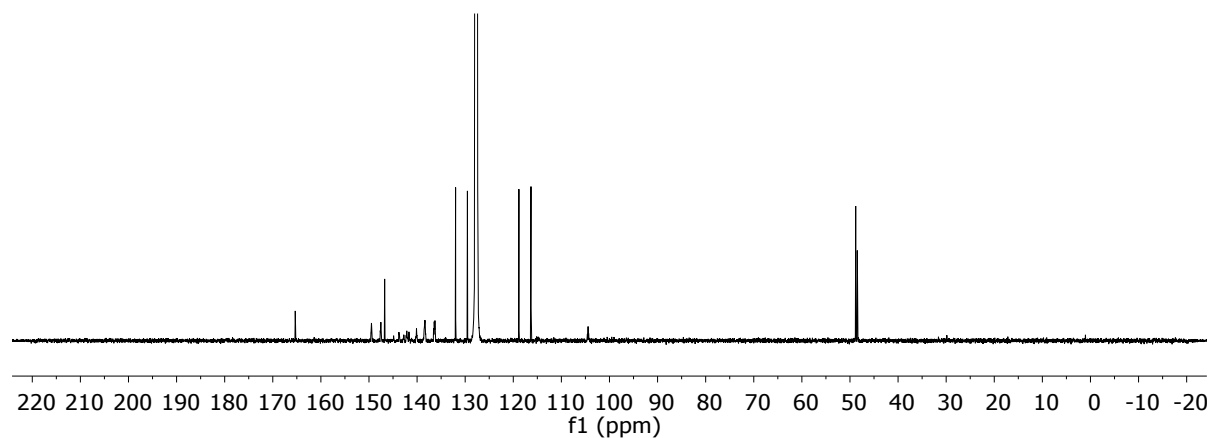

**Figure S14.**  $^{13}\text{C}\{^1\text{H}\}$  NMR spectrum ( $\text{C}_6\text{D}_6$ ) of **1c**.

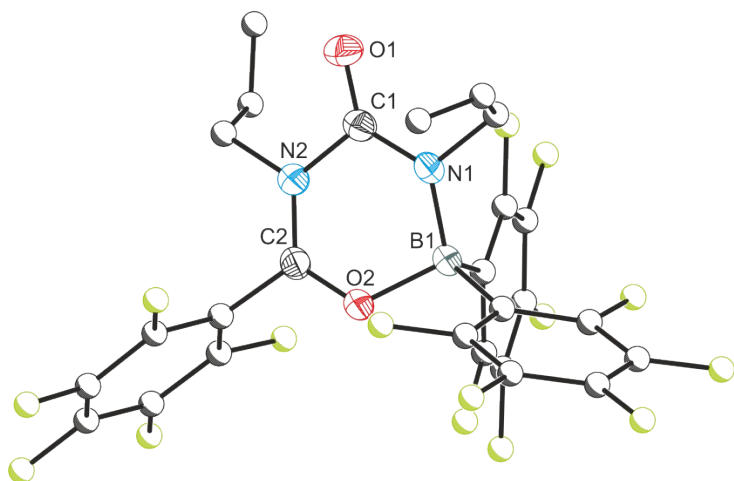

**Figure S15.** Single crystal X-ray structure of **1c**. Atoms of the allyl and C<sub>6</sub>F<sub>5</sub> moieties are pictured as spheres of arbitrary radius. Anisotropic displacement ellipsoids pictured at 50% probability. Hydrogen atoms omitted for clarity.

#### 2.4. Compound 2

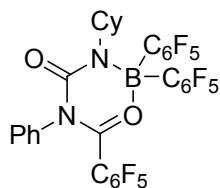

**<sup>1</sup>H NMR (500 MHz, C<sub>6</sub>D<sub>6</sub>):**  $\delta$  = 7.30 (d, <sup>3</sup>J<sub>H-H</sub> = 8.5 Hz, 2H, *Ph*), 6.91 (dd, <sup>3</sup>J<sub>H-H</sub> = 8.5, 7.4 Hz, 2H, *Ph*), 6.76 (t, <sup>3</sup>J<sub>H-H</sub> = 7.4 Hz, 1H, *Ph*), 3.33 (tt, <sup>3</sup>J<sub>H-H</sub> = 12.1, 3.5 Hz, 1H, *Cy*), 2.45 (qd, <sup>3</sup>J<sub>H-H</sub> = 12.7, 3.8 Hz, 1H, *Cy*), 1.63 (m, 1H, *Cy*), 1.34 (d, <sup>3</sup>J<sub>H-H</sub> = 12.8 Hz, 1H, *Cy*), 1.23 (m, 2H, *Cy*), 1.09 (d, <sup>3</sup>J<sub>H-H</sub> = 13.5 Hz, 1H, *Cy*), 0.88 (t, <sup>3</sup>J<sub>H-H</sub> = 7.0 Hz, 2H, *Cy*), 0.71 (qt, <sup>3</sup>J<sub>H-H</sub> = 13.1, 3.1 Hz, 1H, *Cy*), 0.56 (qt, <sup>3</sup>J<sub>H-H</sub> = 13.3, 3.6 Hz, 1H, *Cy*); **<sup>19</sup>F{<sup>1</sup>H} NMR (377 MHz, C<sub>6</sub>D<sub>6</sub>):**  $\delta$  = -135.0 (d, <sup>3</sup>J<sub>F-F</sub> = 23 Hz, 4F, *o*-C<sub>6</sub>F<sub>5</sub>), -140.3 (d, <sup>3</sup>J<sub>F-F</sub> = 20 Hz, 2F, *o*-C<sub>6</sub>F<sub>5</sub>), -142.7 (m, 1F, *p*-C<sub>6</sub>F<sub>5</sub>), -153.5 (t, <sup>3</sup>J<sub>F-F</sub> = 21 Hz, 2F, *p*-C<sub>6</sub>F<sub>5</sub>), -156.2 (m, 2F, *m*-C<sub>6</sub>F<sub>5</sub>), -162.8 (m, 4F, *m*-C<sub>6</sub>F<sub>5</sub>); **<sup>11</sup>B{<sup>1</sup>H} NMR (128 MHz, C<sub>6</sub>D<sub>6</sub>):**  $\delta$  = 3.4 (s); **<sup>13</sup>C{<sup>1</sup>H} NMR (126 MHz, C<sub>6</sub>D<sub>6</sub>):**  $\delta$  = 165.9 (s, NCN), 148.3 (bd, <sup>1</sup>J<sub>C-F</sub> = 244 Hz, C<sub>6</sub>F<sub>5</sub>), 147.8 (s, *Ph*), 142.9 (bd, <sup>1</sup>J<sub>C-F</sub> = 222 Hz, C<sub>6</sub>F<sub>5</sub>), 140.9 (bd, <sup>1</sup>J<sub>C-F</sub> = 213 Hz, C<sub>6</sub>F<sub>5</sub>), 139.9 (s, *Ph*), 137.5 (bd, <sup>1</sup>J<sub>C-F</sub> = 256 Hz, C<sub>6</sub>F<sub>5</sub>), 128.7 (s, *Ph*), 127.2 (s, *Ph*), 126.4 (s, *Ph*), 66.4 (s, NCO), 31.6 (s, *Cy*), 30.5 (s, *Cy*), 25.9 (s, *Cy*), 24.1 (s, *Cy*), 22.7 (s, *Cy*), 14.0 (s, *Cy*) ppm.

**Isolated Yield** = 16%.

**Elemental analysis** for C<sub>32</sub>H<sub>16</sub>BF<sub>15</sub>N<sub>2</sub>O<sub>2</sub>: calcd.: C 50.82, H 2.13, N 3.70; found: C 51.63, H 2.35, N 3.95.

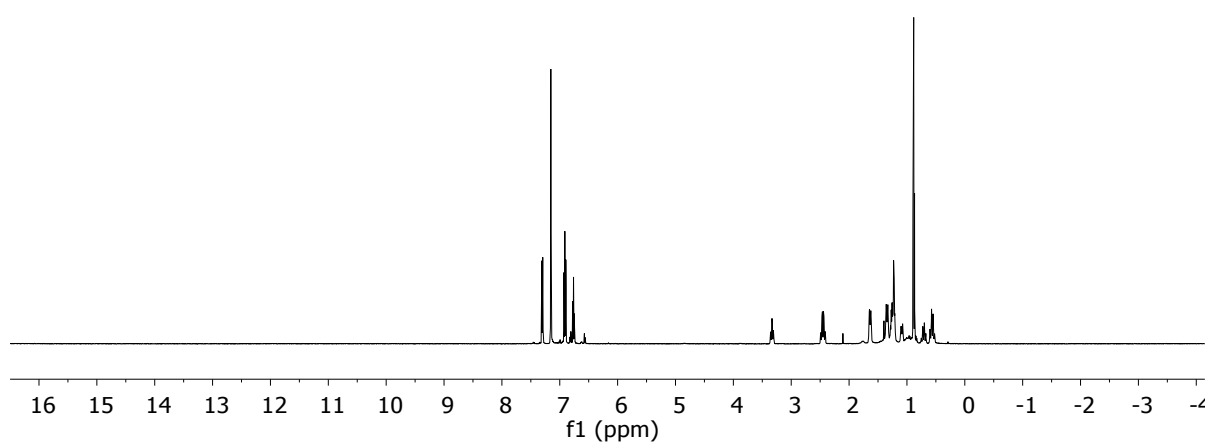

**Figure S16.**  $^1\text{H}$  NMR spectrum ( $\text{C}_6\text{D}_6$ ) of **2**.

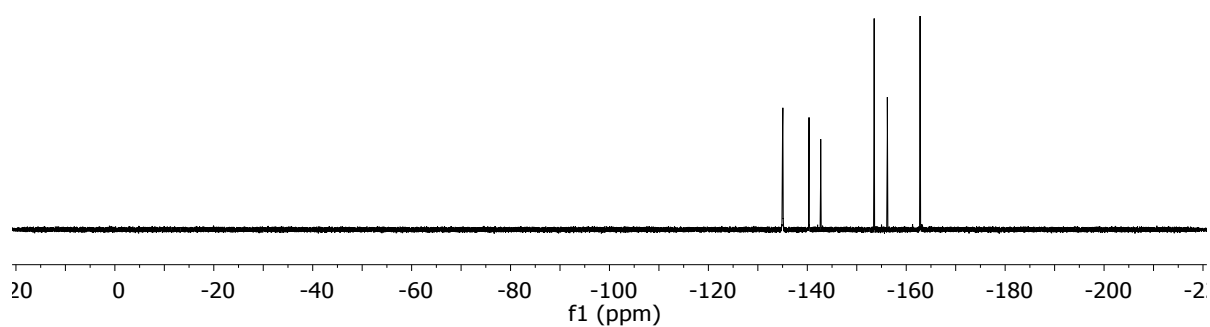

**Figure S17.**  $^{19}\text{F}\{^1\text{H}\}$  NMR spectrum ( $\text{C}_6\text{D}_6$ ) of **2**.

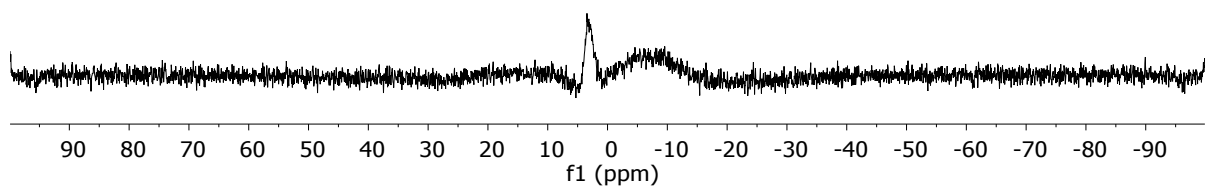

**Figure S18.**  $^{11}\text{B}\{^1\text{H}\}$  NMR spectrum ( $\text{C}_6\text{D}_6$ ) of **2**.

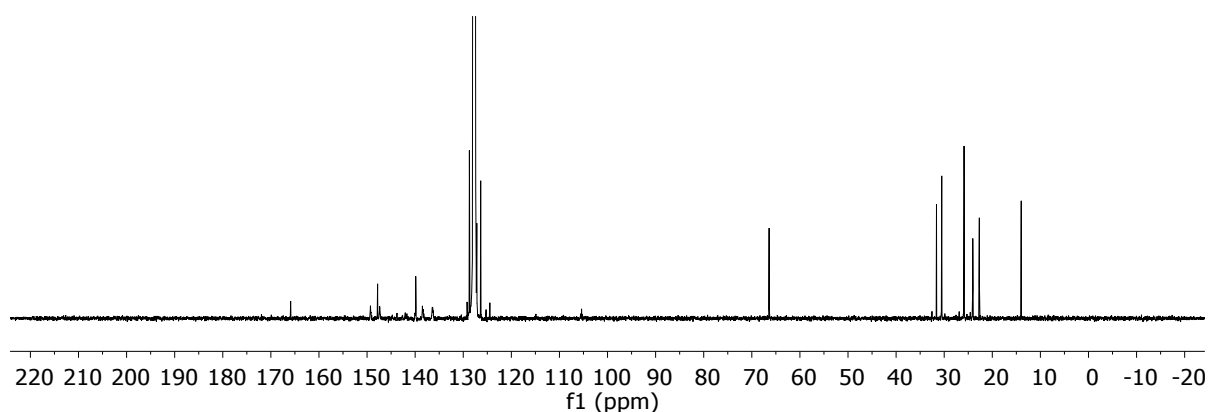

**Figure S19.**  $^{13}\text{C}\{^1\text{H}\}$  NMR spectrum ( $\text{C}_6\text{D}_6$ ) of **2**.

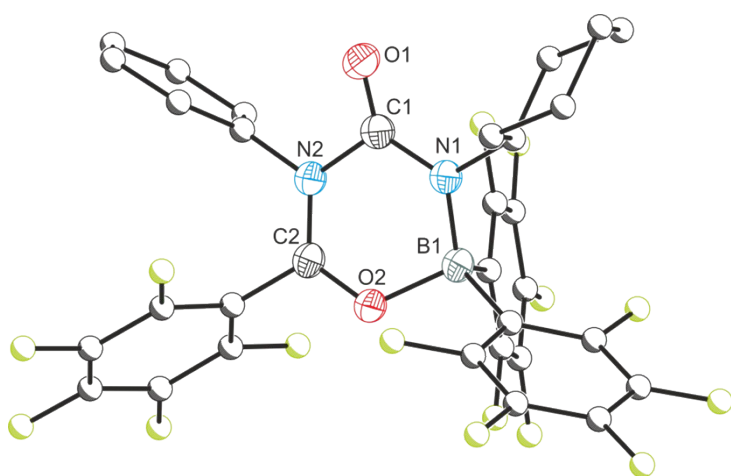

**Figure S20.** Single crystal X-ray structure of **2**. Atoms of the Cy, Ph and  $\text{C}_6\text{F}_5$  moieties are pictured as spheres of arbitrary radius. Anisotropic displacement ellipsoids pictured at 50% probability. Hydrogen atoms omitted for clarity.

## 2.5. Compound 3a

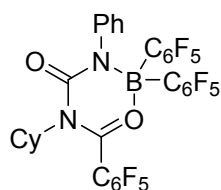

$^1\text{H}$  NMR (500 MHz,  $\text{C}_6\text{D}_6$ ):  $\delta$  = 7.30 (d,  $^3J_{\text{H-H}} = 7.9$  Hz, 2H, *Ph*), 6.91 (t,  $^3J_{\text{H-H}} = 7.9$  Hz, 2H, *Ph*), 6.76 (t,  $^3J_{\text{H-H}} = 7.4$  Hz, 1H, *Ph*), 3.33 (tt,  $^3J_{\text{H-H}} = 12.0, 3.7$  Hz, 1H, *Cy*), 2.45 (qd,  $^3J_{\text{H-H}} = 12.6, 3.8$  Hz, 1H, *Cy*), 1.65 (m, 1H, *Cy*), 1.34 (d,  $^3J_{\text{H-H}} = 13.3$  Hz, 1H, *Cy*), 1.25 (m, 2H, *Cy*), 1.09 (d,  $^3J_{\text{H-H}} = 13.3$  Hz, 1H, *Cy*), 0.88 (t,  $^3J_{\text{H-H}} = 7.0$  Hz, 2H, *Cy*), 0.72 (m, 1H, *Cy*), 0.56 (qt,  $^3J_{\text{H-H}} = 13.0, 3.3$  Hz, 1H, *Cy*);  $^{19}\text{F}\{^1\text{H}\}$  NMR (377 MHz,  $\text{C}_6\text{D}_6$ ):  $\delta$  = -135.0 (d,  $^3J_{\text{F-F}} = 9$  Hz,

4F, *o*-C<sub>6</sub>F<sub>5</sub>), -140.3 (d, <sup>3</sup>J<sub>F-F</sub> = 19 Hz, 2F, *o*-C<sub>6</sub>F<sub>5</sub>), -142.7 (t, <sup>3</sup>J<sub>F-F</sub> = 22 Hz, 1F, *p*-C<sub>6</sub>F<sub>5</sub>), -153.5 (t, <sup>3</sup>J<sub>F-F</sub> = 21 Hz, 2F, *p*-C<sub>6</sub>F<sub>5</sub>), -156.2 (m, 2F, *m*-C<sub>6</sub>F<sub>5</sub>), -162.8 (td, <sup>3</sup>J<sub>F-F</sub> = 21, 9 Hz, 4F, *m*-C<sub>6</sub>F<sub>5</sub>); <sup>11</sup>B{<sup>1</sup>H} NMR (128 MHz, C<sub>6</sub>D<sub>6</sub>): δ = 3.5 (s); <sup>13</sup>C{<sup>1</sup>H} NMR (126 MHz, C<sub>6</sub>D<sub>6</sub>): δ = 165.9 (s, NCN), 148.3 (bd, <sup>1</sup>J<sub>C-F</sub> = 254 Hz, C<sub>6</sub>F<sub>5</sub>), 147.8 (s, *Ph*), 142.79 (bd, <sup>1</sup>J<sub>C-F</sub> = 258 Hz, C<sub>6</sub>F<sub>5</sub>), 139.9 (s, *Ph*), 137.4 (bd, <sup>1</sup>J<sub>CF</sub> = 243 Hz, C<sub>6</sub>F<sub>5</sub>), 128.7 (s, *Ph*), 127.2 (s, *Ph*), 126.4 (s, *Ph*), 66.4 (s, NCO), 31.6 (s, *Cy*), 30.5 (s, *Cy*), 25.9 (s, *Cy*), 24.1 (s, *Cy*), 22.7 (s, *Cy*), 13.9 (s, *Cy*) ppm.

**Isolated Yield** = 76%.

**Elemental analysis** for C<sub>32</sub>H<sub>16</sub>BF<sub>15</sub>N<sub>2</sub>O<sub>2</sub>: calcd.: C 50.82, H 2.13, N 3.70; found: C 51.30, H 2.15, N 3.84.

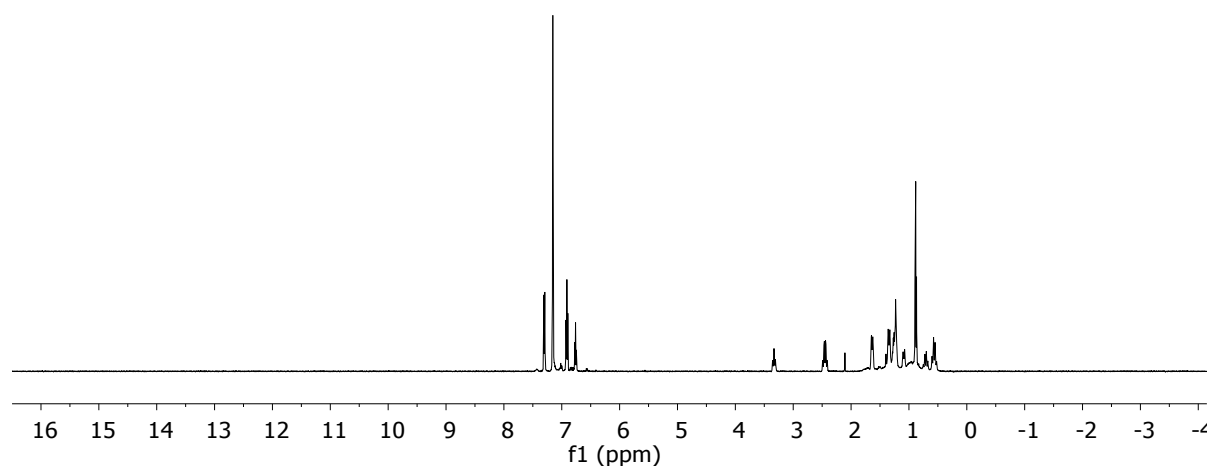

**Figure S21.** <sup>1</sup>H NMR spectrum (C<sub>6</sub>D<sub>6</sub>) of **3a**.

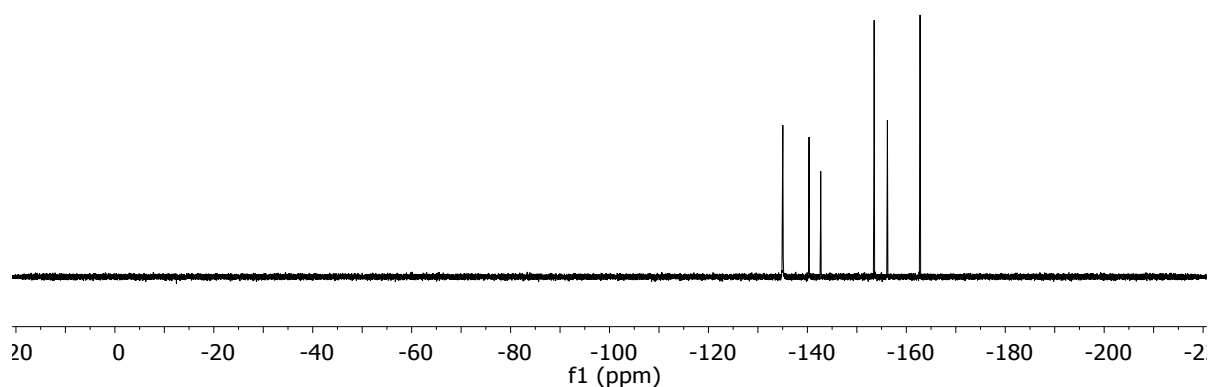

**Figure S22.** <sup>19</sup>F{<sup>1</sup>H} NMR spectrum (C<sub>6</sub>D<sub>6</sub>) of **3a**.

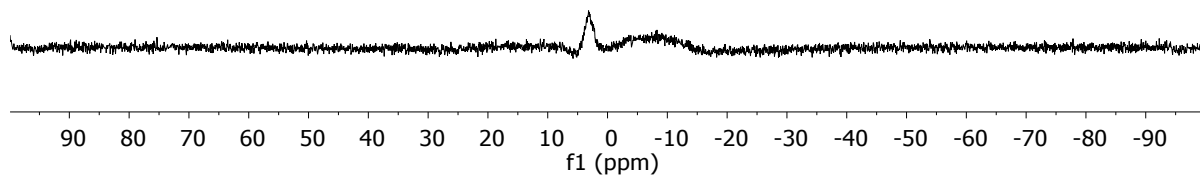

**Figure S23.**  $^{11}\text{B}\{^1\text{H}\}$  NMR spectrum ( $\text{C}_6\text{D}_6$ ) of **3a**.

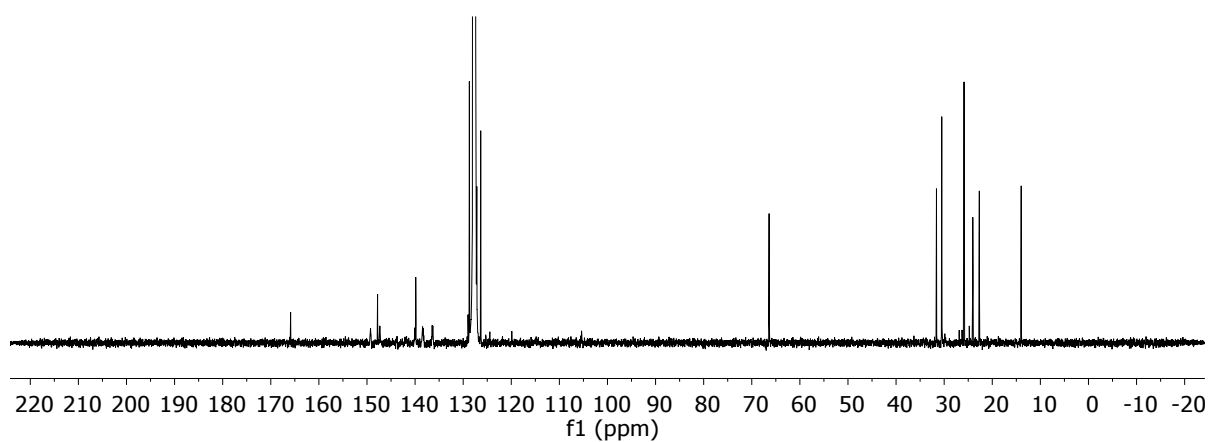

**Figure S24.**  $^{11}\text{C}\{^1\text{H}\}$  NMR spectrum ( $\text{C}_6\text{D}_6$ ) of **3a**.

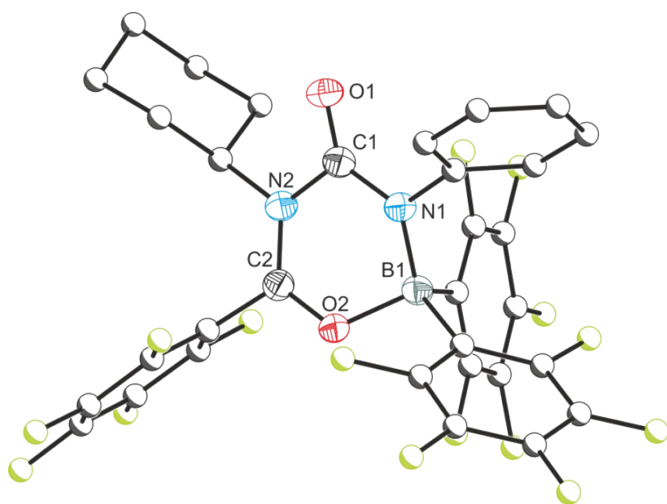

**Figure S25.** Single crystal X-ray structure of **3a**. . Atoms of the Cy, Ph and  $\text{C}_6\text{F}_5$  moieties are pictured as spheres of arbitrary radius. Anisotropic displacement ellipsoids pictured at 50% probability. Hydrogen atoms omitted for clarity.



## 2.6. Compound 3b

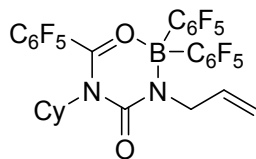

**<sup>1</sup>H NMR (500 MHz, C<sub>6</sub>D<sub>6</sub>):**  $\delta$  = 5.63 (m, 1H, NCH<sub>2</sub>CHCH<sub>2</sub>), 4.69 (b, 1H, NCH<sub>2</sub>CHCH<sub>2</sub>), 4.66 (dd, <sup>3</sup>J<sub>H-H</sub> = 8.6, 1.5 Hz, 1H, NCH<sub>2</sub>CHCH<sub>2</sub>), 3.85 (bd, <sup>3</sup>J<sub>H-H</sub> = 5.9 Hz, 2H, NCH<sub>2</sub>CHCH<sub>2</sub>), 3.26 (tt, <sup>3</sup>J<sub>H-H</sub> = 12.0, 3.7 Hz, 1H, Cy), 2.45 (qd, <sup>3</sup>J<sub>H-H</sub> = 12.7, 3.8 Hz, 2H, Cy), 1.50 (m, 1H, Cy), 1.35 (dt, <sup>3</sup>J<sub>H-H</sub> = 14.1, 3.3 Hz, 2H, Cy), 1.12 (dt, <sup>3</sup>J<sub>H-H</sub> = 13.4, 3.4 Hz, 1H, Cy), 0.96 (m, 1H, Cy), 0.78 (qt, <sup>3</sup>J<sub>H-H</sub> = 13.2, 3.6 Hz, 1H, Cy), 0.56 (qt, <sup>3</sup>J<sub>H-H</sub> = 13.3, 3.6 Hz, 2H, Cy); **<sup>19</sup>F{<sup>1</sup>H} NMR (377 MHz, C<sub>6</sub>D<sub>6</sub>):**  $\delta$  = -136.0 (dd, <sup>3</sup>J<sub>F-F</sub> = 23.9, 9.4 Hz, 4F, *o*-C<sub>6</sub>F<sub>5</sub>), -140.2 (d, <sup>3</sup>J<sub>F-F</sub> = 20 Hz, 2F, *o*-C<sub>6</sub>F<sub>5</sub>), -142.9 (t, <sup>3</sup>J<sub>F-F</sub> = 22 Hz, 1F, *p*-C<sub>6</sub>F<sub>5</sub>), -154.0 (t, <sup>3</sup>J<sub>F-F</sub> = 21 Hz, 2F, *p*-C<sub>6</sub>F<sub>5</sub>), -156.4 (m, 2F, *m*-C<sub>6</sub>F<sub>5</sub>), -136.0 (m, 4F, *m*-C<sub>6</sub>F<sub>5</sub>); **<sup>11</sup>B{<sup>1</sup>H} NMR (128 MHz, C<sub>6</sub>D<sub>6</sub>):**  $\delta$  = 2.4 (s); **<sup>13</sup>C{<sup>1</sup>H} NMR (126 MHz, C<sub>6</sub>D<sub>6</sub>):**  $\delta$  = 165.0 (s, NCN), 148.5 (bd, <sup>1</sup>J<sub>C-F</sub> = 239 Hz, C<sub>6</sub>F<sub>5</sub>), 143.7 (bd, <sup>1</sup>J<sub>C-F</sub> = 270 Hz, C<sub>6</sub>F<sub>5</sub>), 142.7 (bd, <sup>1</sup>J<sub>C-F</sub> = 260 Hz, C<sub>6</sub>F<sub>5</sub>), 141.1 (bd, <sup>1</sup>J<sub>C-F</sub> = 247 Hz, C<sub>6</sub>F<sub>5</sub>), 137.5 (bd, <sup>1</sup>J<sub>C-F</sub> = 256 Hz, C<sub>6</sub>F<sub>5</sub>), 132.2 (s, NCH<sub>2</sub>CHCH<sub>2</sub>), 116.6 (s, NCH<sub>2</sub>CHCH<sub>2</sub>), 66.3 (s, NCO), 48.2 (s, NCH<sub>2</sub>CHCH<sub>2</sub>), 30.4 (s, Cy), 25.9 (s, Cy), 24.1 (s, Cy) ppm.

**Isolated Yield** = 79%.

**Elemental analysis** for C<sub>29</sub>H<sub>16</sub>BF<sub>15</sub>N<sub>2</sub>O<sub>2</sub>: calcd.: C 48.36, H 2.24, N 3.89; found: C 48.12, H 2.26, N 4.17.

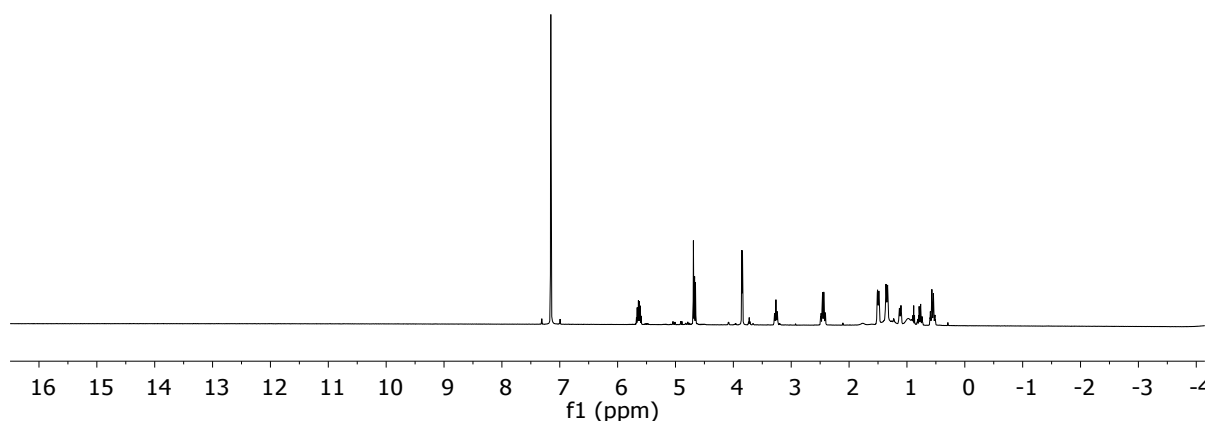

**Figure S26.** <sup>1</sup>H NMR spectrum (C<sub>6</sub>D<sub>6</sub>) of **3b**.

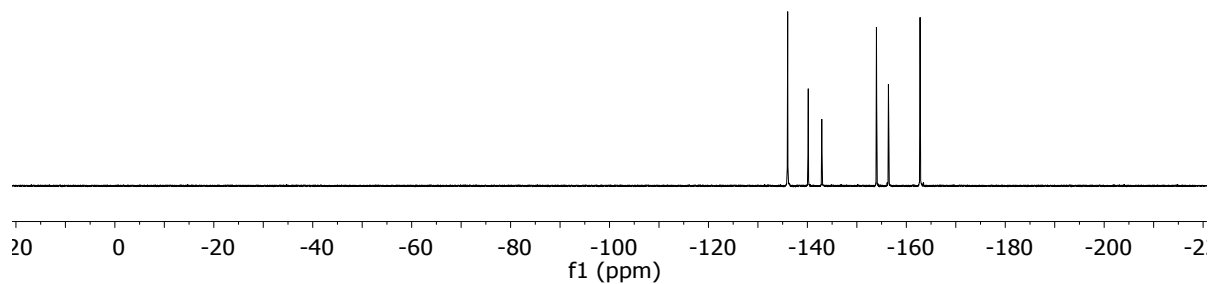

**Figure S27.**  $^{19}\text{F}\{^1\text{H}\}$  NMR spectrum ( $\text{C}_6\text{D}_6$ ) of **3b**.

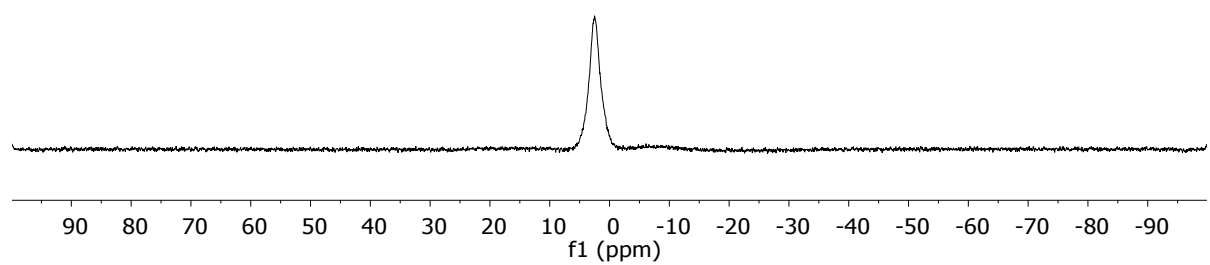

**Figure S28.**  $^{11}\text{B}\{^1\text{H}\}$  NMR spectrum ( $\text{C}_6\text{D}_6$ ) of **3b**.

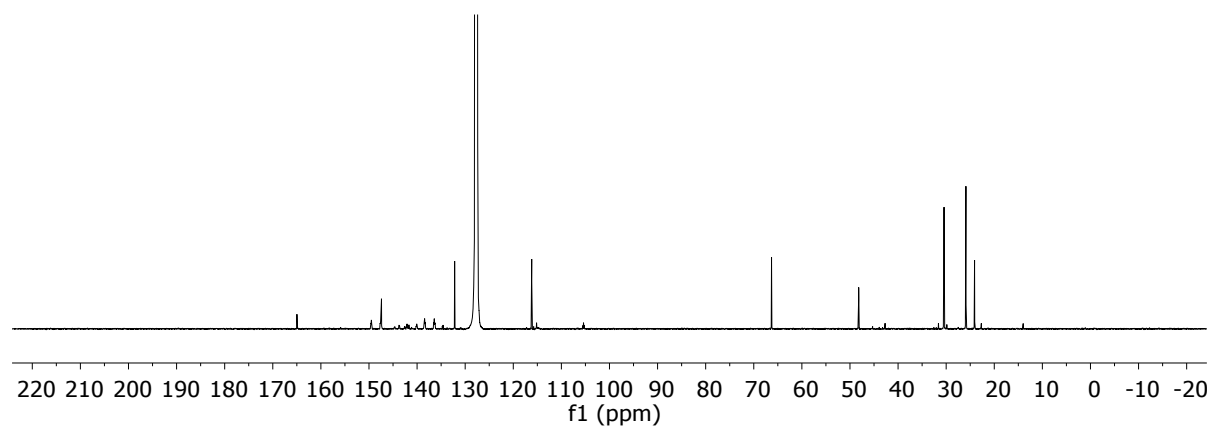

**Figure S29.**  $^{13}\text{C}\{^1\text{H}\}$  NMR spectrum ( $\text{C}_6\text{D}_6$ ) of **3b**.

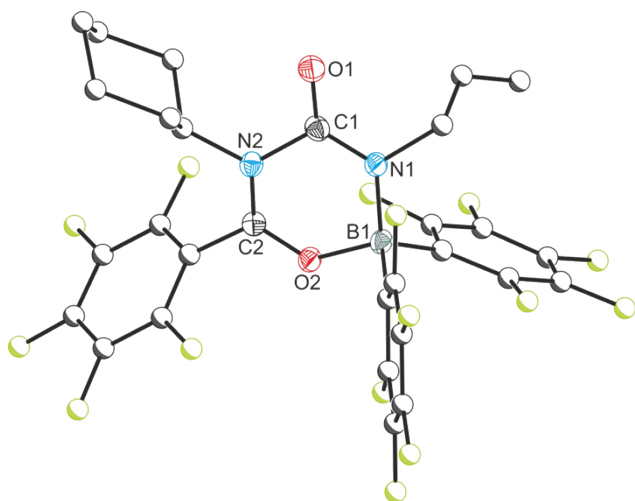

**Figure S30.** Single crystal X-ray structure of **3b**. Atoms of the Cy, allyl and C<sub>6</sub>F<sub>5</sub> moieties are pictured as spheres of arbitrary radius. Anisotropic displacement ellipsoids pictured at 50% probability. Hydrogen atoms omitted for clarity.

## 2.7. Compound 3c

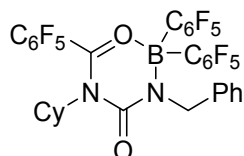

**<sup>1</sup>H NMR (500 MHz, C<sub>6</sub>D<sub>6</sub>):**  $\delta$  = 6.98 (d,  $^3J_{\text{H-H}} = 7.2$  Hz, 2H, *Ph*), 6.94 (t,  $^3J_{\text{H-H}} = 7.6$  Hz, 2H, *Ph*), 6.88 (m, 1H, *Ph*), 4.58 (s, 2H, CH<sub>2</sub>Ph), 3.31 (tt,  $^3J_{\text{H-H}} = 12.0, 3.7$  Hz, 1H, *Cy*), 2.51 (qd,  $^3J_{\text{H-H}} = 12.7, 3.8$  Hz, 2H, *Cy*), 1.56 (m, 1H, *Cy*), 1.38 (dt,  $^3J_{\text{H-H}} = 14.1, 3.3$  Hz, 2H, *Cy*), 1.13 (dd,  $^3J_{\text{H-H}} = 9.7, 6.3$  Hz, 1H, *Cy*), 0.96 (m, 2H, *Cy*), 0.80 (qt,  $^3J_{\text{H-H}} = 13.3, 3.6$  Hz, 1H, *Cy*), 0.58 (qt,  $^3J_{\text{H-H}} = 13.3, 3.6$  Hz, 2H, *Cy*); **<sup>19</sup>F{<sup>1</sup>H} NMR (377 MHz, C<sub>6</sub>D<sub>6</sub>):**  $\delta$  = -136.0 (m, 4F, *o*-C<sub>6</sub>F<sub>5</sub>), -140.2 (d,  $^3J_{\text{F-F}} = 19$  Hz, 2F, *o*-C<sub>6</sub>F<sub>5</sub>), -142.9 (t,  $^3J_{\text{F-F}} = 22$  Hz, 1F, *p*-C<sub>6</sub>F<sub>5</sub>), -154.4 (t,  $^3J_{\text{F-F}} = 21$  Hz, 2F, *p*-C<sub>6</sub>F<sub>5</sub>), -156.4 (m, 2F, *m*-C<sub>6</sub>F<sub>5</sub>), -163.1 (m, 4F, *m*-C<sub>6</sub>F<sub>5</sub>); **<sup>11</sup>B{<sup>1</sup>H} NMR (128 MHz, C<sub>6</sub>D<sub>6</sub>):**  $\delta$  = 2.8 (s); **<sup>13</sup>C{<sup>1</sup>H} NMR (126 MHz, C<sub>6</sub>D<sub>6</sub>):**  $\delta$  = 165.1 (s, NCN), 148.9 (s, *Ph*), 148.4 (bd,  $^1J_{\text{C-F}} = 239$  Hz, C<sub>6</sub>F<sub>5</sub>), 143.6 (bd,  $^1J_{\text{C-F}} = 257$  Hz, C<sub>6</sub>F<sub>5</sub>), 142.7 (bd,  $^1J_{\text{C-F}} = 265$  Hz, C<sub>6</sub>F<sub>5</sub>), 141.0 (bd,  $^1J_{\text{C-F}} = 248$  Hz, C<sub>6</sub>F<sub>5</sub>), 137.4 (bd,  $^1J_{\text{C-F}} = 248$  Hz, C<sub>6</sub>F<sub>5</sub>), 137.3 (s, *Ph*), 127.1 (s, *Ph*), 126.7 (s, *Ph*), 66.5 (s, NCO), 48.8 (s, CH<sub>2</sub>Ph), 30.5 (s, *Cy*), 25.9 (s, *Cy*), 24.1 (s, *Cy*) ppm.

**Isolated Yield** = 70%.

**Elemental analysis** for C<sub>33</sub>H<sub>18</sub>BF<sub>15</sub>N<sub>2</sub>O<sub>2</sub>: calcd.: C 51.46, H 2.36, N 3.64; found: C 51.66, H 2.38, N 3.79.

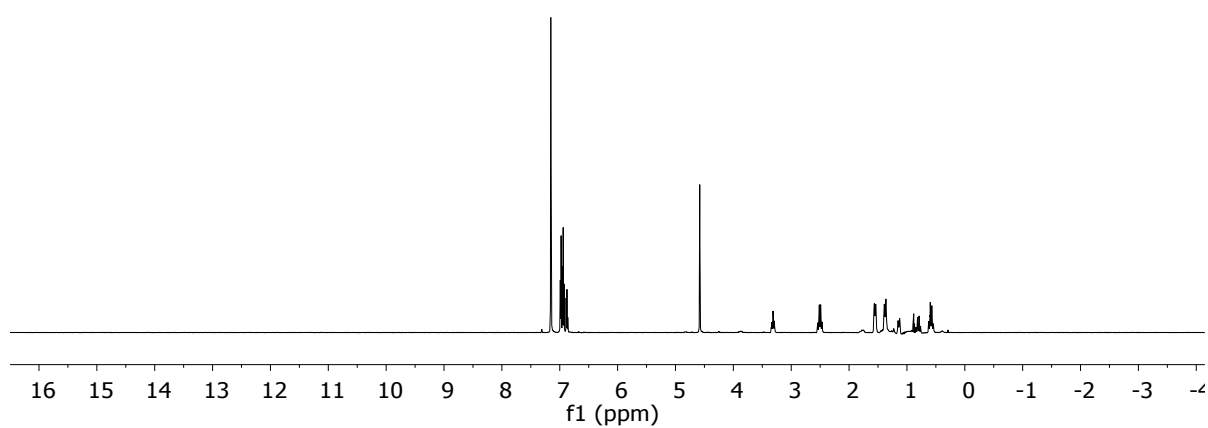

**Figure S31.**  $^1\text{H}$  NMR spectrum ( $\text{C}_6\text{D}_6$ ) of **3c**.

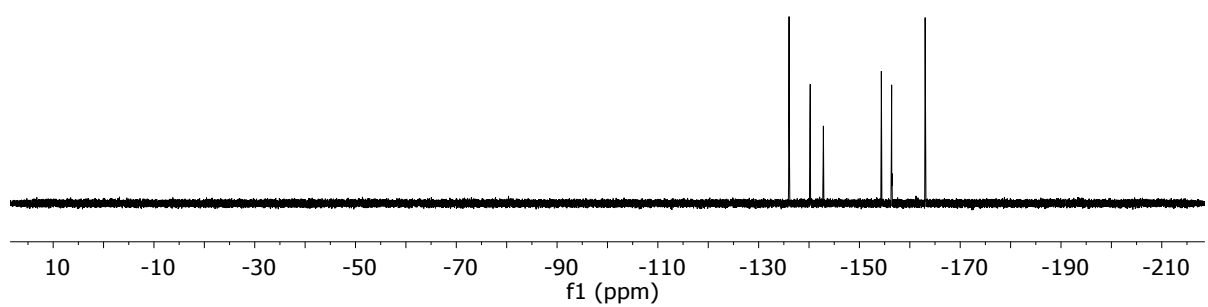

**Figure S32.**  $^{19}\text{F}\{^1\text{H}\}$  NMR spectrum ( $\text{C}_6\text{D}_6$ ) of **3c**.

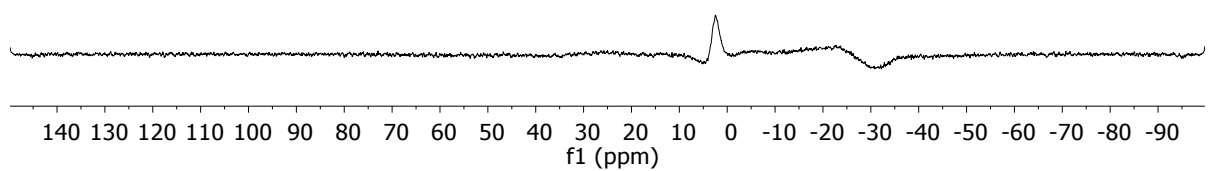

**Figure S33.**  $^{11}\text{B}\{^1\text{H}\}$  NMR spectrum ( $\text{C}_6\text{D}_6$ ) of **3c**.

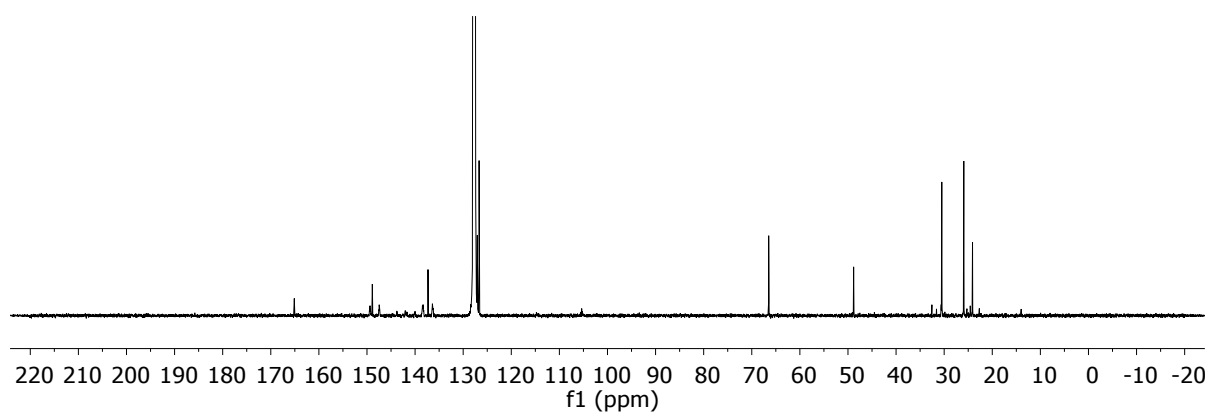

**Figure S34.**  $^{13}\text{C}\{^1\text{H}\}$  NMR spectrum ( $\text{C}_6\text{D}_6$ ) of **3c**.

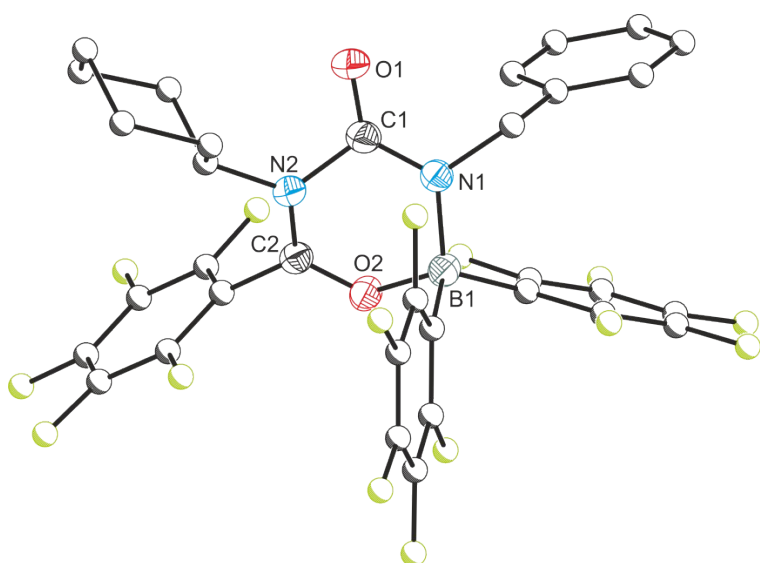

**Figure S35.** Single crystal X-ray structure of **3c**. Atoms of the Cy, benzyl and  $\text{C}_6\text{F}_5$  moieties are pictured as spheres of arbitrary radius. Anisotropic displacement ellipsoids pictured at 50% probability. Hydrogen atoms omitted for clarity.

## 2.8. Compound 3d

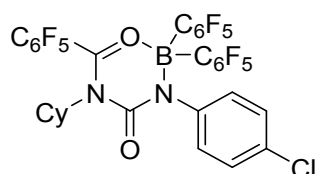

$^1\text{H}$  NMR (500 MHz,  $\text{C}_6\text{D}_6$ ):  $\delta$  = 7.07 (d,  $^3J_{\text{H-H}}$  = 8.8 Hz, 2H,  $\text{C}_6\text{H}_4\text{Cl}$ ), 6.90 (d,  $^3J_{\text{H-H}}$  = 8.8 Hz, 2H,  $\text{C}_6\text{H}_4\text{Cl}$ ), 3.32 (tt,  $^3J_{\text{H-H}}$  = 12.1, 3.7 Hz, 1H, Cy), 2.43 (qd,  $^3J_{\text{H-H}}$  = 12.7, 3.8 Hz, 2H, Cy), 1.62 (d,  $^3J_{\text{H-H}}$  = 11.4 Hz, 2H, Cy), 1.35 (dd,  $^3J_{\text{H-H}}$  = 10.6, 3.2 Hz, 2H, Cy), 1.09 (d,  $^3J_{\text{H-H}}$  = 13.4 Hz, 1H, Cy), 0.93 (m, 1H, Cy), 1.09 (d,  $^3J_{\text{H-H}}$  = 13.4 Hz, 1H, Cy), 0.56 (dddd,  $^3J_{\text{H-H}}$  =

16.8, 13.2, 8.4, 3.5 Hz, 1H, Cy);  $^{19}\text{F}\{^1\text{H}\}$  NMR (377 MHz,  $\text{C}_6\text{D}_6$ ):  $\delta = -135.2$  (d,  $^3J_{\text{F-F}} = 17$  Hz, 4F, *o*- $\text{C}_6\text{F}_5$ ),  $-140.3$  (d,  $^3J_{\text{F-F}} = 19$  Hz, 2F, *o*- $\text{C}_6\text{F}_5$ ),  $-142.3$  (t,  $^3J_{\text{F-F}} = 22$  Hz, 1F, *p*- $\text{C}_6\text{F}_5$ ),  $-152.8$  (t,  $^3J_{\text{F-F}} = 21$  Hz, 2F, *p*- $\text{C}_6\text{F}_5$ ),  $-156.0$  (m, 2F, *m*- $\text{C}_6\text{F}_5$ ),  $-162.4$  (dt,  $^3J_{\text{F-F}} = 21, 17$  Hz, 4F, *m*- $\text{C}_6\text{F}_5$ );  $^{11}\text{B}\{^1\text{H}\}$  NMR (128 MHz,  $\text{C}_6\text{D}_6$ ):  $\delta = 3.2$  (s);  $^{13}\text{C}\{^1\text{H}\}$  NMR (126 MHz,  $\text{C}_6\text{D}_6$ ):  $\delta = 166.0$  (s, NCN), 148.27 (bd,  $^1J_{\text{C-F}} = 240$  Hz,  $\text{C}_6\text{F}_5$ ), 147.8 (s,  $\text{C}_6\text{H}_4\text{Cl}$ ), 142.7 (bd,  $^1J_{\text{C-F}} = 253$  Hz,  $\text{C}_6\text{F}_5$ ), 141.2 (bd,  $^1J_{\text{C-F}} = 248$  Hz,  $\text{C}_6\text{F}_5$ ), 138.3 (s,  $\text{C}_6\text{H}_4\text{Cl}$ ), 137.4 (bd,  $^1J_{\text{C-F}} = 269$  Hz,  $\text{C}_6\text{F}_5$ ), 133.0 (s,  $\text{C}_6\text{H}_4\text{Cl}$ ), 129.0 (s,  $\text{C}_6\text{H}_4\text{Cl}$ ), 66.5 (s, NCO), 30.5 (s, Cy), 25.9 (s, Cy), 24.0 (s, Cy) ppm.

**Isolated Yield** = 60%.

**Elemental analysis** for  $\text{C}_{32}\text{H}_{15}\text{BF}_{15}\text{N}_2\text{O}_2\text{Cl}$ : calcd.: C 48.61, H 1.91, N 3.54; found: C 48.34, H 1.85, N 3.67.

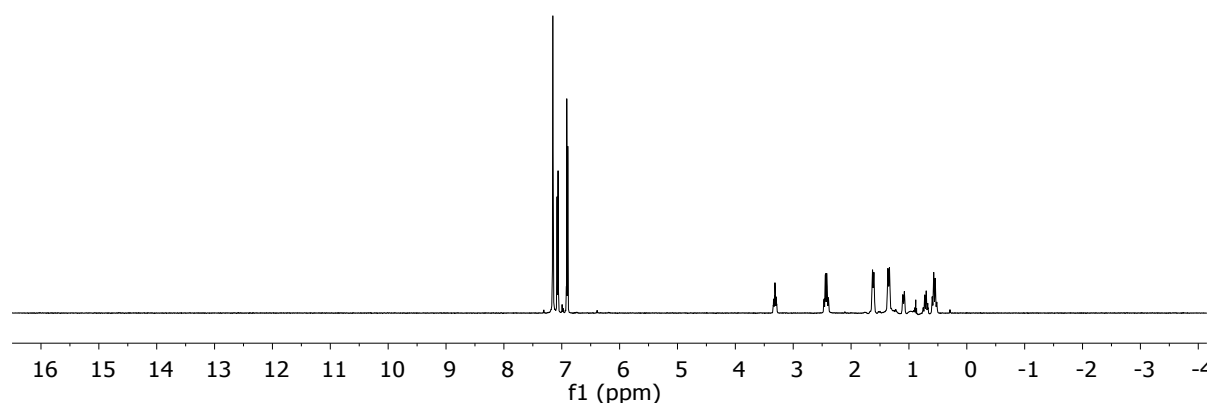

**Figure S36.**  $^1\text{H}$  NMR spectrum ( $\text{C}_6\text{D}_6$ ) of **3d**.

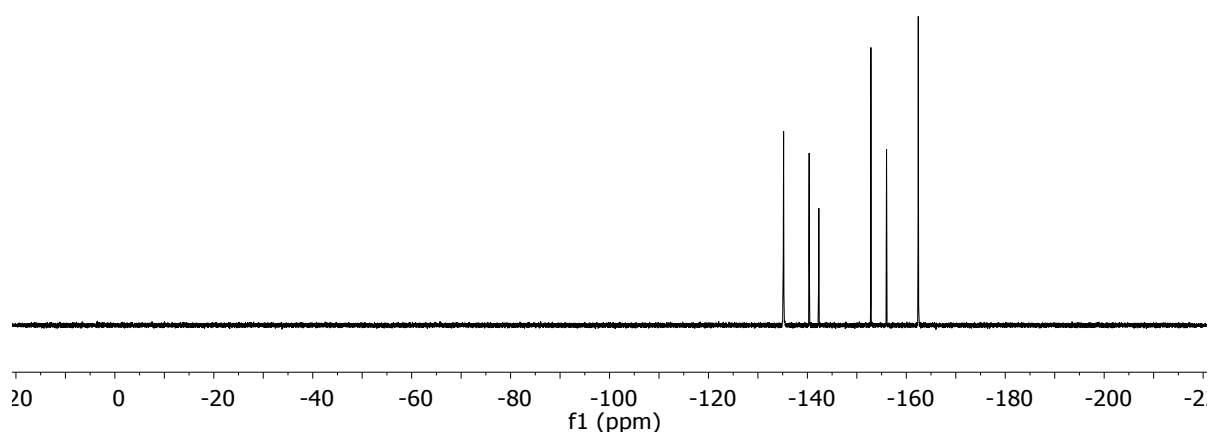

**Figure S37.**  $^{19}\text{F}\{^1\text{H}\}$  NMR spectrum ( $\text{C}_6\text{D}_6$ ) of **3d**.

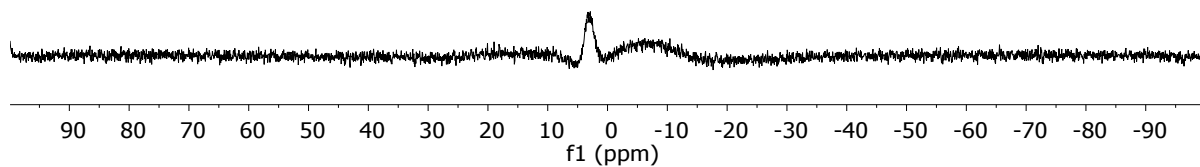

**Figure S38.**  $^{11}\text{B}\{^1\text{H}\}$  NMR spectrum ( $\text{C}_6\text{D}_6$ ) of **3d**.

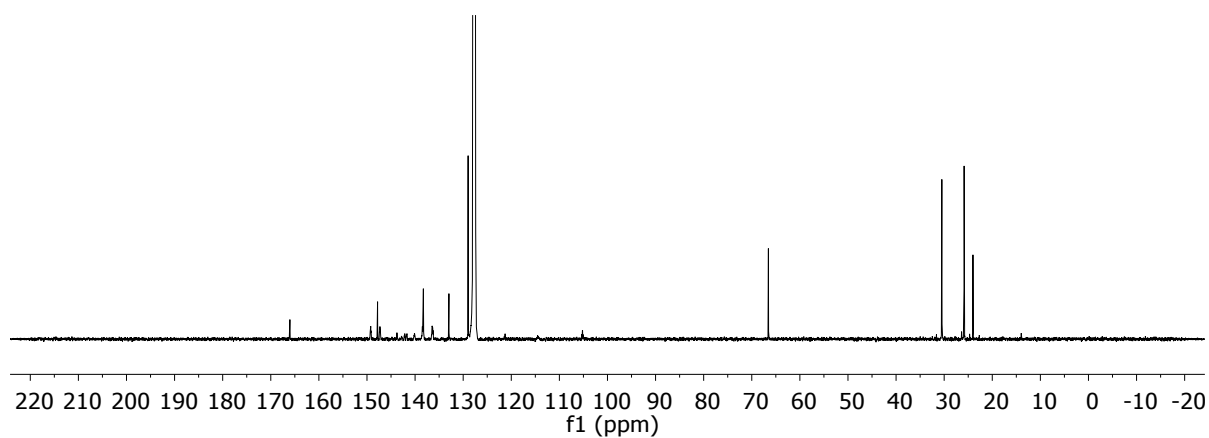

**Figure S39.**  $^{13}\text{C}\{^1\text{H}\}$  NMR spectrum ( $\text{C}_6\text{D}_6$ ) of **3d**.

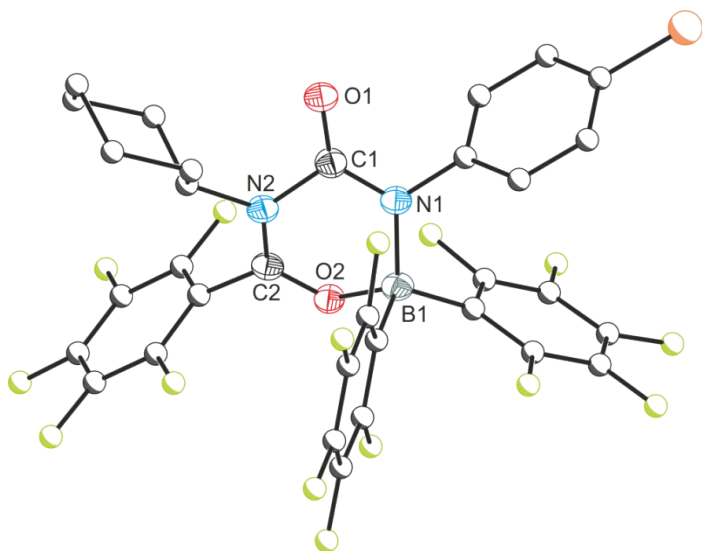

**Figure S40.** Single crystal X-ray structure of **3d**. Atoms of the Cy and aromatic moieties are pictured as spheres of arbitrary radius. Anisotropic displacement ellipsoids pictured at 50% probability. Hydrogen atoms omitted for clarity.

## 2.9. Compound 3e

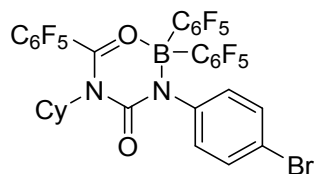

**$^1\text{H}$  NMR (500 MHz,  $\text{C}_6\text{D}_6$ ):**  $\delta$  = 7.07 (d,  $^3J_{\text{H-H}} = 8.8$  Hz, 2H,  $\text{C}_6\text{H}_4\text{Br}$ ), 7.01 (d,  $^3J_{\text{H-H}} = 8.8$  Hz, 2H,  $\text{C}_6\text{H}_4\text{Br}$ ), 3.31 (tt,  $^3J_{\text{H-H}} = 12.3, 6.1$  Hz, 1H, Cy), 2.43 (qd,  $^3J_{\text{H-H}} = 12.8, 3.7$  Hz, 1H, Cy), 1.63 (t,  $^3J_{\text{H-H}} = 16.0$  Hz, 1H, Cy), 1.51 (d,  $^3J_{\text{H-H}} = 13.4$  Hz, 1H, Cy), 1.35 (d,  $^3J_{\text{H-H}} = 13.5$  Hz, 1H, Cy), 1.26 (m, 1H, Cy), 1.09 (d,  $^3J_{\text{H-H}} = 13.5$  Hz, 1H, Cy), 0.93 (m, 2H, Cy), 0.73 (m, 1H, Cy), 0.55 (q,  $^3J_{\text{H-H}} = 13.4$  Hz, 1H, Cy);  **$^{19}\text{F}\{^1\text{H}\}$  NMR (377 MHz,  $\text{C}_6\text{D}_6$ ):**  $\delta$  = -135.2 (d,  $^3J_{\text{F-F}} = 9$  Hz, 4F, *o*- $\text{C}_6\text{F}_5$ ), -140.3 (d,  $^3J_{\text{F-F}} = 21$  Hz, 2F, *o*- $\text{C}_6\text{F}_5$ ), -142.3 (t,  $^3J_{\text{F-F}} = 22$  Hz, 1F, *p*- $\text{C}_6\text{F}_5$ ), -152.8 (t,  $^3J_{\text{F-F}} = 21$  Hz, 2F, *p*- $\text{C}_6\text{F}_5$ ), -156.0 (m, 2F, *m*- $\text{C}_6\text{F}_5$ ), -162.4 (td,  $^3J_{\text{F-F}} = 21, 9$  Hz, 4F, *m*- $\text{C}_6\text{F}_5$ );  **$^{11}\text{B}\{^1\text{H}\}$  NMR (128 MHz,  $\text{C}_6\text{D}_6$ ):**  $\delta$  = 2.8 (s);  **$^{13}\text{C}\{^1\text{H}\}$  NMR (126 MHz,  $\text{C}_6\text{D}_6$ ):**  $\delta$  = 166.0 (s, NCN), 148.2 (bd,  $^1J_{\text{C-F}} = 255$  Hz,  $\text{C}_6\text{F}_5$ ), 147.7 (s,  $\text{C}_6\text{H}_5\text{Br}$ ), 138.8 (s,  $\text{C}_6\text{H}_5\text{Br}$ ), 137.3 (bd,  $^1J_{\text{C-F}} = 252$  Hz,  $\text{C}_6\text{F}_5$ ), 132.0 (s,  $\text{C}_6\text{H}_5\text{Br}$ ), 131.9 (s,  $\text{C}_6\text{H}_5\text{Br}$ ), 121.6 (s,  $\text{C}_6\text{H}_5\text{Br}$ ), 121.0 (s,  $\text{C}_6\text{H}_5\text{Br}$ ), 66.5 (s, NCO), 31.6 (s, Cy), 30.5 (s, Cy), 26.4 (s, Cy), 25.9 (s, Cy), 24.7 (s, Cy), 24.0 (s, Cy) ppm.

**Isolated Yield** = 58%.

**Elemental analysis** for  $\text{C}_{32}\text{H}_{15}\text{BF}_{15}\text{N}_2\text{O}_2\text{Br}$ : calcd.: C 46.02, H 1.81, N 3.35; found: C 46.32, H 1.87, N 3.46.

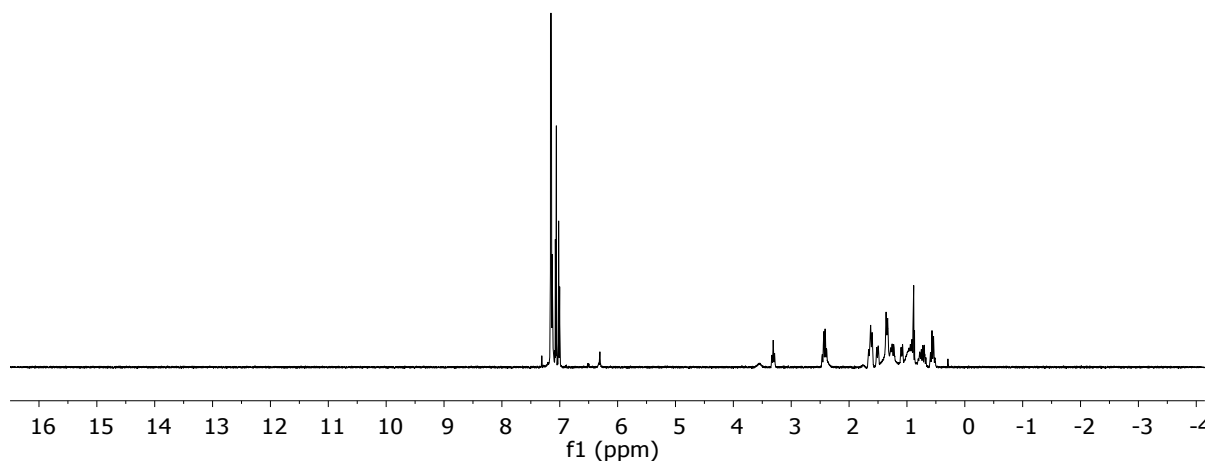

**Figure S41.**  $^1\text{H}$  NMR spectrum ( $\text{C}_6\text{D}_6$ ) of **3e**.





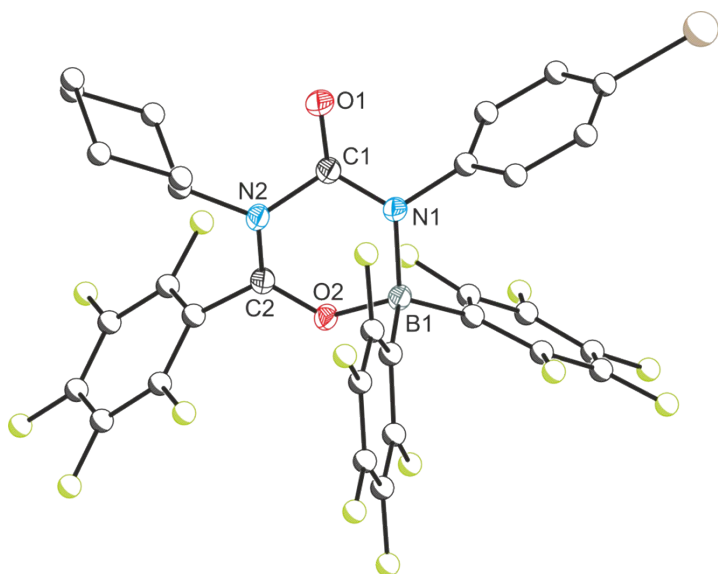

**Figure S45.** Single crystal X-ray structure of **3e**. Atoms of the Cy and aromatic moieties are pictured as spheres of arbitrary radius. Anisotropic displacement ellipsoids pictured at 50% probability. Hydrogen atoms omitted for clarity.

## 2.10. Compound 3f

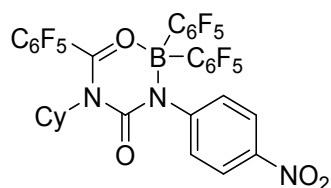

**<sup>1</sup>H NMR (500 MHz, C<sub>6</sub>D<sub>6</sub>):**  $\delta$  = 7.67 (d,  $^3J_{\text{H-H}}$  = 8.9 Hz, 2H, C<sub>6</sub>H<sub>4</sub>NO<sub>2</sub>), 7.07 (d,  $^3J_{\text{H-H}}$  = 8.9 Hz, 2H, C<sub>6</sub>H<sub>4</sub>NO<sub>2</sub>), 3.32 (tt,  $^3J_{\text{H-H}}$  = 12.0, 3.7 Hz, 1H, Cy), 2.40 (qd,  $^3J_{\text{H-H}}$  = 12.6, 3.8 Hz, 2H, Cy), 2.11 (s, 1H, Cy), 1.61 (d,  $^3J_{\text{H-H}}$  = 11.3 Hz, 1H, Cy), 1.36 (m, 2H, Cy), 1.09 (d,  $^3J_{\text{H-H}}$  = 12.5 Hz, 1H, Cy), 0.93 (bm, 2H, Cy), 0.70 (m, 1H, Cy), 0.57 (m, 1H, Cy); **<sup>19</sup>F{<sup>1</sup>H} NMR (377 MHz, C<sub>6</sub>D<sub>6</sub>):**  $\delta$  = -135.3 (d,  $^3J_{\text{F-F}}$  = 24 Hz, 4F, *o*-C<sub>6</sub>F<sub>5</sub>), -140.3 (d,  $^3J_{\text{F-F}}$  = 20 Hz, 2F, *o*-C<sub>6</sub>F<sub>5</sub>), -141.7 (m, 1F, *p*-C<sub>6</sub>F<sub>5</sub>), -152.1 (m, 1F, *p*-C<sub>6</sub>F<sub>5</sub>), -155.7 (m, 2F, *m*-C<sub>6</sub>F<sub>5</sub>), -162.0 (m, 4F, *m*-C<sub>6</sub>F<sub>5</sub>); **<sup>11</sup>B{<sup>1</sup>H} NMR (128 MHz, C<sub>6</sub>D<sub>6</sub>):**  $\delta$  = 2.5 (s); **<sup>13</sup>C{<sup>1</sup>H} NMR (126 MHz, C<sub>6</sub>D<sub>6</sub>):**  $\delta$  = 166.4 (s, NCN), 148.3 (bd,  $^1J_{\text{C-F}}$  = 241 Hz, C<sub>6</sub>F<sub>5</sub>), 147.7 (s, C<sub>6</sub>H<sub>4</sub>NO<sub>2</sub>), 146.2 (s, C<sub>6</sub>H<sub>4</sub>NO<sub>2</sub>), 142.8 (bd,  $^1J_{\text{C-F}}$  = 257 Hz, C<sub>6</sub>F<sub>5</sub>), 141.3 (bd,  $^1J_{\text{C-F}}$  = 256 Hz, C<sub>6</sub>F<sub>5</sub>), 137.4 (bd,  $^1J_{\text{C-F}}$  = 247.9 Hz, C<sub>6</sub>F<sub>5</sub>), 129.0 (s, C<sub>6</sub>H<sub>4</sub>NO<sub>2</sub>), 128.2 (s, C<sub>6</sub>H<sub>4</sub>NO<sub>2</sub>), 126.9 (s, C<sub>6</sub>H<sub>4</sub>NO<sub>2</sub>), 125.3 (s, C<sub>6</sub>H<sub>4</sub>NO<sub>2</sub>), 124.0 (s, C<sub>6</sub>H<sub>4</sub>NO<sub>2</sub>), 66.8 (s, NCO), 30.5 (s, Cy), 25.8 (s, Cy), 24.0 (s, Cy), 21.1 (s, Cy) ppm.

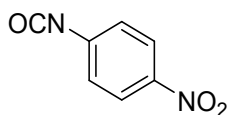

**<sup>1</sup>H NMR (500 MHz, C<sub>6</sub>D<sub>6</sub>):** δ = 7.53 (d, <sup>3</sup>J<sub>H-H</sub> = 9.0 Hz, 2H, C<sub>6</sub>H<sub>4</sub>NO<sub>2</sub>), 6.06 (d, <sup>3</sup>J<sub>H-H</sub> = 9.0 Hz, 2H, C<sub>6</sub>H<sub>4</sub>NO<sub>2</sub>); **<sup>13</sup>C{<sup>1</sup>H} NMR (126 MHz, C<sub>6</sub>D<sub>6</sub>):** δ = 144.9 (s, C<sub>6</sub>H<sub>4</sub>NO<sub>2</sub>), 138.8 (s, C<sub>6</sub>H<sub>4</sub>NO<sub>2</sub>), 124.7 (s, C<sub>6</sub>H<sub>4</sub>NO<sub>2</sub>), 124.5 (s, C<sub>6</sub>H<sub>4</sub>NO<sub>2</sub>) ppm.

**Isolated Yield** = 68%.

**Elemental analysis** for C<sub>32</sub>H<sub>15</sub>BF<sub>15</sub>N<sub>3</sub>O<sub>4</sub>+1/2C<sub>7</sub>H<sub>4</sub>N<sub>2</sub>O<sub>3</sub>+1/2tol: calcd.: C 50.40, H 2.28, N 6.03; found: C 50.29, H 2.41, N 6.92.

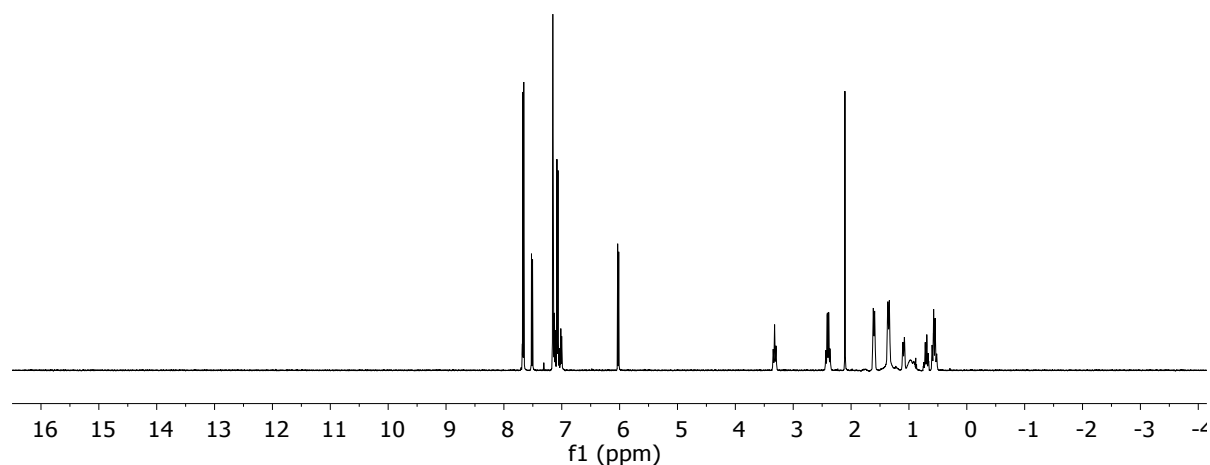

**Figure S46.** <sup>1</sup>H NMR spectrum (C<sub>6</sub>D<sub>6</sub>) of 3f.

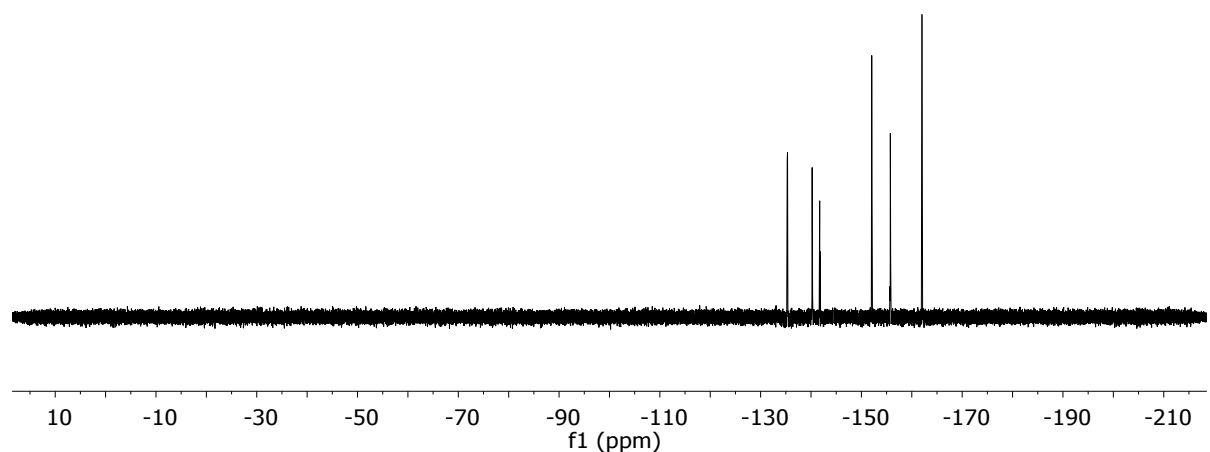

**Figure S47.** <sup>19</sup>F{<sup>1</sup>H} NMR spectrum (C<sub>6</sub>D<sub>6</sub>) of 3f.

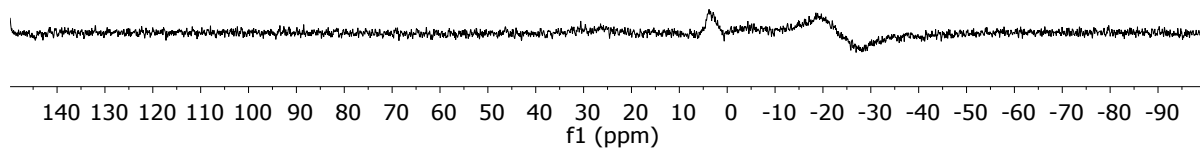

**Figure S48.**  $^{11}\text{B}\{^1\text{H}\}$  NMR spectrum ( $\text{C}_6\text{D}_6$ ) of **3f**.

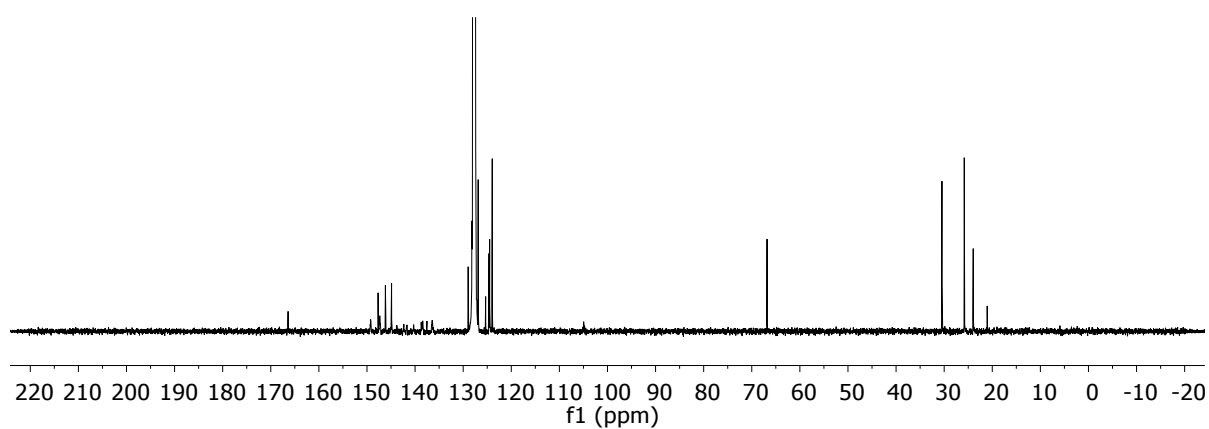

**Figure S49.**  $^{13}\text{C}\{^1\text{H}\}$  NMR spectrum ( $\text{C}_6\text{D}_6$ ) of **3f**.

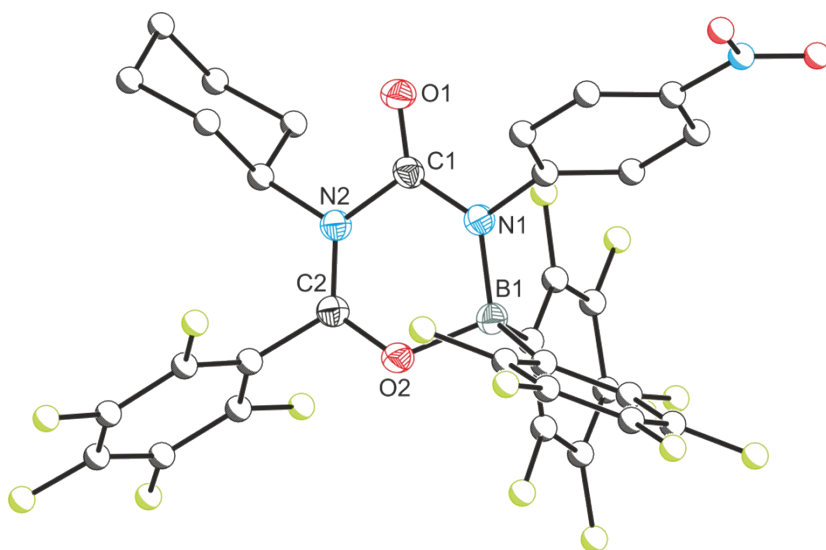

**Figure S50.** Single crystal X-ray structure of **3f**. Atoms of the Cy and aromatic moieties are pictured as spheres of arbitrary radius. Anisotropic displacement ellipsoids pictured at 50% probability. Hydrogen atoms omitted for clarity.

## 2.11. Compound 3g

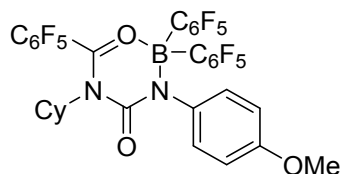

**$^1\text{H}$  NMR (500 MHz,  $\text{C}_6\text{D}_6$ ):**  $\delta$  = 7.25 (d,  $^3J_{\text{H-H}} = 9.0$  Hz, 2H,  $\text{C}_6\text{H}_4\text{OMe}$ ), 6.55 (d,  $^3J_{\text{H-H}} = 9.0$  Hz, 2H,  $\text{C}_6\text{H}_4\text{OMe}$ ), 3.36 (tt,  $^3J_{\text{H-H}} = 12.0, 3.6$  Hz, 1H, Cy), 3.04 (s, 3H,  $\text{C}_6\text{H}_4\text{OMe}$ ), 2.48 (qd,  $^3J_{\text{H-H}} = 12.6, 3.8$  Hz, 2H, Cy), 1.65 (m, 2H, Cy), 1.37 (m, 2H, Cy), 1.10 (m, 1H, Cy), 0.73 (qt,  $^3J_{\text{H-H}} = 13.1, 3.5$  Hz, 1H, Cy), 0.59 (qt,  $^3J_{\text{H-H}} = 13.2, 3.5$  Hz, 2H, Cy);  **$^{19}\text{F}\{^1\text{H}\}$  NMR (377 MHz,  $\text{C}_6\text{D}_6$ ):**  $\delta$  = -135.0 (d,  $^3J_{\text{F-F}} = 26$  Hz, 4F, *o*- $\text{C}_6\text{F}_5$ ), -140.3 (d,  $^3J_{\text{F-F}} = 21$  Hz, 2F, *o*- $\text{C}_6\text{F}_5$ ), -142.9 (m, 1F, *p*- $\text{C}_6\text{F}_5$ ), -153.7 (t,  $^3J_{\text{F-F}} = 21$  Hz, 2F, *p*- $\text{C}_6\text{F}_5$ ), -156.3 (m, 2F, *m*- $\text{C}_6\text{F}_5$ ), -162.9 (td,  $^3J_{\text{F-F}} = 26, 23$ , 4F, *m*- $\text{C}_6\text{F}_5$ );  **$^{11}\text{B}\{^1\text{H}\}$  NMR (128 MHz,  $\text{C}_6\text{D}_6$ ):**  $\delta$  = 3.3 (s);  **$^{13}\text{C}\{^1\text{H}\}$  NMR (126 MHz,  $\text{C}_6\text{D}_6$ ):**  $\delta$  = 165.8 (s, NCN), 158.6 (s,  $\text{C}_6\text{H}_4\text{OMe}$ ), 148.4 (bd,  $^1J_{\text{C-F}} = 246$  Hz,  $\text{C}_6\text{F}_5$ ), 148.1 (s,  $\text{C}_6\text{H}_4\text{OMe}$ ), 143.7 (bd,  $^1J_{\text{C-F}} = 263$  Hz,  $\text{C}_6\text{F}_5$ ), 142.8 (bd,  $^1J_{\text{C-F}} = 261$  Hz,  $\text{C}_6\text{F}_5$ ), 141.0 (bd,  $^1J_{\text{C-F}} = 253$  Hz,  $\text{C}_6\text{F}_5$ ), 137.5 (bd,  $^1J_{\text{C-F}} = 255$  Hz,  $\text{C}_6\text{F}_5$ ), 132.5 (s,  $\text{C}_6\text{H}_4\text{OMe}$ ), 125.4 (s,  $\text{C}_6\text{H}_4\text{OMe}$ ), 114.5 (s,  $\text{C}_6\text{H}_4\text{OMe}$ ), 114.0 (s,  $\text{C}_6\text{H}_4\text{OMe}$ ), 66.4 (s, NCO), 54.3 (s,  $\text{C}_6\text{H}_4\text{OMe}$ ), 30.5 (s, Cy), 25.9 (s, Cy), 24.1 (s, Cy) ppm.

**Isolated Yield** = 66%.

**Elemental analysis** for  $\text{C}_{33}\text{H}_{18}\text{BF}_{15}\text{N}_2\text{O}_3$ : calcd.: C 50.41, H 2.31, N 3.56; found: C 51.22, H 2.33, N 3.98.

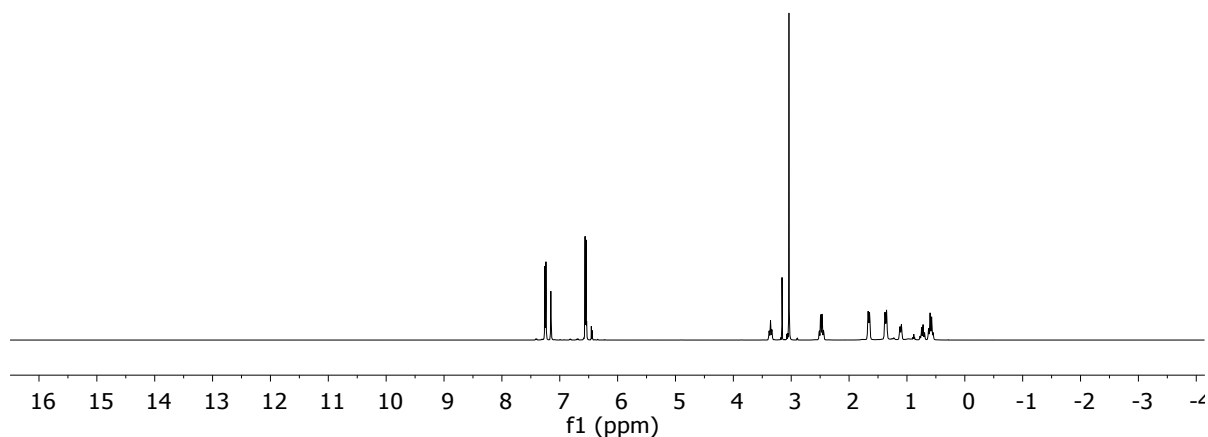

**Figure S51.**  $^{13}\text{C}\{^1\text{H}\}$  NMR spectrum ( $\text{C}_6\text{D}_6$ ) of **3g**.

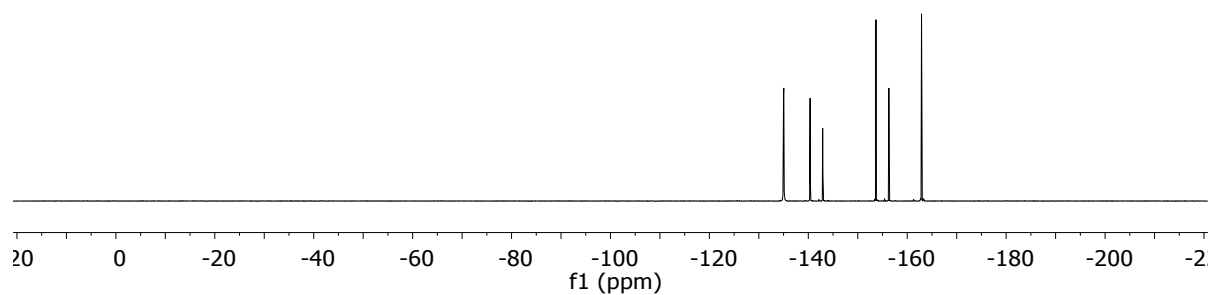

**Figure S52.**  $^{19}\text{F}\{^1\text{H}\}$  NMR spectrum ( $\text{C}_6\text{D}_6$ ) of **3g**.

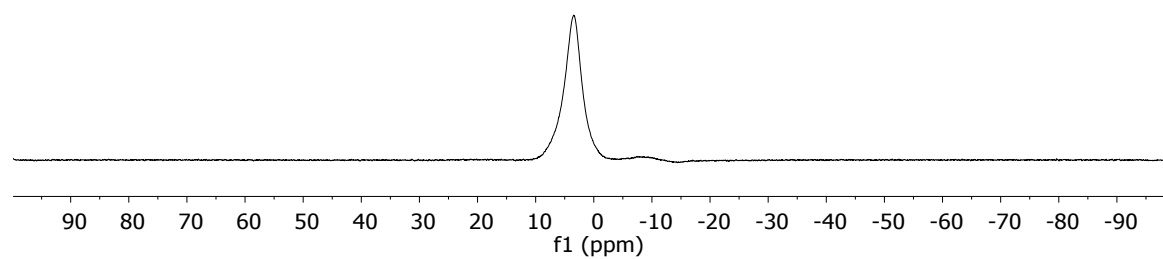

**Figure S53.**  $^{11}\text{B}\{^1\text{H}\}$  NMR spectrum ( $\text{C}_6\text{D}_6$ ) of **3g**.

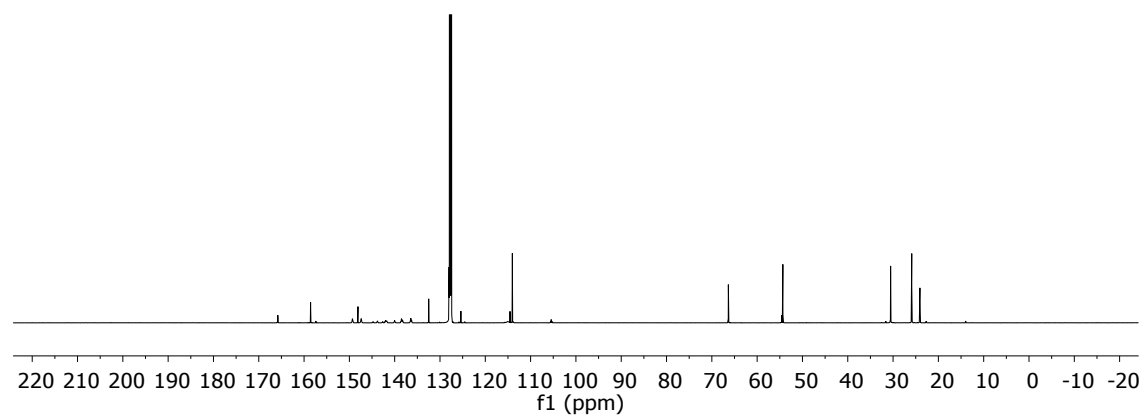

**Figure S54.**  $^{13}\text{C}\{^1\text{H}\}$  NMR spectrum ( $\text{C}_6\text{D}_6$ ) of **3g**.

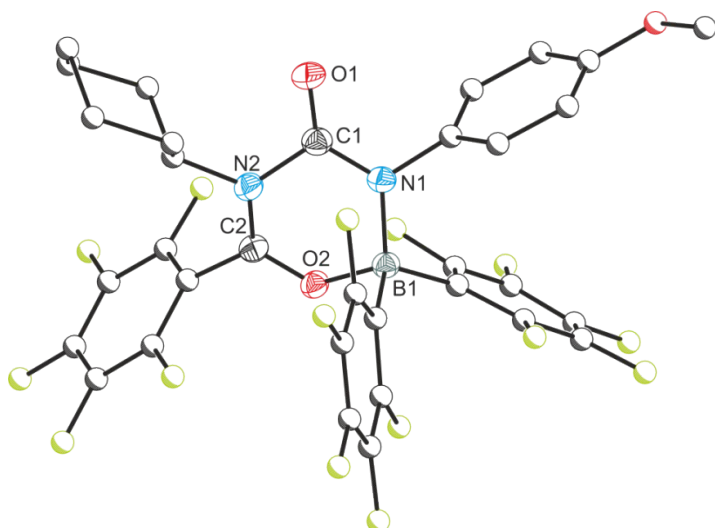

**Figure S55.** Single crystal X-ray structure of **3g**. Atoms of the Cy and aromatic moieties are pictured as spheres of arbitrary radius. Anisotropic displacement ellipsoids pictured at 50% probability. Hydrogen atoms omitted for clarity.

## 2.12. Compound 3h

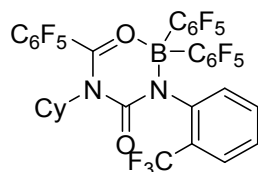

**$^1\text{H}$  NMR (500 MHz,  $\text{C}_6\text{D}_6$ ):**  $\delta$  = 7.64 (d,  $^3J_{\text{H-H}}$  = 8.1 Hz, 1H,  $\text{C}_6\text{H}_4\text{CF}_3$ ), 7.20 (d,  $^3J_{\text{H-H}}$  = 7.9 Hz, 1H,  $\text{C}_6\text{H}_4\text{CF}_3$ ), 6.93 (t,  $^3J_{\text{H-H}}$  = 7.8 Hz, 1H,  $\text{C}_6\text{H}_4\text{CF}_3$ ), 6.62 (t,  $^3J_{\text{H-H}}$  = 7.7 Hz, 1H,  $\text{C}_6\text{H}_4\text{CF}_3$ ), 3.32 (tt,  $^3J_{\text{H-H}}$  = 12.1, 3.7 Hz, 1H, Cy), 2.51 (qd,  $^3J_{\text{H-H}}$  = 12.9, 3.9 Hz, 1H, Cy), 2.33 (qd,  $^3J_{\text{H-H}}$  = 12.3, 3.9 Hz, 1H, Cy), 1.65 (d,  $^3J_{\text{H-H}}$  = 13.1 Hz, 1H, Cy), 1.51 (d,  $^3J_{\text{H-H}}$  = 12.3 Hz, 1H, Cy), 1.31 (m, 2H, Cy), 0.96 (m, 2H, Cy), 0.64 (m, 1H, Cy), 0.46 (m, 1H, Cy);  **$^{19}\text{F}\{^1\text{H}\}$  NMR (377 MHz,  $\text{C}_6\text{D}_6$ ):**  $\delta$  = -59.8 (m, 3F,  $\text{CF}_3$ ), -137.8 (d,  $^3J_{\text{F-F}}$  = 23 Hz, 2F, *o*- $\text{C}_6\text{F}_5$ ), -142.6 (m, 3F, *o*- $\text{C}_6\text{F}_5$ ), -153.0 (t,  $^3J_{\text{F-F}}$  = 21 Hz, 1F, *o*- $\text{C}_6\text{F}_5$ ), -153.3 (t,  $^3J_{\text{F-F}}$  = 21 Hz, 1F, *p*- $\text{C}_6\text{F}_5$ ), -155.9 (m, 1F, *p*- $\text{C}_6\text{F}_5$ ), -156.4 (m, 1F, *p*- $\text{C}_6\text{F}_5$ ), -162.1 (m, 4F, *m*- $\text{C}_6\text{F}_5$ ), -163.3 (b, 2F, *m*- $\text{C}_6\text{F}_5$ );  **$^{11}\text{B}\{^1\text{H}\}$  NMR (128 MHz,  $\text{C}_6\text{D}_6$ ):**  $\delta$  = 3.4 (s);  **$^{13}\text{C}\{^1\text{H}\}$  NMR (126 MHz,  $\text{C}_6\text{D}_6$ ):**  $\delta$  = 166.8 (s, NCN), 148.9 (s,  $\text{C}_6\text{H}_4\text{CF}_3$ ), 137.1 (s,  $\text{C}_6\text{H}_4\text{CF}_3$ ), 132.3 (s,  $\text{C}_6\text{H}_4\text{CF}_3$ ), 129.3 (s,  $\text{C}_6\text{H}_4\text{CF}_3$ ), 127.2 (s,  $\text{C}_6\text{H}_4\text{CF}_3$ ), 66.4 (s, NCO), 30.4 (s, Cy), 29.9 (s, Cy), 25.9 (s, Cy), 25.7 (s, Cy), 24.0 (s, Cy) ppm.  $\text{C}_6\text{H}_4\text{CF}_3$  could not be observed by  $^{13}\text{C}$  NMR spectroscopy.

**Isolated Yield** = 29%

**Elemental analysis** for  $C_{33}H_{15}BF_{18}N_2O_2$ : calcd.: C 48.02, H 1.83, N 3.40; found: C 48.98, H 1.97, N 3.93.

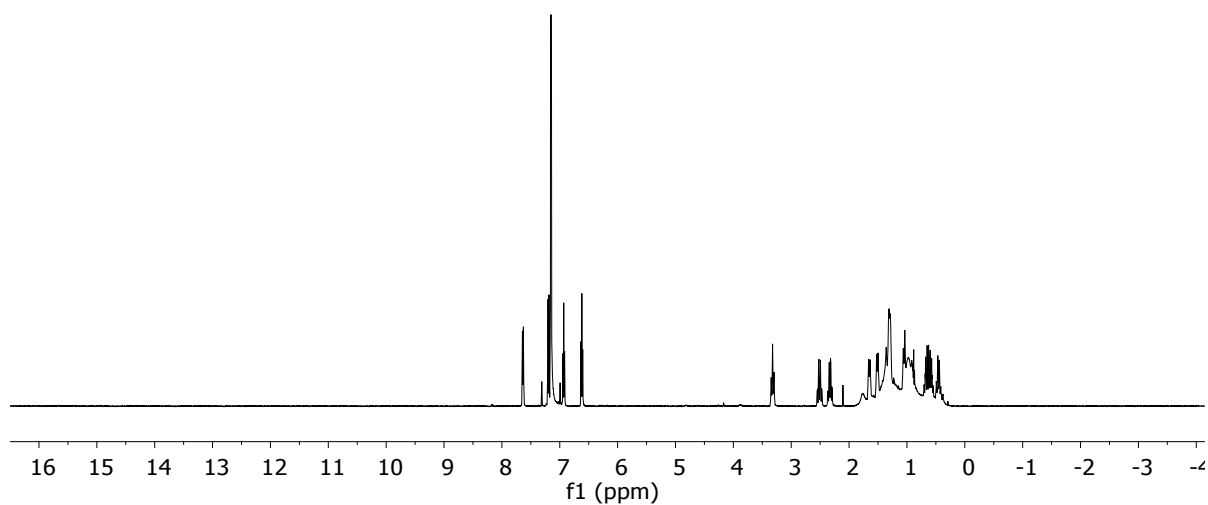

**Figure S56.**  $^1H$  NMR spectrum ( $C_6D_6$ ) of **3h**.

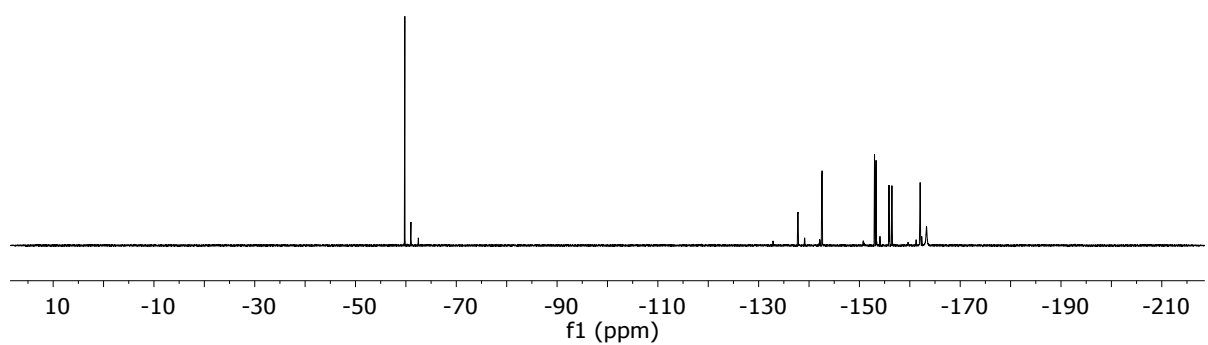

**Figure S57.**  $^{19}F\{^1H\}$  NMR spectrum ( $C_6D_6$ ) of **3h**.

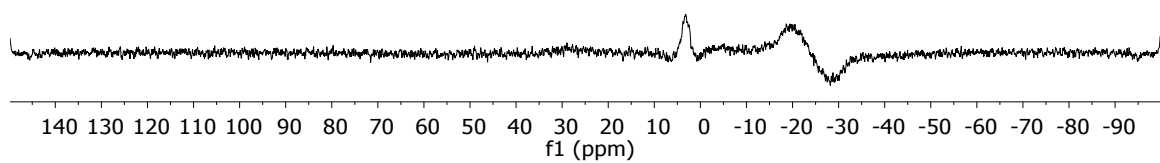

**Figure S58.**  $^{11}B\{^1H\}$  NMR spectrum ( $C_6D_6$ ) of **3h**.



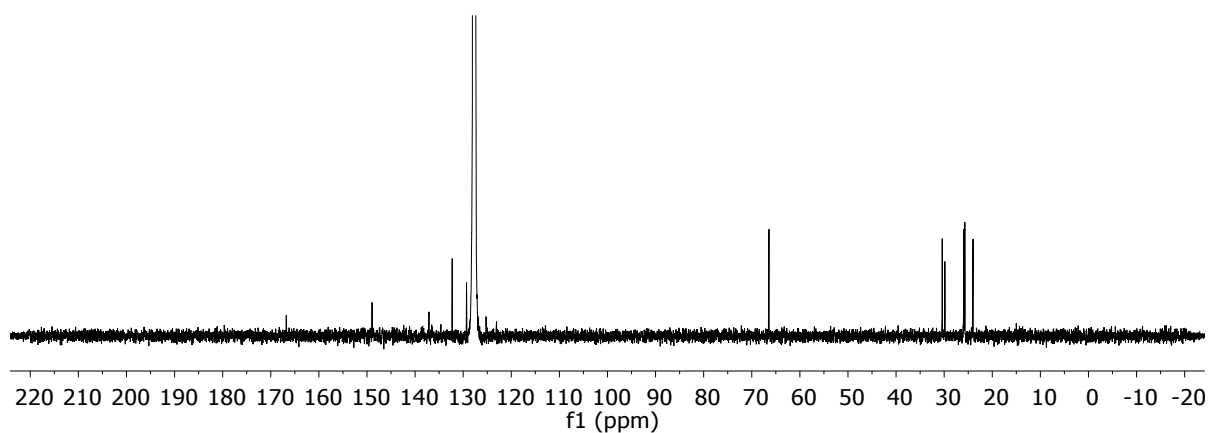

**Figure S59.**  $^{13}\text{C}\{^1\text{H}\}$  NMR spectrum ( $\text{C}_6\text{D}_6$ ) of **3h**.

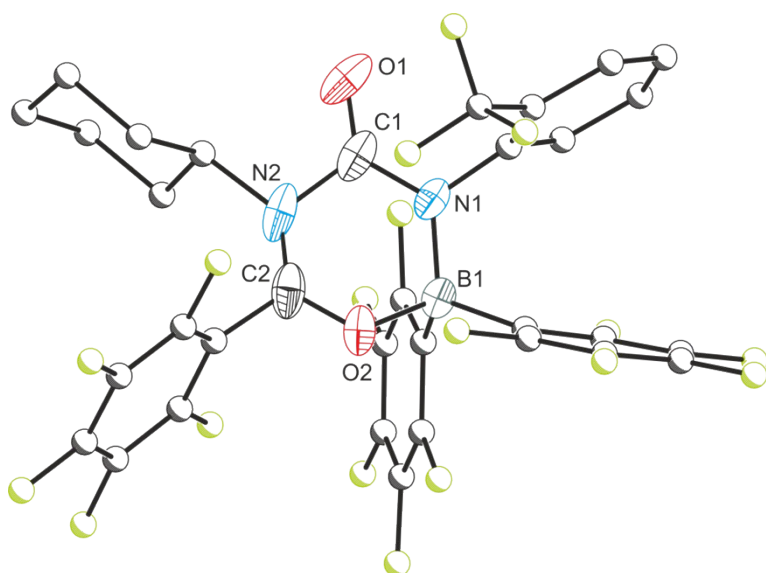

**Figure S60.** Single crystal X-ray structure of **3h**. Atoms of the Cy and aromatic moieties are pictured as spheres of arbitrary radius. Anisotropic displacement ellipsoids pictured at 50% probability. Hydrogen atoms omitted for clarity.

### 2.13. Compound 4

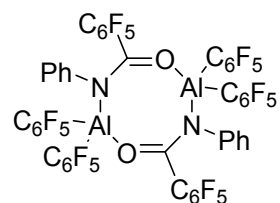

In a Schlenk flask charged with a stir bar  $\text{Al}(\text{C}_6\text{F}_5)_3$  (0.10 g, 0.5 mmol) was dissolved in 5 mL of toluene. To this mixture PhNCO (0.25 g, 2.1 mmol, 4.2 eq) was added dropwise and

S.I.33

stirred overnight. The solvent was removed under reduced pressure to give a pale-yellow oil, which was further washed with hexane ( $3 \times 7$  mL) to yield a white precipitate. Crystals suitable for X-ray diffraction studies could be obtained from the hexane filtrate.

$^{19}\text{F}\{^1\text{H}\}$  NMR (377 MHz,  $\text{C}_6\text{D}_6$ ):  $\delta = -132.6$  (bm, 2F, *o*- $\text{C}_6\text{F}_5$ ),  $-133.1$  (bm, 4F, *o*- $\text{C}_6\text{F}_5$ ),  $-135.2$  (b, 1F, *p*- $\text{C}_6\text{F}_5$ ),  $-163.7$  (t,  $J = 21$  Hz, 2F, *p*- $\text{C}_6\text{F}_5$ ),  $-167.7$  (bm, 4F, *m*- $\text{C}_6\text{F}_5$ ),  $-167.8$  (bm, 2F, *m*- $\text{C}_6\text{F}_5$ ) ppm.

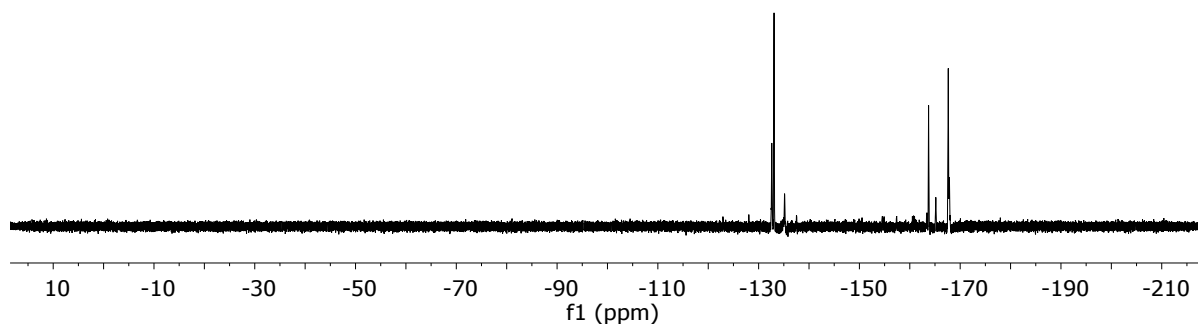

**Figure S61.**  $^{19}\text{F}\{^1\text{H}\}$  NMR spectrum ( $\text{C}_6\text{D}_6$ ) of **4**.

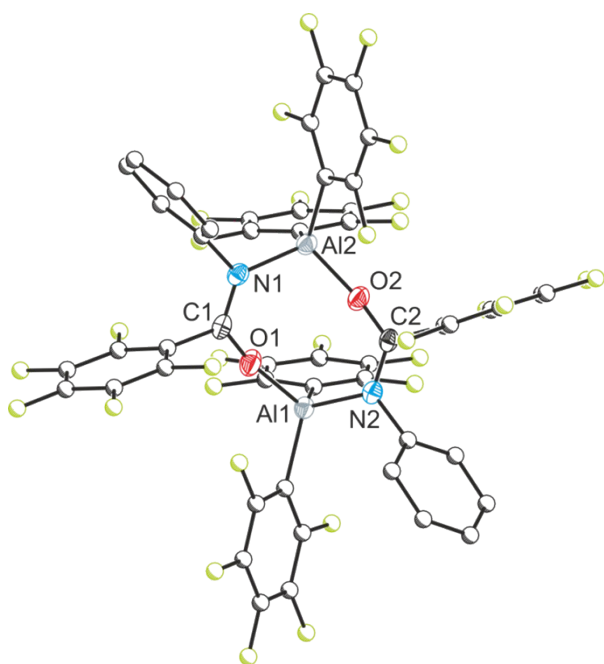

**Figure S62.** Single crystal X-ray structure of **4**. Atoms of the Ph and  $\text{C}_6\text{F}_5$  moieties are pictured as spheres of arbitrary radius. Anisotropic displacement ellipsoids pictured at 50% probability. Hydrogen atoms omitted for clarity.

## 2.14. Compound 5

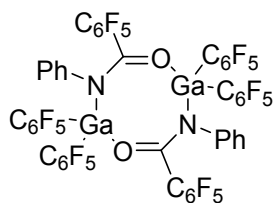

In a Schlenk flask charged with a stir bar  $\text{Ga}(\text{C}_6\text{F}_5)_3$  (0.10 g, 0.4 mmol) was dissolved in 5 mL of toluene. To this mixture PhNCO (0.25 g, 5.2 mmol, 4.2 eq) was added dropwise and stirred overnight. The solvent was removed under reduced pressure to give a pale-yellow oil, which was further washed with hexane ( $3 \times 7$  mL) to yield a white precipitate. Crystals suitable for X-ray diffraction studies could be obtained from the hexane filtrate.

*Note:* NMR spectroscopy could only be performed on a sample contaminated with solvent. Solvent-free samples displayed poor solubility in  $d_8$ -toluene,  $\text{C}_6\text{D}_6$ ,  $\text{CD}_2\text{Cl}_2$ , and  $d_8$ -THF.

**$^1\text{H}$  NMR (500 MHz,  $\text{C}_6\text{D}_6$ ):**  $\delta = 6.91$  (d,  $^3J_{\text{H-H}} = 7.4$  Hz, 4H, *Ph*), 6.57 (m, 6H, *Ph*);  **$^{19}\text{F}\{^1\text{H}\}$  NMR (377 MHz,  $\text{C}_6\text{D}_6$ ):**  $\delta = -124.6$  (d,  $^3J_{\text{F-F}} = 25$  Hz, 4F, *o*- $\text{C}_6\text{F}_5$ ),  $-137.2$  (m, 2F, *o*- $\text{C}_6\text{F}_5$ ),  $-146.6$  (t,  $^3J_{\text{F-F}} = 21$  Hz, 1F, *p*- $\text{C}_6\text{F}_5$ ),  $-149.4$  (t,  $^3J_{\text{F-F}} = 20$  Hz, 2F, *p*- $\text{C}_6\text{F}_5$ ),  $-159.3$  (m, 2F, *m*- $\text{C}_6\text{F}_5$ ),  $-159.9$  (m, 4F, *p*- $\text{C}_6\text{F}_5$ ),  **$^{13}\text{C}\{^1\text{H}\}$  NMR (126 MHz,  $\text{C}_6\text{D}_6$ ):**  $\delta = 167.7$  (s, NCO), 148.8 (bd,  $^1J_{\text{C-F}} = 231$  Hz,  $\text{C}_6\text{F}_5$ ), 142.4 (bd,  $^1J_{\text{C-F}} = 288$  Hz,  $\text{C}_6\text{F}_5$ ), 138.7 (s, *Ph*), 137.1 (bd,  $^1J_{\text{C-F}} = 270$  Hz,  $\text{C}_6\text{F}_5$ ), 129.3 (s, *Ph*), 128.9 (s, *Ph*), 125.3 (s, *Ph*), 124.5 (s, *Ph*) ppm.

**Isolated Yield** = 33%.

**Elemental analysis** for  $\text{C}_{32}\text{H}_{22}\text{BF}_{15}\text{N}_2\text{O}_2$ : calcd.: C 43.5, H 0.7, N 2.0; found: C 40.92, H 0.71, N 2.61.

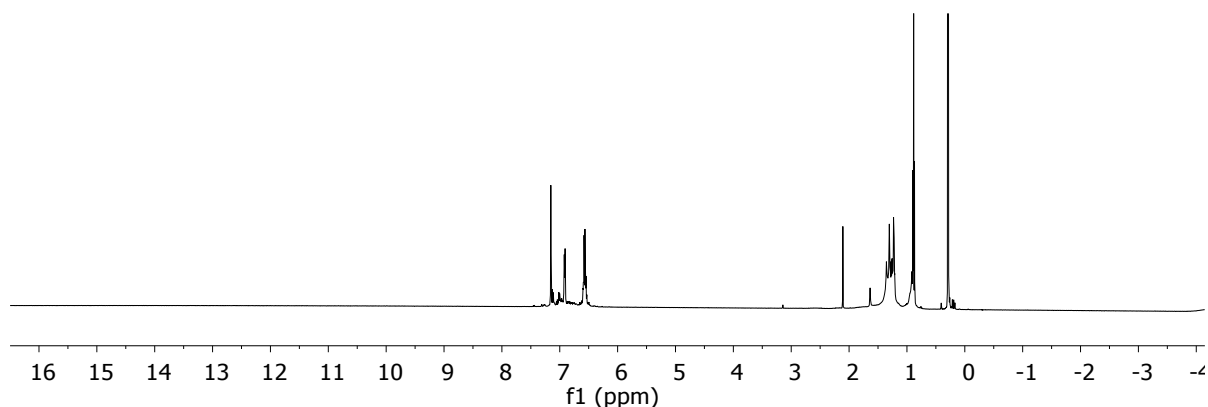

**Figure S63.**  $^1\text{H}$  NMR spectrum ( $\text{C}_6\text{D}_6$ ) of **5**.

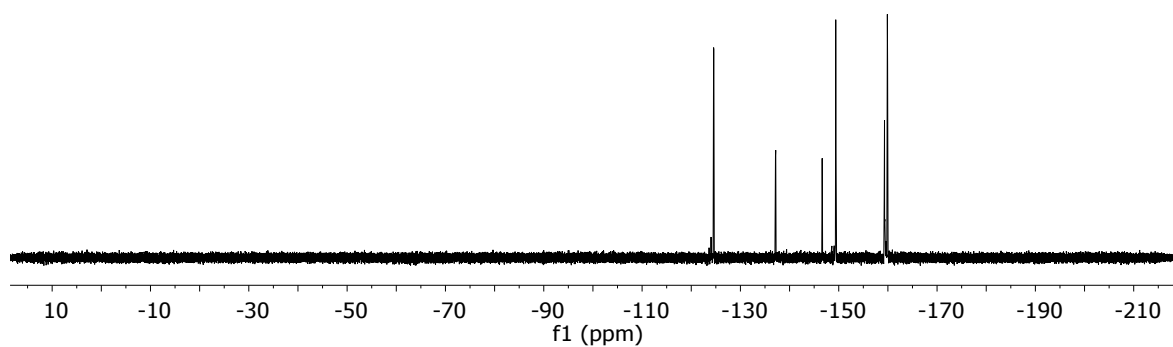

**Figure S64.**  $^{19}\text{F}\{^1\text{H}\}$  NMR spectrum ( $\text{C}_6\text{D}_6$ ) of **5**.

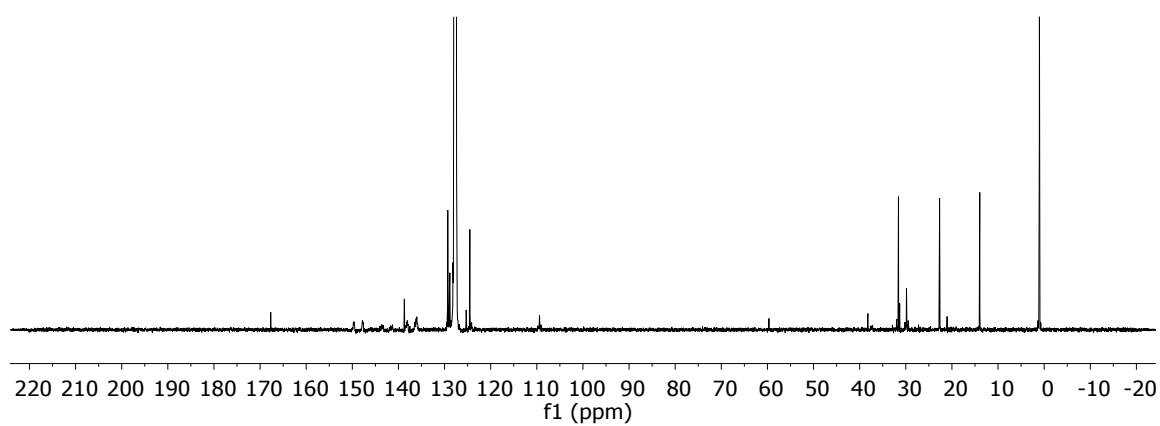

**Figure S65.**  $^{13}\text{C}\{^1\text{H}\}$  NMR spectrum ( $\text{C}_6\text{D}_6$ ) of **5**.

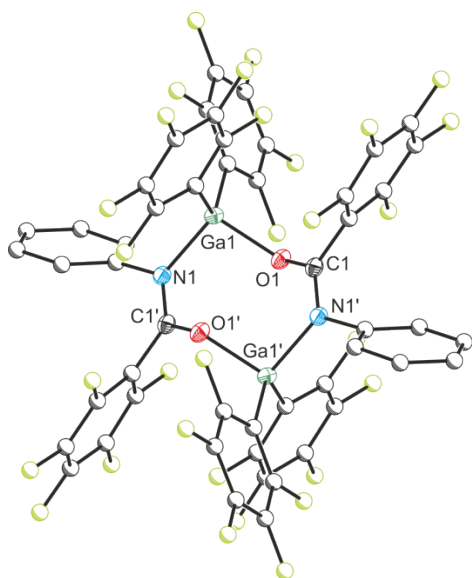

**Figure S66.** Single crystal X-ray structure of **5**. Atoms of the Ph and C<sub>6</sub>F<sub>5</sub> moieties are pictured as spheres of arbitrary radius. Anisotropic displacement ellipsoids pictured at 50% probability. Hydrogen atoms omitted for clarity.

### 3. Kinetic Studies

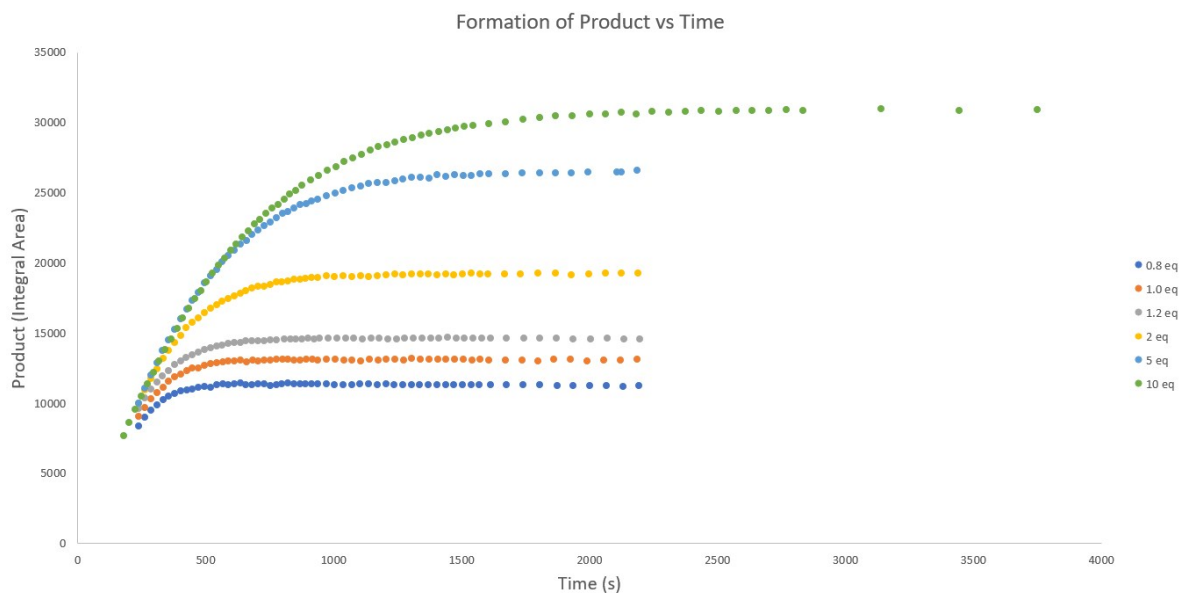

**Figure S68.** Formation of **2** vs. time (s). Experimental conditions as described in section 1.3.

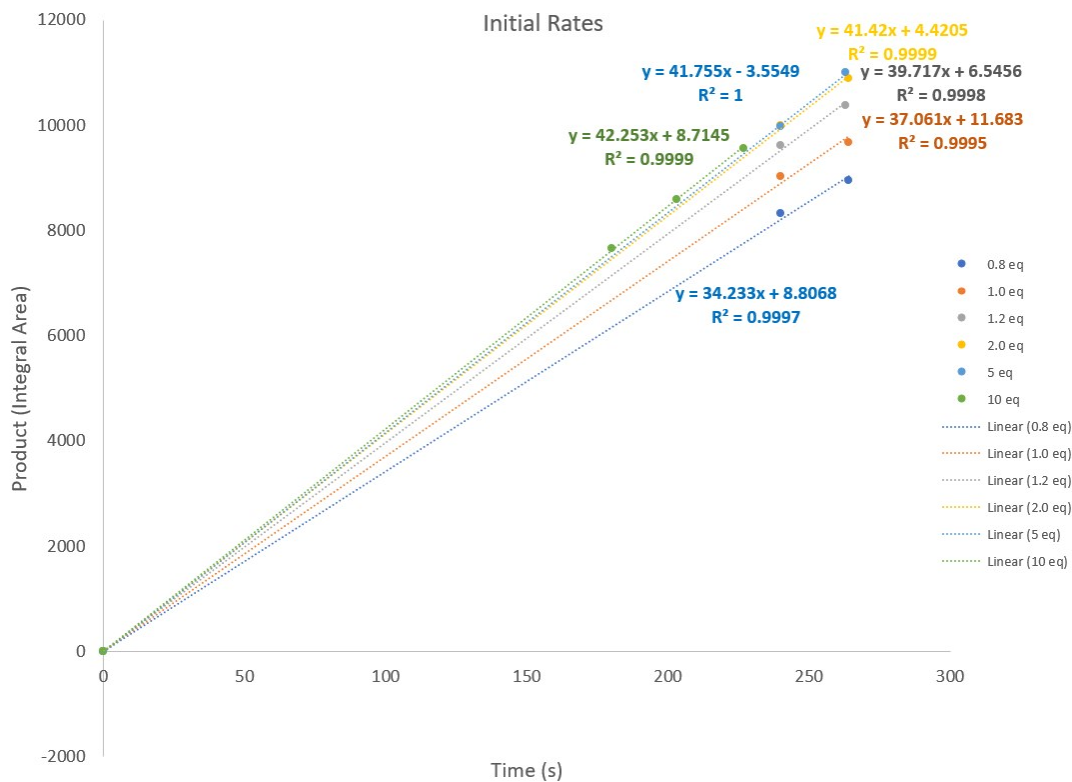

**Figure S69.** Initial Formation of **2** vs. time (s). Experimental conditions as described in section 1.3.

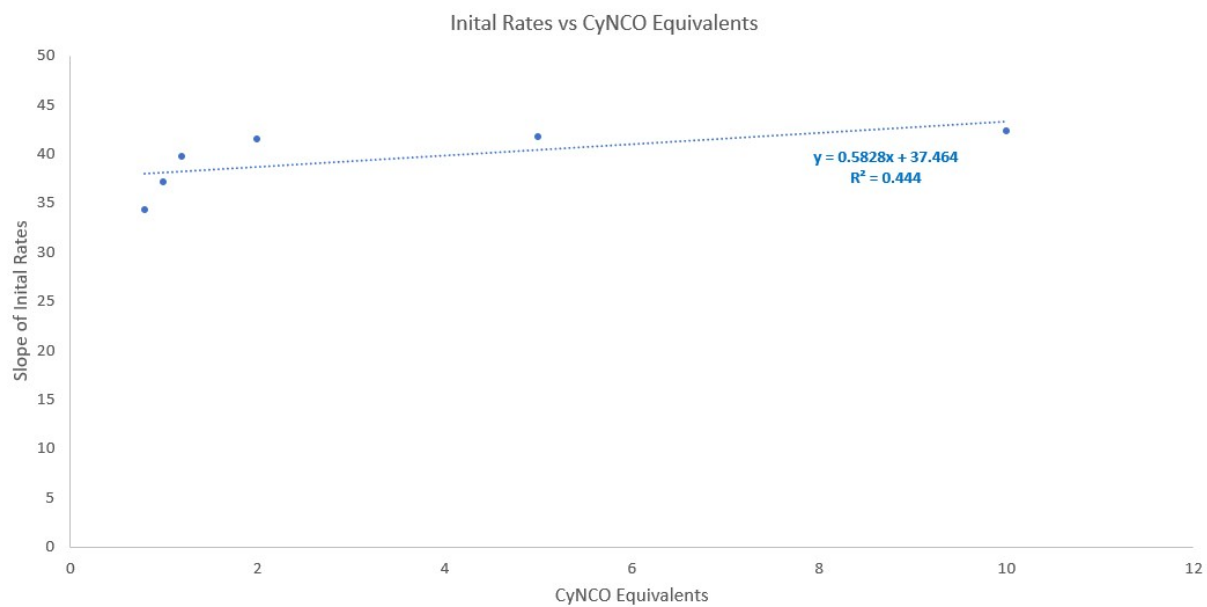

**Figure S70.** Slope of initial formation of **2** vs. CyNCO equivalents. Experimental conditions as described in section 1.3.

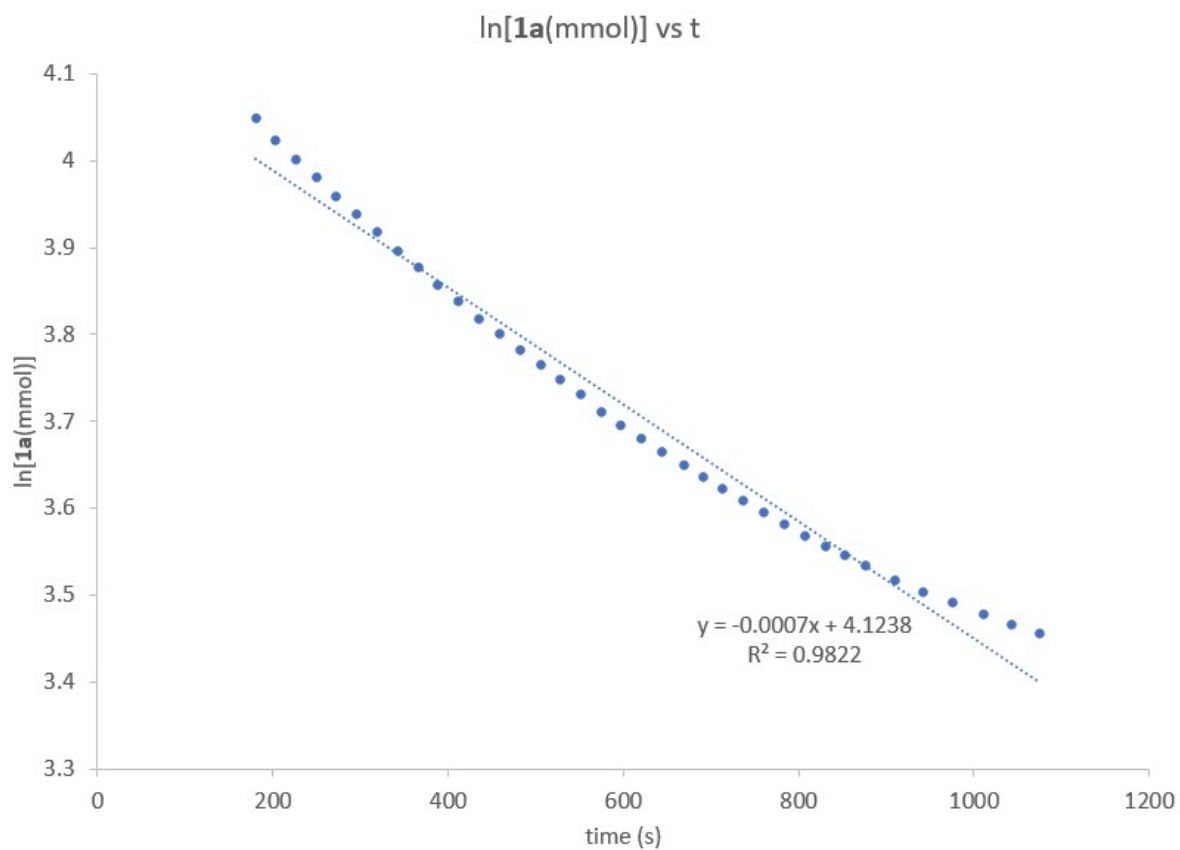

**Figure S71.** ln[**1a**(mmol)] vs t (s) for consumption of **1a** with 10 eq of CyNCO. Experimental conditions as described in section 1.3.

#### 4. Thermodynamic Studies

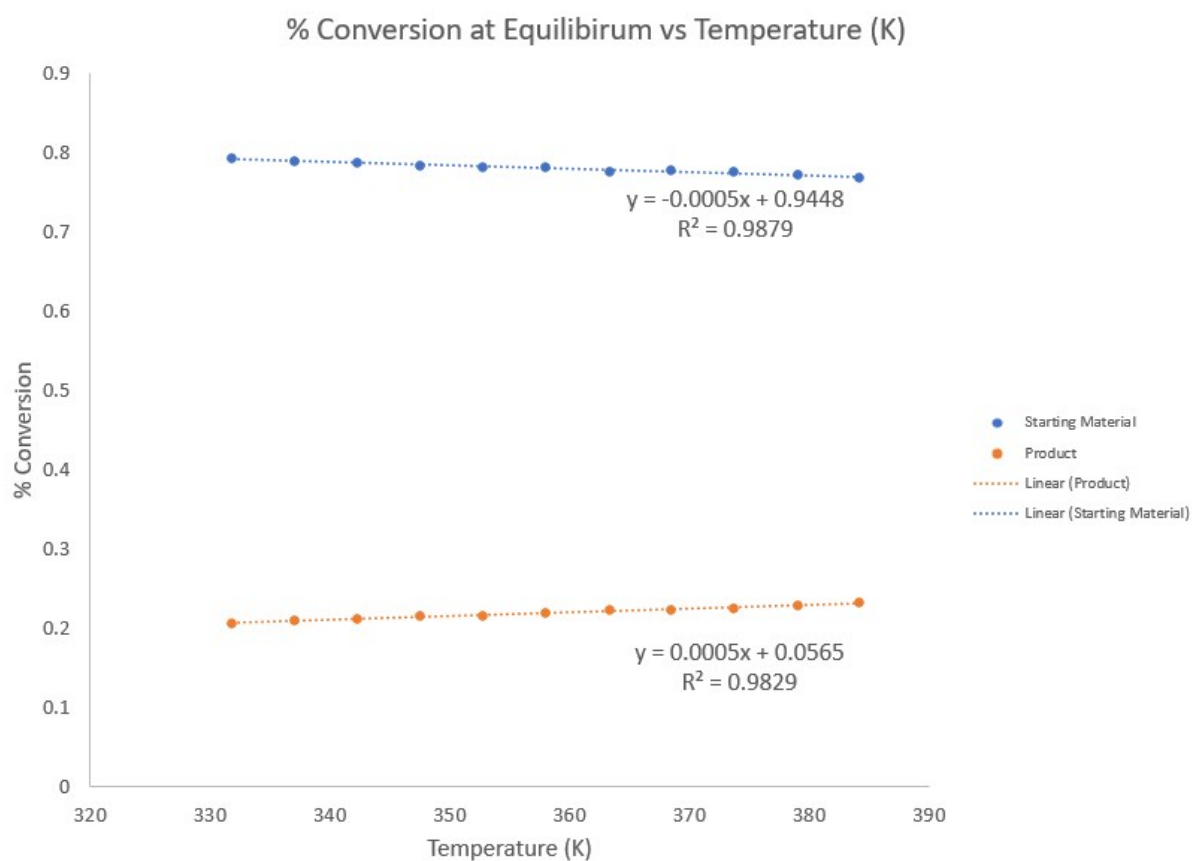

**Figure S72.** Conversion of **1a** to **2** at Equilibrium vs Temperature (K). Experimental conditions as described in section 1.4.



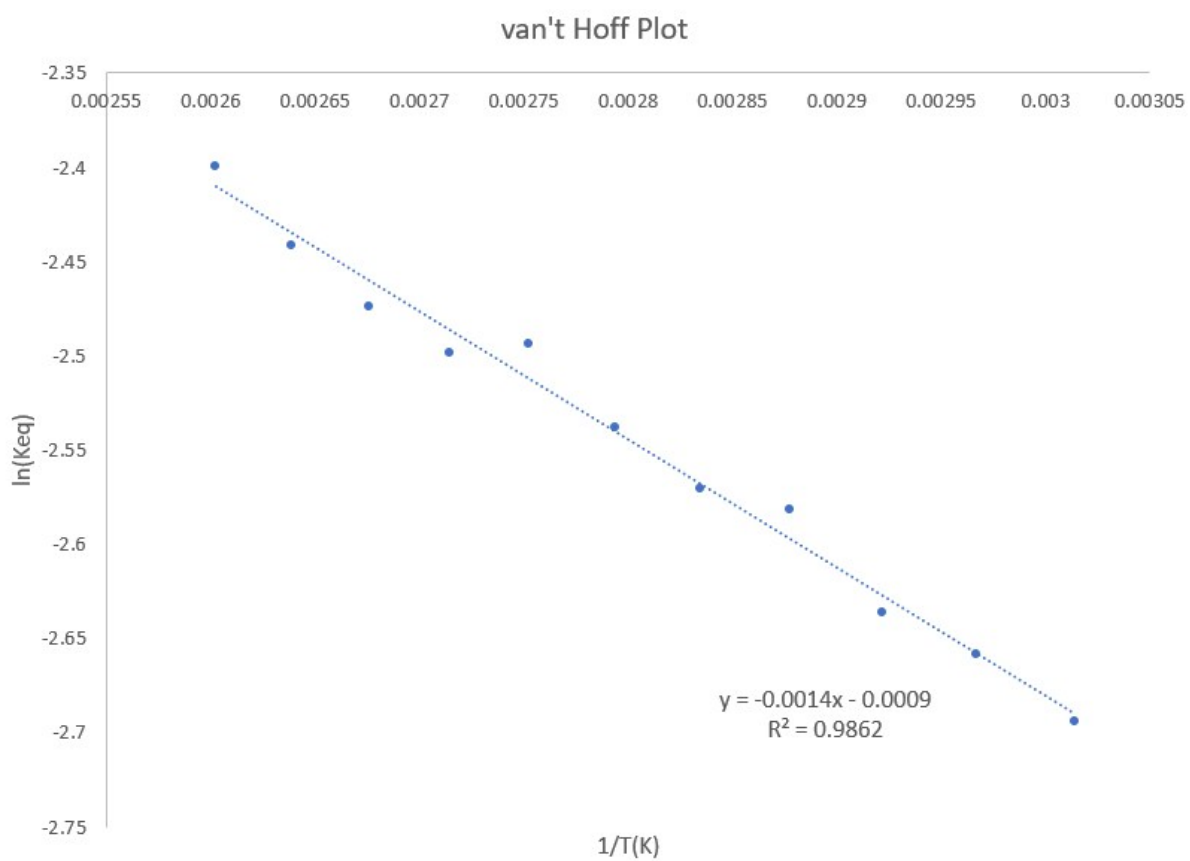

**Figure S73.** Van't Hoff Plot for Conversion of **1a** to **2**. Experimental conditions as described in section 1.4.

## 5. Crystallographic Tables

**Table S1.** Selected X-ray data collection and refinement parameters for **1a**, **1b**, **1c** and **2**.

|                                                  | <b>1a</b>                                                                      | <b>1b</b>                                                                      | <b>1c</b>                                                                      | <b>2</b>                                                                       |
|--------------------------------------------------|--------------------------------------------------------------------------------|--------------------------------------------------------------------------------|--------------------------------------------------------------------------------|--------------------------------------------------------------------------------|
| Formula                                          | C <sub>32</sub> H <sub>10</sub> BF <sub>15</sub> N <sub>2</sub> O <sub>2</sub> | C <sub>32</sub> H <sub>22</sub> BF <sub>15</sub> N <sub>2</sub> O <sub>2</sub> | C <sub>26</sub> H <sub>10</sub> BF <sub>15</sub> N <sub>2</sub> O <sub>2</sub> | C <sub>32</sub> H <sub>16</sub> BF <sub>15</sub> N <sub>2</sub> O <sub>2</sub> |
| CCDC                                             | 1907920                                                                        | 1907921                                                                        | 1907922                                                                        | 1907923                                                                        |
| Fw [g mol <sup>-1</sup> ]                        | 750.23                                                                         | 762.32                                                                         | 678.17                                                                         | 756.28                                                                         |
| Crystal system                                   | triclinic                                                                      | monoclinic                                                                     | monoclinic                                                                     | monoclinic                                                                     |
| Space group                                      | <i>P</i> -1                                                                    | <i>C</i> 2/ <i>c</i>                                                           | <i>P</i> 2 <sub>1</sub> / <i>c</i>                                             | <i>P</i> 2 <sub>1</sub> / <i>c</i>                                             |
| <i>a</i> (Å)                                     | 9.1684(3)                                                                      | 16.6110(5)                                                                     | 8.63710(10)                                                                    | 13.9196(2)                                                                     |
| <i>b</i> (Å)                                     | 12.0068(3)                                                                     | 10.3630(2)                                                                     | 20.2199(2)                                                                     | 9.8620(2)                                                                      |
| <i>c</i> (Å)                                     | 14.3299(4)                                                                     | 36.6152(9)                                                                     | 15.13590(10)                                                                   | 22.3185(5)                                                                     |
| $\alpha$ (°)                                     | 100.589(2)                                                                     | 90                                                                             | 90                                                                             | 90                                                                             |
| $\beta$ (°)                                      | 91.900(2)                                                                      | 103.060(2)                                                                     | 93.8880(10)                                                                    | 96.685(2)                                                                      |
| $\gamma$ (°)                                     | 105.332(2)                                                                     | 90                                                                             | 90                                                                             | 90                                                                             |
| <i>V</i> (Å <sup>3</sup> )                       | 1489.86(8)                                                                     | 6139.9(3)                                                                      | 2637.27(4)                                                                     | 3042.94(10)                                                                    |
| <i>Z</i>                                         | 2                                                                              | 8                                                                              | 4                                                                              | 4                                                                              |
| Radiation, $\lambda$ (Å)                         | Cu K $\alpha$ , 1.54184                                                        |
| Temp (K)                                         | 150(2)                                                                         | 150(2)                                                                         | 150(2)                                                                         | 150(2)                                                                         |
| $\rho_{\text{calc}}$ (g cm <sup>-3</sup> )       | 1.672                                                                          | 1.649                                                                          | 1.708                                                                          | 1.651                                                                          |
| $\mu$ (mm <sup>-1</sup> )                        | 1.523                                                                          | 1.480                                                                          | 1.639                                                                          | 1.492                                                                          |
| Reflections collected                            | 30308                                                                          | 31445                                                                          | 32653                                                                          | 25771                                                                          |
| Independent reflections                          | 6085                                                                           | 6370                                                                           | 5481                                                                           | 6309                                                                           |
| Parameters                                       | 469                                                                            | 469                                                                            | 431                                                                            | 469                                                                            |
| R(int)                                           | 0.0241                                                                         | 0.0381                                                                         | 0.0231                                                                         | 0.0335                                                                         |
| R1/wR2, <sup>[a]</sup> I $\geq$ 2 $\sigma$ I (%) | 3.33/8.92                                                                      | 6.78/20.33                                                                     | 3.50/9.13                                                                      | 4.09/10.81                                                                     |
| R1/wR2, <sup>[a]</sup> all data (%)              | 3.83/9.52                                                                      | 7.32/21.17                                                                     | 3.72/9.35                                                                      | 5.45/12.00                                                                     |
| GOF                                              | 1.068                                                                          | 1.119                                                                          | 1.027                                                                          | 1.032                                                                          |

<sup>[a]</sup> R1 =  $[\sum||F_o| - |F_c||]/\sum|F_o|$ ; wR2 =  $\{[\sum w[(F_o)^2 - (F_c)^2]^2]/[\sum w(F_o)^2]\}^{1/2}$ ; w =  $[\sigma^2(F_o)^2 + (AP)^2 + BP]^{-1}$ , where P =  $[(F_o)^2 + 2(F_c)^2]/3$  and the A and B values are 0.0459 and 0.56 for **1a**, 0.0810 and 39.59 for **1b**, 0.0475 and 0.98 for **1c**, and 0.0618 and 0.85 for **2**.

**Table S2.** Selected X-ray data collection and refinement parameters for **3a**·0.75hex, **3b**, **3c** and **3d**.

|                                                  | <b>3a</b> ·0.75hex                                                                 | <b>3b</b>                                                                      | <b>3c</b>                                                                      | <b>3d</b>                                                                        |
|--------------------------------------------------|------------------------------------------------------------------------------------|--------------------------------------------------------------------------------|--------------------------------------------------------------------------------|----------------------------------------------------------------------------------|
| Formula                                          | C <sub>36.5</sub> H <sub>26.5</sub> BF <sub>15</sub> N <sub>2</sub> O <sub>2</sub> | C <sub>29</sub> H <sub>16</sub> BF <sub>15</sub> N <sub>2</sub> O <sub>2</sub> | C <sub>33</sub> H <sub>18</sub> BF <sub>15</sub> N <sub>2</sub> O <sub>2</sub> | C <sub>32</sub> H <sub>15</sub> BClF <sub>15</sub> N <sub>2</sub> O <sub>2</sub> |
| CCDC                                             | 1907924                                                                            | 1907925                                                                        | 1907926                                                                        | 1907927                                                                          |
| Fw [g mol <sup>-1</sup> ]                        | 820.91                                                                             | 720.25                                                                         | 770.30                                                                         | 790.72                                                                           |
| Crystal system                                   | triclinic                                                                          | triclinic                                                                      | monoclinic                                                                     | monoclinic                                                                       |
| Space group                                      | <i>P</i> -1                                                                        | <i>P</i> -1                                                                    | <i>P</i> 2 <sub>1</sub> / <i>n</i>                                             | <i>P</i> 2 <sub>1</sub>                                                          |
| <i>a</i> (Å)                                     | 12.7339(4)                                                                         | 9.1546(3)                                                                      | 14.4113(2)                                                                     | 15.00220(10)                                                                     |
| <i>b</i> (Å)                                     | 14.6283(5)                                                                         | 10.4650(3)                                                                     | 12.5047(2)                                                                     | 12.8083(2)                                                                       |
| <i>c</i> (Å)                                     | 21.2277(7)                                                                         | 32.5941(9)                                                                     | 35.4165(4)                                                                     | 17.2649(2)                                                                       |
| $\alpha$ (°)                                     | 77.984(3)                                                                          | 89.932(2)                                                                      | 90                                                                             | 90                                                                               |
| $\beta$ (°)                                      | 76.287(3)                                                                          | 87.734(2)                                                                      | 91.0590(10)                                                                    | 104.1050(10)                                                                     |
| $\gamma$ (°)                                     | 69.659(3)                                                                          | 64.836(3)                                                                      | 90                                                                             | 90                                                                               |
| <i>V</i> (Å <sup>3</sup> )                       | 3567.4(2)                                                                          | 2823.63(16)                                                                    | 6381.28(15)                                                                    | 3217.48(7)                                                                       |
| <i>Z</i>                                         | 4                                                                                  | 4                                                                              | 8                                                                              | 4                                                                                |
| Radiation, $\lambda$ (Å)                         | Cu K $\alpha$ , 1.54184                                                            | Cu K $\alpha$ , 1.54184                                                        | Cu K $\alpha$ , 1.54184                                                        | Cu K $\alpha$ , 1.54184                                                          |
| Temp (K)                                         | 150(2)                                                                             | 150(2)                                                                         | 150(2)                                                                         | 150(2)                                                                           |
| $\rho_{\text{calc}}$ (g cm <sup>-3</sup> )       | 1.528                                                                              | 1.694                                                                          | 1.604                                                                          | 1.632                                                                            |
| $\mu$ (mm <sup>-1</sup> )                        | 1.319                                                                              | 1.570                                                                          | 1.435                                                                          | 2.187                                                                            |
| Reflections collected                            | 39525                                                                              | 25899                                                                          | 36270                                                                          | 41515                                                                            |
| Independent reflections                          | 14767                                                                              | 9955                                                                           | 13144                                                                          | 12803                                                                            |
| Parameters                                       | 1073                                                                               | 883                                                                            | 955                                                                            | 955                                                                              |
| R(int)                                           | 0.0350                                                                             | 0.0237                                                                         | 0.0288                                                                         | 0.0429                                                                           |
| R1/wR2, <sup>[a]</sup> I $\geq$ 2 $\sigma$ I (%) | 4.50/11.20                                                                         | 6.97/19.98                                                                     | 4.77/11.34                                                                     | 3.35/8.41                                                                        |
| R1/wR2, <sup>[a]</sup> all data (%)              | 6.13/12.38                                                                         | 7.28/20.10                                                                     | 5.54/11.73                                                                     | 3.65/8.73                                                                        |
| GOF                                              | 1.016                                                                              | 1.174                                                                          | 1.137                                                                          | 1.033                                                                            |

<sup>[a]</sup> R1 =  $[\sum||F_o| - |F_c||]/\sum|F_o|$ ; wR2 =  $\{[\sum w[(F_o)^2 - (F_c)^2]^2]/[\sum w(F_o)^2]\}^{1/2}$ ; w =  $[\sigma^2(F_o)^2 + (AP)^2 + BP]^{-1}$ , where P =  $[(F_o)^2 + 2(F_c)^2]/3$  and the A and B values are 0.0539 and 1.09 for **3a**·0.75hex, 0.0546 and 13.21 for **3b**, 0.0279 and 5.45 for **3c**, and 0.0445 and 0.39 for **3d**.

**Table S3.** Selected X-ray data collection and refinement parameters for **3e**, **3f**, **3g** and **3h**.

|                                                  | <b>3e</b>                                                                        | <b>3f</b>                                                                      | <b>3g</b>                                                                      | <b>3h</b>                                                                      |
|--------------------------------------------------|----------------------------------------------------------------------------------|--------------------------------------------------------------------------------|--------------------------------------------------------------------------------|--------------------------------------------------------------------------------|
| Formula                                          | C <sub>32</sub> H <sub>15</sub> BBrF <sub>15</sub> N <sub>2</sub> O <sub>2</sub> | C <sub>32</sub> H <sub>15</sub> BF <sub>15</sub> N <sub>3</sub> O <sub>4</sub> | C <sub>33</sub> H <sub>18</sub> BF <sub>15</sub> N <sub>2</sub> O <sub>3</sub> | C <sub>33</sub> H <sub>15</sub> BF <sub>18</sub> N <sub>2</sub> O <sub>2</sub> |
| CCDC                                             | 1907928                                                                          | 1907929                                                                        | 1907930                                                                        | 1907931                                                                        |
| Fw [g mol <sup>-1</sup> ]                        | 835.18                                                                           | 801.28                                                                         | 786.30                                                                         | 824.28                                                                         |
| Crystal system                                   | monoclinic                                                                       | monoclinic                                                                     | monoclinic                                                                     | orthorhombic                                                                   |
| Space group                                      | <i>P2<sub>1</sub>/c</i>                                                          | <i>P2<sub>1</sub>/c</i>                                                        | <i>P2<sub>1</sub>/c</i>                                                        | <i>P2<sub>1</sub>2<sub>1</sub>2<sub>1</sub></i>                                |
| <i>a</i> (Å)                                     | 15.5607(5)                                                                       | 12.78170(10)                                                                   | 15.4749(2)                                                                     | 9.5724(2)                                                                      |
| <i>b</i> (Å)                                     | 12.1150(3)                                                                       | 16.79680(10)                                                                   | 12.27710(10)                                                                   | 15.9011(3)                                                                     |
| <i>c</i> (Å)                                     | 33.7225(10)                                                                      | 18.1486(2)                                                                     | 33.3387(3)                                                                     | 41.7343(6)                                                                     |
| $\alpha$ (°)                                     | 90                                                                               | 90                                                                             | 90                                                                             | 90                                                                             |
| $\beta$ (°)                                      | 93.091(3)                                                                        | 100.3400(10)                                                                   | 93.7040(10)                                                                    | 90                                                                             |
| $\gamma$ (°)                                     | 90                                                                               | 90                                                                             | 90                                                                             | 90                                                                             |
| <i>V</i> (Å <sup>3</sup> )                       | 6348.0(3)                                                                        | 3833.08(6)                                                                     | 6320.68(11)                                                                    | 6352.4(2)                                                                      |
| <i>Z</i>                                         | 8                                                                                | 4                                                                              | 8                                                                              | 8                                                                              |
| Radiation, $\lambda$ (Å)                         | Cu K $\alpha$ , 1.54184                                                          | Cu K $\alpha$ , 1.54184                                                        | Cu K $\alpha$ , 1.54184                                                        | Cu K $\alpha$ , 1.54184                                                        |
| Temp (K)                                         | 150(2)                                                                           | 150(2)                                                                         | 150(2)                                                                         | 150(2)                                                                         |
| $\rho_{\text{calc}}$ (g cm <sup>-3</sup> )       | 1.748                                                                            | 1.388                                                                          | 1.653                                                                          | 1.724                                                                          |
| $\mu$ (mm <sup>-1</sup> )                        | 2.918                                                                            | 1.266                                                                          | 1.487                                                                          | 1.629                                                                          |
| Reflections collected                            | 29127                                                                            | 31854                                                                          | 66784                                                                          | 44949                                                                          |
| Independent reflections                          | 12289                                                                            | 7947                                                                           | 13136                                                                          | 12989                                                                          |
| Parameters                                       | 955                                                                              | 497                                                                            | 975                                                                            | 1028                                                                           |
| R(int)                                           | 0.0249                                                                           | 0.0238                                                                         | 0.0256                                                                         | 0.0383                                                                         |
| R1/wR2, <sup>[a]</sup> I $\geq$ 2 $\sigma$ I (%) | 3.92/9.14                                                                        | 3.88/10.49                                                                     | 3.20/8.55                                                                      | 4.19/10.08                                                                     |
| R1/wR2, <sup>[a]</sup> all data (%)              | 4.82/9.59                                                                        | 4.33/10.94                                                                     | 3.86/9.00                                                                      | 5.47/11.10                                                                     |
| GOF                                              | 1.071                                                                            | 1.028                                                                          | 1.023                                                                          | 0.999                                                                          |

<sup>[a]</sup> R1 =  $[\sum||F_o| - |F_c||]/\sum|F_o|$ ; wR2 =  $\{[\sum w[(F_o)^2 - (F_c)^2]^2]/[\sum w(F_o)^2]\}^{1/2}$ ; w =  $[\sigma^2(F_o)^2 + (AP)^2 + BP]^{-1}$ , where P =  $[(F_o)^2 + 2(F_c)^2]/3$  and the A and B values are 0.0358 and 5.88 for **3e**, 0.0581 and 1.38 for **3f**, 0.0440 and 2.24 for **3g**, and 0.0533 and 1.23 for **3d**.

**Table S4.** Selected X-ray data collection and refinement parameters for **4·tol** and **5·hex**.

|                                                  | <b>4·tol</b>                                                                                  | <b>5·hex</b>                                                                                  |
|--------------------------------------------------|-----------------------------------------------------------------------------------------------|-----------------------------------------------------------------------------------------------|
| Formula                                          | C <sub>57</sub> H <sub>18</sub> Al <sub>2</sub> F <sub>30</sub> N <sub>2</sub> O <sub>2</sub> | C <sub>56</sub> H <sub>24</sub> F <sub>30</sub> Ga <sub>2</sub> N <sub>2</sub> O <sub>2</sub> |
| CCDC                                             | 1907932                                                                                       | 1907933                                                                                       |
| Fw [g mol <sup>-1</sup> ]                        | 1386.69                                                                                       | 1466.21                                                                                       |
| Crystal system                                   | triclinic                                                                                     | triclinic                                                                                     |
| Space group                                      | <i>P</i> -1                                                                                   | <i>P</i> -1                                                                                   |
| <i>a</i> (Å)                                     | 11.8016(3)                                                                                    | 9.8455(5)                                                                                     |
| <i>b</i> (Å)                                     | 14.1317(3)                                                                                    | 11.6923(5)                                                                                    |
| <i>c</i> (Å)                                     | 17.4036(5)                                                                                    | 13.4043(7)                                                                                    |
| $\alpha$ (°)                                     | 78.018(2)                                                                                     | 67.685(4)                                                                                     |
| $\beta$ (°)                                      | 75.621(2)                                                                                     | 79.756(4)                                                                                     |
| $\gamma$ (°)                                     | 80.479(2)                                                                                     | 71.222(4)                                                                                     |
| <i>V</i> (Å <sup>3</sup> )                       | 2730.41(12)                                                                                   | 1348.79(12)                                                                                   |
| <i>Z</i>                                         | 2                                                                                             | 1                                                                                             |
| Radiation, $\lambda$ (Å)                         | Cu K $\alpha$ , 1.54184                                                                       | Cu K $\alpha$ , 1.54184                                                                       |
| Temp (K)                                         | 150(2)                                                                                        | 150(2)                                                                                        |
| $\rho_{\text{calc}}$ (g cm <sup>-3</sup> )       | 1.687                                                                                         | 1.805                                                                                         |
| $\mu$ (mm <sup>-1</sup> )                        | 1.866                                                                                         | 2.619                                                                                         |
| Reflections collected                            | 44233                                                                                         | 12718                                                                                         |
| Independent reflections                          | 11307                                                                                         | 5570                                                                                          |
| Parameters                                       | 881                                                                                           | 415                                                                                           |
| R(int)                                           | 0.0349                                                                                        | 0.0355                                                                                        |
| R1/wR2, <sup>[a]</sup> I $\geq$ 2 $\sigma$ I (%) | 10.82/41.24                                                                                   | 3.19/8.09                                                                                     |
| R1/wR2, <sup>[a]</sup> all data (%)              | 11.56/42.19                                                                                   | 3.75/8.56                                                                                     |
| GOF                                              | 1.999                                                                                         | 1.037                                                                                         |

<sup>[a]</sup> R1 =  $[\sum |F_o| - |F_c|] / \sum |F_o|$ ; wR2 =  $\{[\sum w[(F_o)^2 - (F_c)^2]^2] / [\sum w(F_o^2)^2]\}^{1/2}$ ; w =  $[\sigma^2(F_o)^2 + (AP)^2 + BP]^{-1}$ , where P =  $[(F_o)^2 + 2(F_c)^2] / 3$  and the A and B values are 0.2000 and 0 for **4·tol**, and 0.0438 and 0.29 for **5·hex**.

## 6. DFT Studies

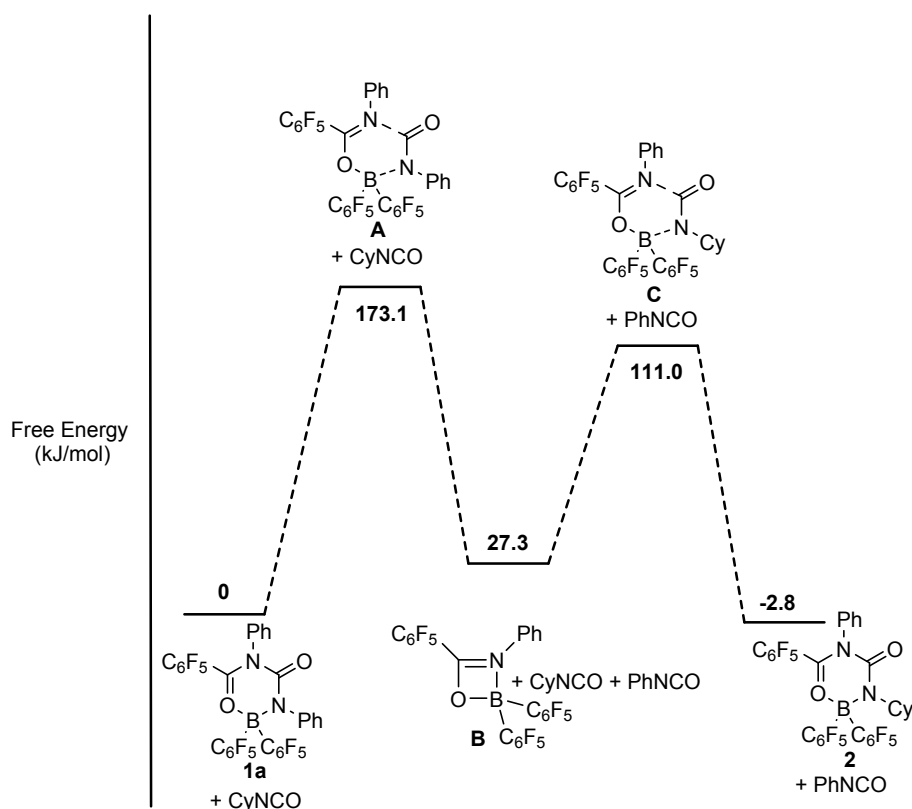

**Figure S74.** Computed isocyanate exchange using CyNCO via disassociative mechanism.

**Table S5.** Computed isocyanate exchange via dissociative mechanism.

| Description              | E [a.u.] | $\Delta E$ [kJ/mol] | G [a.u.] | $\Delta G$ (kJ/mol) |
|--------------------------|----------|---------------------|----------|---------------------|
| <b>1a</b> + CyNCO        | -3407.61 | 0                   | -3407.18 | 0                   |
| <b>A</b> + CyNCO         | -3407.54 | 183.3278            | -3407.11 | 173.1333            |
| <b>B</b> + CyNCO + PhNCO | -3407.57 | 104.3116            | -3407.17 | 27.26844            |
| <b>C</b> + PhNCO         | -3407.57 | 119.0768            | -3407.14 | 111.0481            |
| <b>2</b> + PhNCO         | -3407.62 | -8.81611            | -3407.18 | -2.79878            |

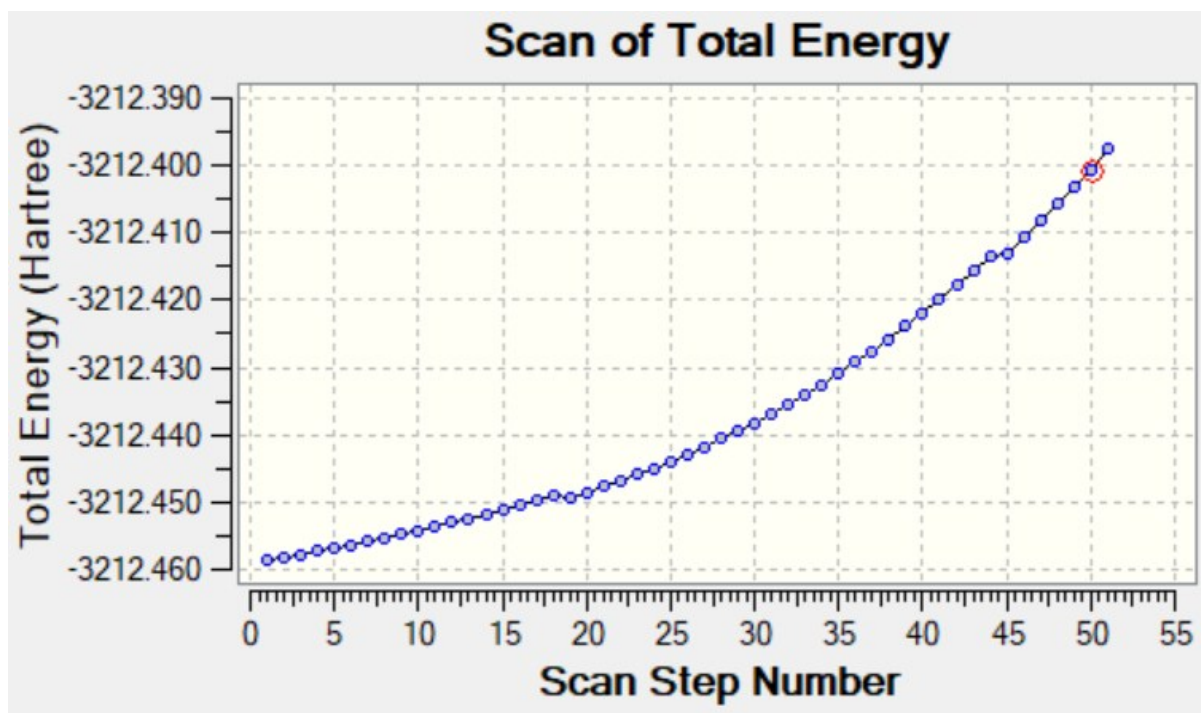

**Figure S75.** Exponential increase in energy for computed isocyanate exchange using MeNCO via associative mechanism.

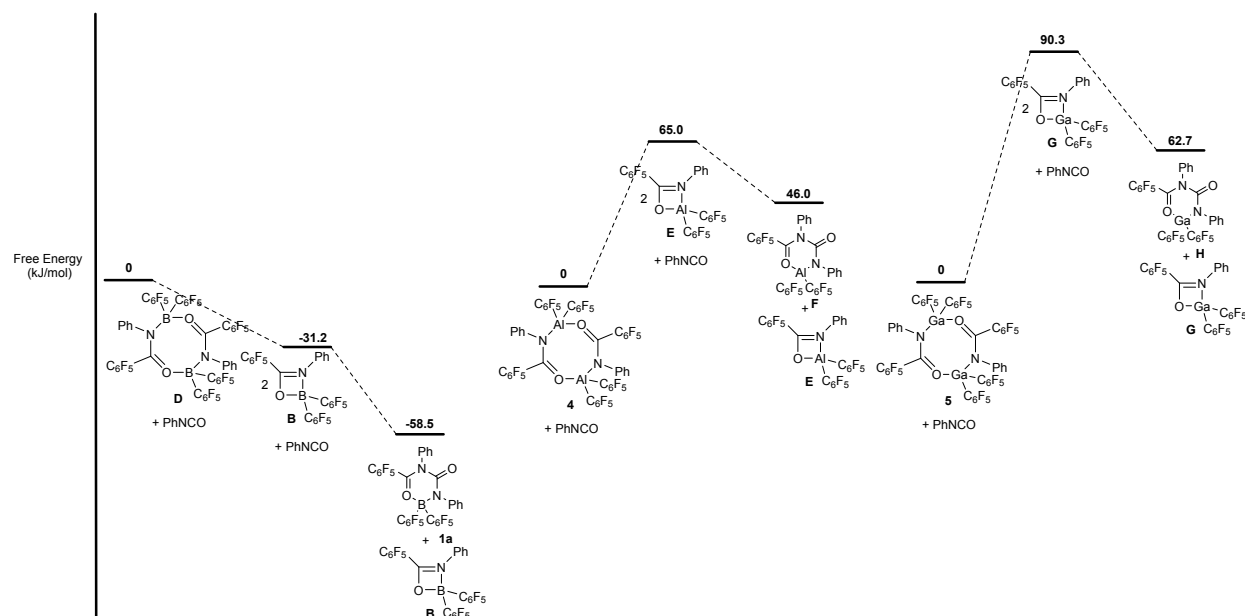

**Figure S76.** Computed energies for head-to-tail dimerization vs PhNCO capture.

**Table S6.** Computed energies for head-to-tail dimerization vs PhNCO capture

| Description          | E [a.u.] | $\Delta E$ [kJ/mol] | G [a.u.] | $\Delta G$ (kJ/mol) |
|----------------------|----------|---------------------|----------|---------------------|
| <b>D</b> + PhNCO     | -5610.07 | 0                   | -5609.58 | 0                   |
| <b>2B</b> + PhNCO    | -5610.05 | 62.08404            | -5609.59 | -31.2461            |
| <b>1a</b> + <b>B</b> | -5610.09 | -42.2275            | -5609.6  | -58.5145            |
| <b>4</b> + PhNCO     | -6045.17 | 0                   | -6044.7  | 0                   |
| <b>2E</b> + PhNCO    | -6045.12 | 143.4915            | -6044.68 | 65.04414            |
| <b>F</b> + <b>E</b>  | -6045.15 | 53.41148            | -6044.68 | 45.96463            |
| <b>5</b> + PhNCO     | -9405.81 | 0                   | -9405.34 | 0                   |
| <b>2G</b> + PhNCO    | -9405.74 | 176.4574            | -9405.3  | 90.3067             |
| <b>H</b> + <b>G</b>  | -9405.78 | 78.17722            | -9405.31 | 62.7337             |

## 6.1 Geometry Optimized Structures

### 6.1.1. PhNCO

Charge = 0 Multiplicity = 1

```
O      -2.0722  -0.46787  0.
C      -0.6422  -0.46789  0.
N       0.6514  -0.4679   0.00001
C       2.1214  -0.46791  0.00002
C       2.81892 -0.94869 -1.10848
C       2.8189   0.0128   1.10815
C       4.21364 -0.94934 -1.1085
H       2.26874 -1.32832 -1.98164
C       4.21404  0.01314  1.1079
H       2.2693   0.39193  1.98184
C       4.91146 -0.46794 -0.00011
H       4.7635  -1.32885 -1.98194
H       4.76372  0.39261  1.98159
H       6.01114 -0.4685  -0.00038
```



### 6.1.2. CyNCO

Charge = 0 Multiplicity = 1

|   |         |          |          |
|---|---------|----------|----------|
| O | -2.0722 | -0.46787 | 0.       |
| C | -0.6422 | -0.46789 | 0.       |
| N | 0.6514  | -0.4679  | 0.00001  |
| C | 2.1214  | -0.46791 | 0.00002  |
| C | 2.62941 | -1.89081 | -0.11423 |
| C | 2.62942 | 0.38976  | -1.1414  |
| H | 2.45877 | -0.02855 | 0.97537  |
| C | 4.14144 | -1.93166 | -0.20157 |
| H | 2.19035 | -2.37077 | -1.02814 |
| H | 2.28865 | -2.48352 | 0.77414  |
| C | 4.14152 | 0.34954  | -1.22821 |
| H | 2.19049 | 0.02384  | -2.10669 |
| H | 2.2896  | 1.44803  | -0.99635 |
| C | 4.65049 | -1.073   | -1.3412  |
| H | 4.48075 | -2.98991 | -0.3481  |
| H | 4.58052 | -1.5676  | 0.76438  |
| H | 4.48228 | 0.94184  | -2.11681 |
| H | 4.57991 | 0.8305   | -0.31444 |
| H | 5.77146 | -1.07208 | -1.33891 |
| H | 4.31568 | -1.51248 | -2.31747 |

### 6.1.3. Compound 1a

Charge = 0 Multiplicity = 1

|   |          |         |          |
|---|----------|---------|----------|
| F | -2.9232  | 6.49211 | 9.10782  |
| F | -1.87491 | 10.3524 | 7.27272  |
| F | 2.05138  | 7.30538 | 13.32688 |
| F | 0.7327   | 8.99796 | 7.45296  |
| F | 4.25924  | 5.78904 | 13.5981  |
| F | 1.77703  | 6.08986 | 8.78543  |

|   |          |          |          |
|---|----------|----------|----------|
| F | -3.01237 | 5.14959  | 6.81364  |
| F | 5.26393  | 4.45317  | 11.44788 |
| F | 4.06716  | 4.65928  | 9.03005  |
| F | -0.235   | 10.72488 | 11.70136 |
| F | -1.96669 | 12.98113 | 7.08543  |
| F | 0.61111  | 7.6371   | 5.15378  |
| O | 0.41058  | 8.4176   | 10.26051 |
| F | -1.34277 | 14.54872 | 9.22374  |
| O | -2.59879 | 6.92106  | 12.44527 |
| F | -1.25336 | 5.68893  | 4.82357  |
| F | -0.42718 | 13.3904  | 11.51684 |
| N | -0.50957 | 6.74842  | 11.5086  |
| N | -1.99896 | 8.44756  | 10.83098 |
| C | 0.52325  | 7.34867  | 10.93943 |
| C | -1.83987 | 7.39506  | 11.63867 |
| C | -1.11969 | 7.86338  | 8.37309  |
| C | -2.03509 | 6.84045  | 8.15163  |
| C | -1.47022 | 11.04828 | 8.35427  |
| C | 1.86839  | 6.71775  | 11.05073 |
| C | -3.24778 | 9.16744  | 10.9692  |
| C | -1.02178 | 10.39763 | 9.49161  |
| C | 2.41703  | 6.06641  | 9.9567   |
| C | 2.5351   | 6.64788  | 12.26143 |
| C | 3.57314  | 5.31543  | 10.07629 |
| C | -0.22411 | 8.06003  | 7.32447  |
| C | 3.67726  | 5.8929   | 12.40396 |
| C | -0.39434 | 5.42719  | 12.1101  |
| C | -2.09762 | 6.12041  | 6.97664  |
| C | 4.18513  | 5.22052  | 11.30916 |
| C | -0.25537 | 7.36841  | 6.14159  |
| C | -1.56454 | 12.42471 | 8.24049  |
| C | -4.10015 | 9.28936  | 9.88464  |
| H | -3.8806  | 8.89656  | 9.07076  |

|   |          |          |          |
|---|----------|----------|----------|
| C | -0.68056 | 11.24519 | 10.53614 |
| C | -1.20961 | 6.39175  | 5.96585  |
| C | -0.22448 | 5.29917  | 13.47856 |
| H | -0.12973 | 6.05012  | 14.01892 |
| C | -1.23815 | 13.21482 | 9.31536  |
| C | -0.78576 | 12.62026 | 10.47334 |
| C | -0.53352 | 4.3366   | 11.28436 |
| H | -0.64221 | 4.44556  | 10.36719 |
| C | -3.56084 | 9.75744  | 12.17904 |
| H | -2.98568 | 9.66972  | 12.90457 |
| B | -1.00311 | 8.7909   | 9.70959  |
| C | -5.60151 | 10.59831 | 11.23004 |
| H | -6.39376 | 11.07701 | 11.31992 |
| C | -5.28728 | 10.00313 | 10.01973 |
| H | -5.8688  | 10.08029 | 9.29809  |
| C | -4.73911 | 10.48221 | 12.30579 |
| H | -4.94861 | 10.89    | 13.11494 |
| C | -0.19905 | 4.02403  | 14.02396 |
| H | -0.07754 | 3.91364  | 14.93935 |
| C | -0.50811 | 3.06549  | 11.85197 |
| H | -0.59574 | 2.31401  | 11.31113 |
| C | -0.35354 | 2.91859  | 13.21214 |
| H | -0.35322 | 2.06747  | 13.58699 |

#### 6.1.4. Compound A

Charge = 0 Multiplicity = 1

|   |          |          |          |
|---|----------|----------|----------|
| F | 1.57204  | 1.73299  | 2.28988  |
| F | 3.16526  | 2.27492  | -0.75515 |
| F | -2.45793 | -2.95679 | -1.18524 |
| F | -0.55167 | 2.35037  | -1.88768 |
| F | -4.79826 | -2.89296 | -2.54094 |
| F | -2.83408 | 1.6544   | -0.3215  |

|   |          |          |          |
|---|----------|----------|----------|
| F | 0.87974  | 4.19575  | 2.99674  |
| F | -6.14555 | -0.55301 | -2.79726 |
| F | -5.16425 | 1.72114  | -1.6912  |
| F | 1.52018  | -2.10523 | -1.51355 |
| F | 5.51437  | 1.55032  | -1.77888 |
| F | -1.22954 | 4.84604  | -1.16074 |
| O | -0.26473 | -0.2737  | -0.80283 |
| F | 5.89531  | -0.98427 | -2.6705  |
| O | -0.00553 | -3.05019 | 2.00299  |
| F | -0.51657 | 5.78338  | 1.2959   |
| F | 3.8828   | -2.79775 | -2.53337 |
| N | -1.11145 | -1.22399 | 1.10478  |
| N | 1.24369  | -1.12652 | 1.49499  |
| C | -1.25312 | -0.69425 | -0.07466 |
| C | 0.22748  | -1.92481 | 1.60863  |
| C | 0.5208   | 1.92534  | 0.16959  |
| C | 0.87861  | 2.44854  | 1.40973  |
| C | 3.29097  | 1.01967  | -1.18673 |
| C | -2.58143 | -0.64721 | -0.74503 |
| C | 2.5431   | -1.63357 | 1.6767   |
| C | 2.21791  | 0.12528  | -1.10384 |
| C | -3.28692 | 0.54203  | -0.89288 |
| C | -3.10963 | -1.80636 | -1.30807 |
| C | -4.49249 | 0.58458  | -1.57802 |
| C | -0.19113 | 2.78058  | -0.67102 |
| C | -4.31036 | -1.78421 | -2.00403 |
| C | -2.29165 | -1.47552 | 1.88714  |
| C | 0.53078  | 3.738    | 1.79906  |
| C | -4.9987  | -0.58321 | -2.13978 |
| C | -0.54877 | 4.07378  | -0.32052 |
| C | 4.52511  | 0.66569  | -1.71219 |
| C | 3.56861  | -0.70985 | 1.92755  |
| H | 3.31154  | 0.3375   | 2.03063  |

|   |          |          |          |
|---|----------|----------|----------|
| C | 2.46603  | -1.17143 | -1.57518 |
| C | -0.18389 | 4.55312  | 0.93099  |
| C | -2.80153 | -2.76278 | 2.03389  |
| H | -2.30335 | -3.59227 | 1.54976  |
| C | 4.72305  | -0.63143 | -2.16821 |
| C | 3.68935  | -1.55818 | -2.09979 |
| C | -2.89066 | -0.38312 | 2.51198  |
| H | -2.46037 | 0.60661  | 2.39189  |
| C | 2.88302  | -2.99089 | 1.54948  |
| H | 2.10427  | -3.72073 | 1.3643   |
| B | 0.8746   | 0.50028  | -0.42417 |
| C | 5.21872  | -2.47309 | 1.92078  |
| H | 6.25032  | -2.79886 | 2.0156   |
| C | 4.88813  | -1.12649 | 2.05083  |
| H | 5.66323  | -0.39137 | 2.25039  |
| C | 4.20731  | -3.39675 | 1.67156  |
| H | 4.44863  | -4.45133 | 1.56867  |
| C | -3.93744 | -2.94604 | 2.81556  |
| H | -4.34367 | -3.94542 | 2.93674  |
| C | -4.02733 | -0.58166 | 3.28767  |
| H | -4.49805 | 0.26518  | 3.77718  |
| C | -4.55058 | -1.86276 | 3.44011  |
| H | -5.43575 | -2.01771 | 4.04948  |

### 6.1.5. Compound B

Charge = 0 Multiplicity = 1

|   |          |          |          |
|---|----------|----------|----------|
| F | 0.95004  | 2.25489  | 2.17371  |
| F | 3.55836  | 1.33294  | -1.01499 |
| F | -2.99465 | -2.74255 | 0.68235  |
| F | 0.7644   | 1.30823  | -2.46237 |
| F | -5.17474 | -3.344   | -0.79023 |
| F | -2.19606 | 1.01619  | -2.04898 |

|   |          |          |          |
|---|----------|----------|----------|
| F | 0.55531  | 4.82399  | 1.65107  |
| F | -5.85633 | -1.77896 | -2.89597 |
| F | -4.36784 | 0.39491  | -3.52962 |
| F | 1.27493  | -2.7742  | -0.43859 |
| F | 5.48847  | 0.06136  | -2.32771 |
| F | 0.37039  | 3.90641  | -2.96211 |
| O | -0.23139 | -0.55025 | -0.56471 |
| F | 5.35458  | -2.62724 | -2.71988 |
| F | 0.26122  | 5.6911   | -0.91042 |
| F | 3.22757  | -4.02932 | -1.75882 |
| N | -1.32861 | -0.30073 | 1.41105  |
| C | -1.30179 | -0.54619 | 0.10267  |
| C | 0.88007  | 1.64723  | -0.12739 |
| C | 0.81329  | 2.60014  | 0.88602  |
| C | 3.4108   | 0.01508  | -1.20027 |
| C | -2.54549 | -0.84364 | -0.6429  |
| C | 2.29429  | -0.6525  | -0.70672 |
| C | -2.90141 | -0.06482 | -1.74423 |
| C | -3.32753 | -1.95591 | -0.33349 |
| C | -4.02256 | -0.36773 | -2.50341 |
| C | 0.7197   | 2.14645  | -1.42079 |
| C | -4.44603 | -2.27839 | -1.08791 |
| C | -2.56505 | 0.01644  | 2.07145  |
| C | 0.61062  | 3.95655  | 0.64301  |
| C | -4.79037 | -1.48073 | -2.17451 |
| C | 0.51632  | 3.48814  | -1.70731 |
| C | 4.44209  | -0.62651 | -1.87647 |
| C | 2.28515  | -2.0312  | -0.91294 |
| C | 0.4596   | 4.40196  | -0.66154 |
| C | -3.10687 | -0.83815 | 3.02717  |
| H | -2.59021 | -1.7526  | 3.28795  |
| C | 4.37846  | -1.99842 | -2.07525 |
| C | 3.29178  | -2.71078 | -1.58532 |

|   |          |          |         |
|---|----------|----------|---------|
| C | -3.19153 | 1.21509  | 1.7364  |
| H | -2.73089 | 1.87769  | 1.00895 |
| B | 1.06888  | 0.04085  | 0.08267 |
| C | -4.30399 | -0.48594 | 3.63978 |
| H | -4.7337  | -1.14469 | 4.38778 |
| C | -4.39274 | 1.55201  | 2.35012 |
| H | -4.88516 | 2.48423  | 2.09221 |
| C | -4.94871 | 0.70158  | 3.30169 |
| H | -5.88289 | 0.968    | 3.78657 |

### 6.1.6. Compound C

Charge = 0 Multiplicity = 1

|   |          |          |          |
|---|----------|----------|----------|
| F | -3.12905 | -0.57865 | 2.01355  |
| F | -1.17363 | -3.09873 | -0.73291 |
| F | -4.76682 | 1.25349  | 2.99304  |
| F | -0.19647 | 0.04974  | 2.67531  |
| F | -0.61704 | -5.05835 | 0.93936  |
| F | -1.32042 | 2.66297  | -0.93901 |
| O | 0.27858  | 0.70769  | -0.14817 |
| F | 2.45166  | 0.68098  | 2.13371  |
| F | -4.72115 | 3.80478  | 2.04692  |
| F | 2.84729  | 1.61671  | -2.46468 |
| F | 5.67888  | 3.7281   | 0.61976  |
| F | 4.46765  | 2.40661  | 2.65708  |
| F | -2.97768 | 4.47538  | 0.06693  |
| F | 0.17593  | -4.5392  | 3.49353  |
| F | 0.38305  | -1.9567  | 4.33665  |
| F | 4.87175  | 3.32921  | -1.94129 |
| O | -0.27101 | -1.49783 | -3.38072 |
| N | -1.48841 | -0.51655 | -1.56207 |
| N | 1.56166  | -0.94225 | -1.03228 |
| C | 2.58598  | 1.12356  | -0.17518 |

|   |          |          |          |
|---|----------|----------|----------|
| C | -2.07859 | 0.95702  | 0.53171  |
| C | 1.45086  | 0.19672  | -0.47523 |
| C | -0.7069  | -1.40642 | 0.88545  |
| C | -3.01531 | 0.65968  | 1.52207  |
| C | -3.89925 | 1.59799  | 2.04549  |
| C | -2.11578 | 2.27415  | 0.06615  |
| C | -0.79758 | -2.74214 | 0.51005  |
| C | -0.51111 | -3.8012  | 1.36448  |
| C | -0.29726 | -1.19868 | 2.20348  |
| C | -2.9473  | -0.39389 | -1.9754  |
| H | -3.43234 | -0.06677 | -1.05296 |
| C | 2.813    | -1.51947 | -1.30216 |
| C | 3.23051  | 1.80161  | -1.20348 |
| C | -2.98605 | 3.23873  | 0.55789  |
| C | -3.87978 | 2.89902  | 1.56492  |
| C | 4.05831  | 2.21807  | 1.408    |
| C | -0.78062 | -1.03472 | -2.45339 |
| C | 3.01432  | 1.34688  | 1.12801  |
| C | -0.10434 | -3.54071 | 2.66415  |
| C | 0.00324  | -2.22322 | 3.08985  |
| C | 4.68281  | 2.89157  | 0.3639   |
| C | 3.17621  | -1.79492 | -2.62386 |
| H | 2.50345  | -1.51209 | -3.42691 |
| C | 3.6679   | -1.89455 | -0.25956 |
| H | 3.36499  | -1.70409 | 0.76637  |
| B | -0.95288 | -0.08158 | -0.02375 |
| C | -3.11232 | 0.68186  | -3.04185 |
| H | -2.56044 | 0.38049  | -3.94431 |
| H | -2.67304 | 1.62063  | -2.69277 |
| C | 4.27259  | 2.68304  | -0.94765 |
| C | -3.54238 | -1.72898 | -2.40691 |
| H | -3.40643 | -2.4721  | -1.61661 |
| H | -3.01415 | -2.1016  | -3.2962  |



|   |          |          |          |
|---|----------|----------|----------|
| C | -5.0228  | -1.5441  | -2.74674 |
| H | -5.44107 | -2.50039 | -3.07767 |
| H | -5.56996 | -1.26479 | -1.83581 |
| C | -4.592   | 0.85477  | -3.38863 |
| H | -5.1231  | 1.25155  | -2.51242 |
| H | -4.69608 | 1.60514  | -4.17927 |
| C | -5.22514 | -0.46873 | -3.81191 |
| H | -4.77102 | -0.80314 | -4.75504 |
| H | -6.29323 | -0.33073 | -4.01156 |
| C | 5.24677  | -2.77799 | -1.8585  |
| H | 6.19151  | -3.26687 | -2.07568 |
| C | 4.87796  | -2.51901 | -0.54131 |
| H | 5.53356  | -2.80722 | 0.27545  |
| C | 4.39125  | -2.41281 | -2.89546 |
| H | 4.66973  | -2.61341 | -3.92607 |

### 6.1.7. Compound 2

Charge = 0 Multiplicity = 1

|   |          |          |          |
|---|----------|----------|----------|
| F | 5.39753  | 4.26692  | 17.0257  |
| F | 9.37736  | 3.54783  | 15.54727 |
| F | 2.76281  | 4.61804  | 17.23602 |
| F | 6.85788  | 7.00777  | 17.58443 |
| F | 10.78619 | 3.28716  | 17.75778 |
| F | 5.47737  | 7.34957  | 13.42884 |
| O | 7.75072  | 7.02069  | 14.71963 |
| F | 10.11075 | 8.11993  | 16.32055 |
| F | 1.46055  | 6.31245  | 15.59681 |
| F | 8.91926  | 8.84649  | 11.82379 |
| F | 11.46066 | 12.03507 | 14.11075 |
| F | 11.36297 | 10.52263 | 16.35274 |
| F | 2.84747  | 7.69054  | 13.69406 |
| F | 10.2854  | 4.85453  | 19.9302  |

|   |          |          |          |
|---|----------|----------|----------|
| F | 8.31588  | 6.7204   | 19.80226 |
| F | 10.2285  | 11.18764 | 11.84514 |
| O | 8.92242  | 4.1858   | 12.16166 |
| N | 7.47755  | 4.70165  | 13.88009 |
| N | 9.32828  | 6.08676  | 13.38364 |
| C | 9.5112   | 8.41778  | 14.06181 |
| C | 5.57999  | 5.82927  | 15.24882 |
| C | 8.82456  | 7.09692  | 14.05279 |
| C | 8.00775  | 5.27742  | 16.45429 |
| C | 4.81818  | 5.14891  | 16.18778 |
| C | 3.44866  | 5.30459  | 16.31242 |
| C | 4.85885  | 6.66968  | 14.41814 |
| C | 9.037    | 4.3545   | 16.57385 |
| C | 9.79951  | 4.19778  | 17.72047 |
| C | 7.81076  | 6.04866  | 17.59057 |
| C | 6.56151  | 3.57049  | 13.58199 |
| H | 5.92499  | 3.57298  | 14.32715 |
| C | 10.65995 | 6.1804   | 12.79975 |
| C | 9.54238  | 9.22558  | 12.94241 |
| C | 3.49041  | 6.8547   | 14.51514 |
| C | 2.79248  | 6.16403  | 15.47576 |
| C | 10.75811 | 10.10457 | 15.2376  |
| C | 8.53363  | 4.85293  | 13.08275 |
| C | 10.11452 | 8.88239  | 15.21667 |
| C | 9.55372  | 4.98139  | 18.80999 |
| C | 8.54835  | 5.92555  | 18.74936 |
| C | 10.80666 | 10.87269 | 14.1016  |
| C | 10.82646 | 6.55339  | 11.49025 |
| H | 10.09207 | 6.70989  | 10.94156 |
| C | 11.72311 | 5.90851  | 13.62732 |
| H | 11.58633 | 5.63906  | 14.50685 |
| B | 7.18452  | 5.61629  | 15.07492 |
| C | 5.72303  | 3.84234  | 12.38359 |

|   |          |          |          |
|---|----------|----------|----------|
| H | 6.29359  | 3.88896  | 11.60053 |
| H | 5.28988  | 4.704    | 12.48769 |
| C | 10.19447 | 10.44601 | 12.94445 |
| C | 7.14785  | 2.20025  | 13.60524 |
| H | 7.58103  | 2.04986  | 14.46001 |
| H | 7.82106  | 2.12629  | 12.91083 |
| C | 6.08846  | 1.14928  | 13.38925 |
| H | 6.51786  | 0.2847   | 13.29429 |
| H | 5.51831  | 1.11164  | 14.17309 |
| C | 4.67287  | 2.78543  | 12.16647 |
| H | 4.00004  | 2.85967  | 12.86122 |
| H | 4.23768  | 2.94146  | 11.31374 |
| C | 5.23725  | 1.40526  | 12.18021 |
| H | 5.77122  | 1.27211  | 11.38143 |
| H | 4.50967  | 0.76401  | 12.16203 |
| C | 13.20177 | 6.44288  | 11.81493 |
| H | 14.06428 | 6.54322  | 11.48189 |
| C | 13.01224 | 6.04717  | 13.11378 |
| H | 13.74731 | 5.87026  | 13.65534 |
| C | 12.1221  | 6.69135  | 11.00475 |
| H | 12.25832 | 6.95435  | 10.12318 |

### 6.1.8. Compound D

Charge = 0 Multiplicity = 1

|   |         |          |         |
|---|---------|----------|---------|
| F | 1.44404 | 8.45374  | 4.20154 |
| F | 7.56381 | 12.52469 | 1.87866 |
| F | 3.35802 | 14.61265 | 1.73805 |
| F | 1.58032 | 12.2969  | 1.46581 |
| O | 4.24318 | 9.37695  | 3.89776 |
| F | 2.43962 | 10.15881 | 7.07838 |
| O | 4.4801  | 12.30309 | 3.61074 |
| F | 2.49606 | 14.22616 | 4.68793 |

|   |          |          |          |
|---|----------|----------|----------|
| F | 5.79561  | 7.72578  | 2.0103   |
| F | -0.11694 | 10.56066 | 7.71085  |
| F | 7.57443  | 8.47776  | 4.0538   |
| F | -0.08985 | 14.60651 | 5.28554  |
| F | 6.18413  | 5.75628  | 0.24569  |
| F | 3.627    | 7.34619  | 6.36124  |
| F | -0.9566  | 12.84693 | 2.11654  |
| F | 7.2143   | 13.23965 | 4.46881  |
| N | 4.49977  | 11.27052 | 1.62766  |
| F | -1.0955  | 9.04082  | 4.88049  |
| F | 8.73642  | 14.82564 | 1.09894  |
| F | -2.30337 | 11.23152 | 3.84795  |
| F | 4.35825  | 5.27684  | -1.68327 |
| F | 1.70938  | 8.79873  | -0.06142 |
| N | 5.25911  | 10.32178 | 5.66071  |
| F | -1.4209  | 12.76768 | 6.81775  |
| F | 2.10718  | 6.78603  | -1.82604 |
| F | 7.2116   | 16.98586 | 0.48473  |
| F | 4.5254   | 16.88714 | 0.81674  |
| F | 8.89352  | 15.01759 | 5.61589  |
| F | 4.63103  | 4.89225  | 6.89079  |
| F | 4.43469  | 13.41915 | 8.23044  |
| F | 6.16333  | 15.11766 | 9.40906  |
| F | 8.58217  | 6.01215  | 4.55679  |
| C | 4.78802  | 12.29121 | 2.37053  |
| F | 7.08768  | 4.21312  | 5.99106  |
| F | 8.37305  | 15.94399 | 8.10926  |
| C | 3.71868  | 8.32019  | 1.07736  |
| C | 2.58358  | 12.18646 | 5.86489  |
| C | 5.73276  | 13.30961 | 6.27326  |
| C | 1.62235  | 10.34146 | 2.80379  |
| C | 5.00852  | 9.30146  | 4.91203  |
| C | 5.43337  | 13.52441 | 1.82604  |

|   |          |          |          |
|---|----------|----------|----------|
| C | 4.80348  | 11.27695 | 0.2075   |
| C | 4.84008  | 7.51969  | 1.08234  |
| C | 1.86425  | 11.29411 | 6.61855  |
| C | 6.11266  | 10.14451 | 6.82439  |
| C | 5.59105  | 7.9539   | 5.2042   |
| C | 6.80445  | 13.59838 | 1.65339  |
| C | 0.87417  | 9.5558   | 3.67199  |
| C | 5.85898  | 10.50926 | -0.25565 |
| H | 6.4057   | 10.05031 | 0.34031  |
| C | 4.00141  | 11.9875  | -0.67563 |
| H | 3.29933  | 12.50913 | -0.35857 |
| C | 7.41108  | 14.76722 | 1.2334   |
| C | 0.94821  | 11.45416 | 2.31076  |
| C | 1.86556  | 13.28605 | 5.43162  |
| C | 0.52594  | 11.46387 | 6.95553  |
| C | 4.68437  | 14.65639 | 1.55213  |
| C | -1.03917 | 10.93882 | 3.50931  |
| C | -0.42421 | 9.83779  | 4.0289   |
| C | 6.63231  | 15.86383 | 0.93294  |
| C | 6.91182  | 13.7269  | 5.69391  |
| C | 5.50608  | 13.77186 | 7.53821  |
| C | -0.35007 | 11.77327 | 2.64111  |
| C | 2.82964  | 8.06875  | 0.0664   |
| C | 5.29829  | 11.1273  | -2.51163 |
| H | 5.46124  | 11.06991 | -3.42631 |
| C | 7.47139  | 10.33028 | 6.71649  |
| H | 7.85106  | 10.55782 | 5.89975  |
| C | 6.08944  | 10.43377 | -1.62683 |
| H | 6.78641  | 9.90738  | -1.94722 |
| C | -0.1311  | 12.58135 | 6.49737  |
| C | 5.53441  | 9.81747  | 8.03953  |
| H | 4.61629  | 9.69125  | 8.10594  |
| C | 0.53561  | 13.50861 | 5.72047  |

|   |         |          |          |
|---|---------|----------|----------|
| C | 4.84247 | 7.02376  | 5.90971  |
| C | 5.07754 | 6.49962  | 0.17762  |
| C | 5.26648 | 15.81121 | 1.0923   |
| C | 8.27305 | 10.1778  | 7.84697  |
| H | 9.19397 | 10.29735 | 7.78223  |
| C | 4.26239 | 11.90901 | -2.04018 |
| H | 3.73438 | 12.38549 | -2.63945 |
| C | 6.35087 | 9.68024  | 9.16172  |
| H | 5.97149 | 9.47339  | 9.98509  |
| C | 6.6085  | 5.42271  | 5.73043  |
| C | 4.1548  | 6.26404  | -0.80678 |
| C | 6.85044 | 7.59552  | 4.75433  |
| C | 7.79555 | 14.61008 | 6.25832  |
| C | 7.70947 | 9.84907  | 9.06045  |
| H | 8.24935 | 9.74218  | 9.81079  |
| C | 3.00392 | 7.02535  | -0.8599  |
| C | 7.35521 | 6.33473  | 5.02492  |
| C | 5.34059 | 5.76363  | 6.19192  |
| C | 6.393   | 14.67837 | 8.15574  |
| C | 7.54185 | 15.07284 | 7.51828  |
| B | 3.47813 | 9.80533  | 2.36621  |
| B | 4.49349 | 12.071   | 5.36224  |

### 6.1.9. Compound 4

Charge = 0 Multiplicity = 1

|    |          |          |          |
|----|----------|----------|----------|
| Al | 1.62228  | 0.53318  | 1.01907  |
| Al | -1.65411 | 0.1548   | -1.1871  |
| F  | 3.45843  | 2.79141  | 0.10669  |
| F  | -0.87543 | -3.27291 | 2.5078   |
| F  | -3.23308 | 0.80415  | 2.45903  |
| F  | -0.77388 | 2.4253   | 2.18225  |
| O  | 1.14826  | 0.28457  | -0.71144 |

|   |          |          |          |
|---|----------|----------|----------|
| F | 0.48006  | 2.25431  | -2.61063 |
| O | -1.21684 | -0.21361 | 0.51586  |
| F | -3.60162 | 2.20272  | -0.23021 |
| F | 2.27692  | -2.39899 | 0.65535  |
| F | 0.46446  | 4.92578  | -2.56271 |
| F | 1.30595  | -3.30401 | -2.17417 |
| F | -3.6317  | 4.90132  | -0.24013 |
| F | 4.53142  | -3.84383 | 0.91785  |
| F | 3.33671  | 0.96049  | -2.28314 |
| F | -1.07354 | 5.07059  | 2.00826  |
| F | -2.68238 | -2.68117 | -0.38645 |
| N | 0.28274  | -0.38319 | 2.11895  |
| F | 3.18118  | 5.46102  | 0.02927  |
| F | -2.92465 | -4.44147 | 3.8215   |
| F | 0.90213  | 6.61476  | 0.96755  |
| F | 6.8211   | -2.64038 | 1.77117  |
| F | 4.59361  | 1.45437  | 2.10306  |
| N | -0.1891  | -0.75298 | -2.12331 |
| F | -1.57668 | 6.26777  | -1.3844  |
| F | 6.82899  | 0.00975  | 2.35207  |
| F | -5.12955 | -2.9914  | 4.45119  |
| F | -5.28687 | -0.37143 | 3.7726   |
| F | -5.09641 | -3.84386 | -0.63753 |
| F | 5.6153   | -0.15929 | -3.15694 |
| F | -4.24301 | 1.05394  | -2.81899 |
| F | -6.64769 | -0.1148  | -3.06076 |
| F | 3.58291  | -4.40085 | -3.0746  |
| C | -0.9192  | -0.56316 | 1.67159  |
| F | 5.74444  | -2.83776 | -3.56087 |
| F | -7.08583 | -2.56609 | -1.98048 |
| C | 3.34247  | -0.40517 | 1.34418  |
| C | -1.57231 | 2.11561  | -1.42271 |
| C | -3.37423 | -0.75057 | -1.56499 |

|   |          |          |          |
|---|----------|----------|----------|
| C | 1.39044  | 2.49273  | 1.20269  |
| C | 1.00616  | -0.51192 | -1.67899 |
| C | -1.99438 | -1.19834 | 2.48186  |
| C | 0.5772   | -0.62841 | 3.50093  |
| C | 3.39809  | -1.76556 | 1.0712   |
| C | -0.55732 | 2.86094  | -2.00817 |
| C | -0.39303 | -1.3146  | -3.41952 |
| C | 2.23205  | -1.13015 | -2.24092 |
| C | -1.9373  | -2.54332 | 2.83282  |
| C | 2.35691  | 3.32816  | 0.65153  |
| C | 1.34303  | -1.73615 | 3.86096  |
| H | 1.66824  | -2.42864 | 3.0935   |
| C | 0.12658  | 0.26886  | 4.47049  |
| H | -0.44746 | 1.13777  | 4.16506  |
| C | -2.98946 | -3.15718 | 3.49833  |
| C | 0.2461   | 3.13465  | 1.65876  |
| C | -2.59747 | 2.85334  | -0.84244 |
| C | -0.53768 | 4.25034  | -2.0038  |
| C | -3.14599 | -0.47849 | 2.79083  |
| C | 1.06251  | 5.30059  | 1.04387  |
| C | 2.2242   | 4.70842  | 0.56215  |
| C | -4.12245 | -2.4157  | 3.81519  |
| C | -3.65314 | -2.00343 | -1.03561 |
| C | -4.42089 | -0.14429 | -2.24892 |
| C | 0.05695  | 4.5086   | 1.58517  |
| C | 4.5374   | 0.16214  | 1.7725   |
| C | 1.18786  | -1.06911 | 6.17612  |
| H | 1.4268   | -1.24222 | 7.22095  |
| C | -1.18717 | -2.45179 | -3.56357 |
| H | -1.59034 | -2.93469 | -2.68011 |
| C | 1.6415   | -1.95441 | 5.20162  |
| H | 2.22843  | -2.82299 | 5.48425  |
| C | -1.58475 | 4.94077  | -1.40395 |



|   |          |          |          |
|---|----------|----------|----------|
| C | 0.13649  | -0.67553 | -4.5429  |
| H | 0.69576  | 0.24674  | -4.41786 |
| C | -2.6311  | 4.24128  | -0.81474 |
| C | 3.37209  | -0.35186 | -2.46348 |
| C | 4.54015  | -2.54228 | 1.19941  |
| C | -4.20505 | -1.07201 | 3.46306  |
| C | -1.42403 | -2.96485 | -4.83352 |
| H | -2.03361 | -3.85636 | -4.9442  |
| C | 0.43062  | 0.03975  | 5.80863  |
| H | 0.07802  | 0.73531  | 6.56409  |
| C | -0.10662 | -1.19772 | -5.80887 |
| H | 0.30034  | -0.69633 | -6.68169 |
| C | 4.61986  | -2.29036 | -3.1334  |
| C | 5.71006  | -1.92834 | 1.63251  |
| C | 2.33036  | -2.50791 | -2.44665 |
| C | -4.88199 | -2.63681 | -1.15799 |
| C | -0.88259 | -2.34393 | -5.95674 |
| H | -1.07255 | -2.74829 | -6.94617 |
| C | 5.71148  | -0.56983 | 1.92517  |
| C | 3.50742  | -3.08986 | -2.89472 |
| C | 4.55399  | -0.91723 | -2.92132 |
| C | -5.67294 | -0.73021 | -2.3978  |
| C | -5.9006  | -1.98459 | -1.84436 |

### 6.1.10. Compound E

Charge = 0 Multiplicity = 1

|   |          |          |          |
|---|----------|----------|----------|
| F | 0.95004  | 2.25489  | 2.17371  |
| F | 3.55836  | 1.33294  | -1.01499 |
| F | -2.99465 | -2.74255 | 0.68235  |
| F | 0.7644   | 1.30823  | -2.46237 |
| F | -5.17474 | -3.344   | -0.79023 |
| F | -2.19606 | 1.01619  | -2.04898 |
| F | 0.55531  | 4.82399  | 1.65107  |
| F | -5.85633 | -1.77896 | -2.89597 |

|   |          |          |          |
|---|----------|----------|----------|
| F | -4.36784 | 0.39491  | -3.52962 |
| F | 1.27493  | -2.7742  | -0.43859 |
| F | 5.48847  | 0.06136  | -2.32771 |
| F | 0.37039  | 3.90641  | -2.96211 |
| O | -0.23139 | -0.55025 | -0.56471 |
| F | 5.35458  | -2.62724 | -2.71988 |
| F | 0.26122  | 5.6911   | -0.91042 |
| F | 3.22757  | -4.02932 | -1.75882 |
| N | -1.32861 | -0.30073 | 1.41105  |
| C | -1.30179 | -0.54619 | 0.10267  |
| C | 0.88007  | 1.64723  | -0.12739 |
| C | 0.81329  | 2.60014  | 0.88602  |
| C | 3.4108   | 0.01508  | -1.20027 |
| C | -2.54549 | -0.84364 | -0.6429  |
| C | 2.29429  | -0.6525  | -0.70672 |
| C | -2.90141 | -0.06482 | -1.74423 |
| C | -3.32753 | -1.95591 | -0.33349 |
| C | -4.02256 | -0.36773 | -2.50341 |
| C | 0.7197   | 2.14645  | -1.42079 |
| C | -4.44603 | -2.27839 | -1.08791 |
| C | -2.56505 | 0.01644  | 2.07145  |
| C | 0.61062  | 3.95655  | 0.64301  |
| C | -4.79037 | -1.48073 | -2.17451 |
| C | 0.51632  | 3.48814  | -1.70731 |
| C | 4.44209  | -0.62651 | -1.87647 |
| C | 2.28515  | -2.0312  | -0.91294 |
| C | 0.4596   | 4.40196  | -0.66154 |
| C | -3.10687 | -0.83815 | 3.02717  |
| H | -2.59021 | -1.7526  | 3.28795  |
| C | 4.37846  | -1.99842 | -2.07525 |
| C | 3.29178  | -2.71078 | -1.58532 |
| C | -3.19153 | 1.21509  | 1.7364   |
| H | -2.73089 | 1.87769  | 1.00895  |
| C | -4.30399 | -0.48594 | 3.63978  |
| H | -4.7337  | -1.14469 | 4.38778  |
| C | -4.39274 | 1.55201  | 2.35012  |
| H | -4.88516 | 2.48423  | 2.09221  |
| C | -4.94871 | 0.70158  | 3.30169  |
| H | -5.88289 | 0.968    | 3.78657  |

Al 1.06888 0.04085 0.08267

### 6.1.11. Compound F

Charge = 0 Multiplicity = 1

|   |          |          |          |
|---|----------|----------|----------|
| F | -2.9232  | 6.49211  | 9.10782  |
| F | -1.87491 | 10.3524  | 7.27272  |
| F | 2.05138  | 7.30538  | 13.32688 |
| F | 0.7327   | 8.99796  | 7.45296  |
| F | 4.25924  | 5.78904  | 13.5981  |
| F | 1.77703  | 6.08986  | 8.78543  |
| F | -3.01237 | 5.14959  | 6.81364  |
| F | 5.26393  | 4.45317  | 11.44788 |
| F | 4.06716  | 4.65928  | 9.03005  |
| F | -0.235   | 10.72488 | 11.70136 |
| F | -1.96669 | 12.98113 | 7.08543  |
| F | 0.61111  | 7.6371   | 5.15378  |
| O | 0.41058  | 8.4176   | 10.26051 |
| F | -1.34277 | 14.54872 | 9.22374  |
| O | -2.59879 | 6.92106  | 12.44527 |
| F | -1.25336 | 5.68893  | 4.82357  |
| F | -0.42718 | 13.3904  | 11.51684 |
| N | -0.50957 | 6.74842  | 11.5086  |
| N | -1.99896 | 8.44756  | 10.83098 |
| C | 0.52325  | 7.34867  | 10.93943 |
| C | -1.83987 | 7.39506  | 11.63867 |
| C | -1.11969 | 7.86338  | 8.37309  |
| C | -2.03509 | 6.84045  | 8.15163  |
| C | -1.47022 | 11.04828 | 8.35427  |
| C | 1.86839  | 6.71775  | 11.05073 |
| C | -3.24778 | 9.16744  | 10.9692  |
| C | -1.02178 | 10.39763 | 9.49161  |
| C | 2.41703  | 6.06641  | 9.9567   |

|   |          |          |          |
|---|----------|----------|----------|
| C | 2.5351   | 6.64788  | 12.26143 |
| C | 3.57314  | 5.31543  | 10.07629 |
| C | -0.22411 | 8.06003  | 7.32447  |
| C | 3.67726  | 5.8929   | 12.40396 |
| C | -0.39434 | 5.42719  | 12.1101  |
| C | -2.09762 | 6.12041  | 6.97664  |
| C | 4.18513  | 5.22052  | 11.30916 |
| C | -0.25537 | 7.36841  | 6.14159  |
| C | -1.56454 | 12.42471 | 8.24049  |
| C | -4.10015 | 9.28936  | 9.88464  |
| H | -3.8806  | 8.89656  | 9.07076  |
| C | -0.68056 | 11.24519 | 10.53614 |
| C | -1.20961 | 6.39175  | 5.96585  |
| C | -0.22448 | 5.29917  | 13.47856 |
| H | -0.12973 | 6.05012  | 14.01892 |
| C | -1.23815 | 13.21482 | 9.31536  |
| C | -0.78576 | 12.62026 | 10.47334 |
| C | -0.53352 | 4.3366   | 11.28436 |
| H | -0.64221 | 4.44556  | 10.36719 |
| C | -3.56084 | 9.75744  | 12.17904 |
| H | -2.98568 | 9.66972  | 12.90457 |
| C | -5.60151 | 10.59831 | 11.23004 |
| H | -6.39376 | 11.07701 | 11.31992 |
| C | -5.28728 | 10.00313 | 10.01973 |
| H | -5.8688  | 10.08029 | 9.29809  |
| C | -4.73911 | 10.48221 | 12.30579 |
| H | -4.94861 | 10.89    | 13.11494 |
| C | -0.19905 | 4.02403  | 14.02396 |
| H | -0.07754 | 3.91364  | 14.93935 |
| C | -0.50811 | 3.06549  | 11.85197 |
| H | -0.59574 | 2.31401  | 11.31113 |
| C | -0.35354 | 2.91859  | 13.21214 |
| H | -0.35322 | 2.06747  | 13.58699 |

Al -1.00311 8.7909 9.70959

### 6.1.12. Compound 5

Charge = 0 Multiplicity = 1

|    |          |          |          |
|----|----------|----------|----------|
| Ga | 1.82332  | 0.81301  | -0.65233 |
| F  | -1.74301 | 3.55948  | 0.26774  |
| F  | 4.2862   | -0.92175 | -0.68738 |
| F  | -2.82538 | 0.37521  | -3.04191 |
| O  | -0.99631 | -0.00772 | -0.88001 |
| F  | -4.13661 | 4.7288   | -0.07824 |
| F  | -5.22056 | 1.56767  | -3.39136 |
| F  | 1.87353  | 2.60819  | 1.90133  |
| F  | 0.41482  | -0.36327 | -3.33787 |
| F  | 3.80576  | 4.21707  | 2.88407  |
| F  | 1.25165  | -2.32574 | -4.95363 |
| F  | 4.57575  | 1.6668   | -1.8467  |
| F  | 3.57693  | -3.62083 | -4.45131 |
| F  | 5.09432  | -2.9228  | -2.29961 |
| F  | 6.49382  | 3.28895  | -0.86559 |
| F  | 6.11364  | 4.55954  | 1.49925  |
| F  | -5.87707 | 3.74305  | -1.91492 |
| N  | 0.24279  | 1.81742  | -1.23915 |
| C  | 3.18229  | 2.04419  | 0.01997  |
| C  | 3.02005  | 2.72831  | 1.21425  |
| C  | 2.31565  | -0.58146 | -1.93521 |
| C  | 0.41891  | 3.09637  | -1.84209 |
| C  | 5.17275  | 3.7532   | 1.02479  |
| C  | -0.92439 | 1.23461  | -1.16199 |
| C  | -2.19721 | 1.96297  | -1.41373 |
| C  | 3.99061  | 3.57339  | 1.73477  |
| C  | 0.79969  | 4.19051  | -1.06696 |
| H  | 0.8616   | 4.07477  | 0.00955  |

|    |          |          |          |
|----|----------|----------|----------|
| C  | -2.55913 | 3.08305  | -0.66817 |
| C  | 4.36599  | 2.26347  | -0.66569 |
| C  | 0.91033  | 5.54339  | -3.06403 |
| H  | 1.09536  | 6.50203  | -3.53889 |
| C  | 3.51303  | -1.25125 | -1.73938 |
| C  | -3.79831 | 3.68649  | -0.8245  |
| C  | -3.1235  | 1.44964  | -2.32158 |
| C  | 0.55862  | 4.43943  | -3.83603 |
| H  | 0.47777  | 4.53003  | -4.91496 |
| C  | 0.32637  | 3.20948  | -3.22968 |
| H  | 0.0776   | 2.32852  | -3.81423 |
| C  | 3.95729  | -2.28105 | -2.55414 |
| C  | 1.57097  | -0.97074 | -3.03816 |
| C  | 3.17873  | -2.64452 | -3.64723 |
| C  | 5.36599  | 3.09937  | -0.18687 |
| C  | -4.69534 | 3.17205  | -1.75333 |
| C  | -4.35932 | 2.05226  | -2.50701 |
| C  | 1.9841   | -1.98051 | -3.89929 |
| C  | 1.02887  | 5.41629  | -1.68195 |
| H  | 1.30703  | 6.2745   | -1.07789 |
| Ga | -1.82333 | -0.81302 | 0.65233  |
| F  | 1.74299  | -3.55947 | -0.26778 |
| F  | -4.28623 | 0.92174  | 0.68747  |
| F  | 2.82539  | -0.37521 | 3.04187  |
| O  | 0.99628  | 0.00771  | 0.88     |
| F  | 4.13661  | -4.72877 | 0.07815  |
| F  | 5.22058  | -1.56766 | 3.39128  |
| F  | -1.8736  | -2.60819 | -1.90134 |
| F  | -0.41474 | 0.36325  | 3.33781  |
| F  | -3.80587 | -4.21704 | -2.88405 |
| F  | -1.25152 | 2.3257   | 4.95362  |
| F  | -4.57576 | -1.66678 | 1.84674  |
| F  | -3.57682 | 3.6208   | 4.45139  |

|   |          |          |          |
|---|----------|----------|----------|
| F | -5.09428 | 2.92278  | 2.29974  |
| F | -6.49385 | -3.28891 | 0.86565  |
| F | -6.11373 | -4.55949 | -1.4992  |
| F | 5.87709  | -3.74301 | 1.91481  |
| N | -0.24281 | -1.81743 | 1.23913  |
| C | -3.18233 | -2.04419 | -0.01995 |
| C | -3.02012 | -2.72829 | -1.21424 |
| C | -2.31563 | 0.58144  | 1.93523  |
| C | -0.41892 | -3.09639 | 1.84208  |
| C | -5.17282 | -3.75316 | -1.02475 |
| C | 0.92437  | -1.23462 | 1.16197  |
| C | 2.19721  | -1.96298 | 1.4137   |
| C | -3.99069 | -3.57336 | -1.73475 |
| C | -0.79964 | -4.19054 | 1.06695  |
| H | -0.86151 | -4.07481 | -0.00957 |
| C | 2.55912  | -3.08304 | 0.66812  |
| C | -4.36602 | -2.26345 | 0.66572  |
| C | -0.91031 | -5.54341 | 3.06401  |
| H | -1.09533 | -6.50206 | 3.53888  |
| C | -3.51302 | 1.25123  | 1.73944  |
| C | 3.79831  | -3.68647 | 0.82443  |
| C | 3.12351  | -1.44964 | 2.32153  |
| C | -0.55864 | -4.43944 | 3.83602  |
| H | -0.47782 | -4.53003 | 4.91495  |
| C | -0.3264  | -3.20949 | 3.22967  |
| H | -0.07767 | -2.32852 | 3.81423  |
| C | -3.95725 | 2.28103  | 2.55423  |
| C | -1.57091 | 0.97071  | 3.03816  |
| C | -3.17865 | 2.6445   | 3.6473   |
| C | -5.36604 | -3.09934 | 0.18691  |
| C | 4.69536  | -3.17203 | 1.75324  |
| C | 4.35933  | -2.05225 | 2.50694  |
| C | -1.98401 | 1.98047  | 3.89931  |

|   |          |          |         |
|---|----------|----------|---------|
| C | -1.02881 | -5.41632 | 1.68193 |
| H | -1.30693 | -6.27455 | 1.07787 |

### 6.1.13. Compound G

Charge = 0 Multiplicity = 1

|   |          |          |          |
|---|----------|----------|----------|
| F | 0.95004  | 2.25489  | 2.17371  |
| F | 3.55836  | 1.33294  | -1.01499 |
| F | -2.99465 | -2.74255 | 0.68235  |
| F | 0.7644   | 1.30823  | -2.46237 |
| F | -5.17474 | -3.344   | -0.79023 |
| F | -2.19606 | 1.01619  | -2.04898 |
| F | 0.55531  | 4.82399  | 1.65107  |
| F | -5.85633 | -1.77896 | -2.89597 |
| F | -4.36784 | 0.39491  | -3.52962 |
| F | 1.27493  | -2.7742  | -0.43859 |
| F | 5.48847  | 0.06136  | -2.32771 |
| F | 0.37039  | 3.90641  | -2.96211 |
| O | -0.23139 | -0.55025 | -0.56471 |
| F | 5.35458  | -2.62724 | -2.71988 |
| F | 0.26122  | 5.6911   | -0.91042 |
| F | 3.22757  | -4.02932 | -1.75882 |
| N | -1.32861 | -0.30073 | 1.41105  |
| C | -1.30179 | -0.54619 | 0.10267  |
| C | 0.88007  | 1.64723  | -0.12739 |
| C | 0.81329  | 2.60014  | 0.88602  |
| C | 3.4108   | 0.01508  | -1.20027 |
| C | -2.54549 | -0.84364 | -0.6429  |
| C | 2.29429  | -0.6525  | -0.70672 |
| C | -2.90141 | -0.06482 | -1.74423 |
| C | -3.32753 | -1.95591 | -0.33349 |
| C | -4.02256 | -0.36773 | -2.50341 |
| C | 0.7197   | 2.14645  | -1.42079 |



|    |          |          |          |
|----|----------|----------|----------|
| C  | -4.44603 | -2.27839 | -1.08791 |
| C  | -2.56505 | 0.01644  | 2.07145  |
| C  | 0.61062  | 3.95655  | 0.64301  |
| C  | -4.79037 | -1.48073 | -2.17451 |
| C  | 0.51632  | 3.48814  | -1.70731 |
| C  | 4.44209  | -0.62651 | -1.87647 |
| C  | 2.28515  | -2.0312  | -0.91294 |
| C  | 0.4596   | 4.40196  | -0.66154 |
| C  | -3.10687 | -0.83815 | 3.02717  |
| H  | -2.59021 | -1.7526  | 3.28795  |
| C  | 4.37846  | -1.99842 | -2.07525 |
| C  | 3.29178  | -2.71078 | -1.58532 |
| C  | -3.19153 | 1.21509  | 1.7364   |
| H  | -2.73089 | 1.87769  | 1.00895  |
| C  | -4.30399 | -0.48594 | 3.63978  |
| H  | -4.7337  | -1.14469 | 4.38778  |
| C  | -4.39274 | 1.55201  | 2.35012  |
| H  | -4.88516 | 2.48423  | 2.09221  |
| C  | -4.94871 | 0.70158  | 3.30169  |
| H  | -5.88289 | 0.968    | 3.78657  |
| Ga | 1.06888  | 0.04085  | 0.08267  |

#### 6.1.14. Compound H

Charge = 0 Multiplicity = 1

|   |          |         |          |
|---|----------|---------|----------|
| F | -2.9232  | 6.49211 | 9.10782  |
| F | -1.87491 | 10.3524 | 7.27272  |
| F | 2.05138  | 7.30538 | 13.32688 |
| F | 0.7327   | 8.99796 | 7.45296  |
| F | 4.25924  | 5.78904 | 13.5981  |
| F | 1.77703  | 6.08986 | 8.78543  |
| F | -3.01237 | 5.14959 | 6.81364  |
| F | 5.26393  | 4.45317 | 11.44788 |

|   |          |          |          |
|---|----------|----------|----------|
| F | 4.06716  | 4.65928  | 9.03005  |
| F | -0.235   | 10.72488 | 11.70136 |
| F | -1.96669 | 12.98113 | 7.08543  |
| F | 0.61111  | 7.6371   | 5.15378  |
| O | 0.41058  | 8.4176   | 10.26051 |
| F | -1.34277 | 14.54872 | 9.22374  |
| O | -2.59879 | 6.92106  | 12.44527 |
| F | -1.25336 | 5.68893  | 4.82357  |
| F | -0.42718 | 13.3904  | 11.51684 |
| N | -0.50957 | 6.74842  | 11.5086  |
| N | -1.99896 | 8.44756  | 10.83098 |
| C | 0.52325  | 7.34867  | 10.93943 |
| C | -1.83987 | 7.39506  | 11.63867 |
| C | -1.11969 | 7.86338  | 8.37309  |
| C | -2.03509 | 6.84045  | 8.15163  |
| C | -1.47022 | 11.04828 | 8.35427  |
| C | 1.86839  | 6.71775  | 11.05073 |
| C | -3.24778 | 9.16744  | 10.9692  |
| C | -1.02178 | 10.39763 | 9.49161  |
| C | 2.41703  | 6.06641  | 9.9567   |
| C | 2.5351   | 6.64788  | 12.26143 |
| C | 3.57314  | 5.31543  | 10.07629 |
| C | -0.22411 | 8.06003  | 7.32447  |
| C | 3.67726  | 5.8929   | 12.40396 |
| C | -0.39434 | 5.42719  | 12.1101  |
| C | -2.09762 | 6.12041  | 6.97664  |
| C | 4.18513  | 5.22052  | 11.30916 |
| C | -0.25537 | 7.36841  | 6.14159  |
| C | -1.56454 | 12.42471 | 8.24049  |
| C | -4.10015 | 9.28936  | 9.88464  |
| H | -3.8806  | 8.89656  | 9.07076  |
| C | -0.68056 | 11.24519 | 10.53614 |
| C | -1.20961 | 6.39175  | 5.96585  |

|    |          |          |          |
|----|----------|----------|----------|
| C  | -0.22448 | 5.29917  | 13.47856 |
| H  | -0.12973 | 6.05012  | 14.01892 |
| C  | -1.23815 | 13.21482 | 9.31536  |
| C  | -0.78576 | 12.62026 | 10.47334 |
| C  | -0.53352 | 4.3366   | 11.28436 |
| H  | -0.64221 | 4.44556  | 10.36719 |
| C  | -3.56084 | 9.75744  | 12.17904 |
| H  | -2.98568 | 9.66972  | 12.90457 |
| C  | -5.60151 | 10.59831 | 11.23004 |
| H  | -6.39376 | 11.07701 | 11.31992 |
| C  | -5.28728 | 10.00313 | 10.01973 |
| H  | -5.8688  | 10.08029 | 9.29809  |
| C  | -4.73911 | 10.48221 | 12.30579 |
| H  | -4.94861 | 10.89    | 13.11494 |
| C  | -0.19905 | 4.02403  | 14.02396 |
| H  | -0.07754 | 3.91364  | 14.93935 |
| C  | -0.50811 | 3.06549  | 11.85197 |
| H  | -0.59574 | 2.31401  | 11.31113 |
| C  | -0.35354 | 2.91859  | 13.21214 |
| H  | -0.35322 | 2.06747  | 13.58699 |
| Ga | -1.00311 | 8.7909   | 9.70959  |

## 7. References

1. C. H. Lee, S. J. Lee, J. W. Park, K. H. Kim, B. Y. Lee, J. S. Oh, *J. Mol. Catal. A: Chem* **1998**, *132*, 231.
2. K. Ludovici, W. Tyrra, D. Naumann, *J. Organomet. Chem.* **1992**, *441*, 363.
3. J. Cosier, A. M. Glazer, *J. Appl. Cryst.* **1986**, *19*, 105.
4. CrysAlisPro, Agilent Technologies, Version 1.171.35.8.
5. G. M. Sheldrick, **2013**, SHELXS-2013.
6. B. Hübschle, G. M. Sheldrick, B. Dittrich, *J. Appl. Crystallogr.* **2011**, *44*, 1281.
7. P. Hohenberg, W. Kohn, *Phys. Rev. B* **1964**, *136*, B864.
8. W. Kohn, L. Sham, *J. Phys. Rev.* **1965**, *140*, A1133.
9. C. Peng, H. B. Schlegel, *Israel J. of Chem.* **1993**, *33*, 449.
10. C. Peng, P. Y. Ayala, H. B. Schlegel, M. J. J. Frisch, *Comp. Chem.* **1996**, *17*, 49.
